# Supplementary material
Source: PubMed Central journal article supplement (PMC2774247)
Supplement: NIHMS99661-supplement-Fig_S1-S10__Table_S2_S4_S5.pdf [file NIHMS99661-supplement-Fig_S1-S10__Table_S2_S4_S5.pdf]

## Odor Coding by a Mammalian Receptor Repertoire

Harumi Saito, Qiuyi Chi, Hanyi Zhuang, Hiro Matsunami, Joel D. Mainland

### Supplementary Data

Supplementary Figure 1: Dose response curves of all 340 odorant/receptor interactions showing significant receptor activation. For receptors with more than 7 agonists, all of the receptor's agonists not featured in the legend are shown as grey curves. The y-axis denotes the normalized response and the x-axis denotes odorant concentration. Error bars represent standard error.

Supplementary Figure 2: Odorant clustering based on receptor response. To generate this clustering we used the 'linkage' function from Matlab using the 'average' algorithm and standardized Euclidean distance.

Supplementary Figure 3: Receptor clustering based on response to odorants. To generate this clustering we used the 'linkage' function from Matlab using the 'average' algorithm and standardized Euclidean distance.

Supplementary Figure 4: Outline of the screening procedure. Values represent the number of receptors. Percentages represent the surviving percentage out of the initial set of cloned receptors.

Supplementary Figure 5: A phylogenetic tree of all 464 receptors in the screening library as well as 1425 intact mouse and human ORs (Supplementary Table 1). Receptors used in the mixture-screening phase are labeled with open magenta symbols; receptors found to have at least one agonist in this study are labeled with closed green symbols. Mouse receptors are labeled with circles; human receptors are labeled with triangles. Unlabeled lines represent untested receptors. This is a different representation of the same data presented in Fig. 2B.

Supplementary Figure 6: Sensitivity-ordered tuning curves. The 63 odorants are displayed along the x-axis of each subplot according to the strengths of the responses they elicit from each receptor. The odorants that elicit the strongest responses are placed near the center of the distribution; those that elicit the weakest responses are placed near the edges. The order of odorants is thus different for different receptors. The y-axis is the EC50 of the odorant-receptor interaction. The 62 tuning-curve graphs are ordered by the number of agonists for each receptor.

Supplementary Figure 7: One-dimensional tuning curves. The 63 odorants are plotted along the x-axis of each subplot according to the first principal component of the odorant in Haddad et al.'s odor space (Haddad et al., 2008, *Nature Methods*, 5(5), 425-9). The order of odorants is the same for different receptors. The y-axis is the EC50 of the odorant-receptor interaction. The 62 tuning-curve

graphs are ordered by the number of agonists for each receptor.

Supplementary Figure 8: Two-dimensional tuning plots. A two-dimensional projection of 2,683 odorants in Haddad et al.'s odor space (Haddad et al., 2008, *Nature Methods*, 5(5), 425-9) is plotted in grey. A given receptor's agonists are plotted in red in the respective subplots. A circle circumscribing all agonists is drawn in blue. The 62 tuning-curve graphs are ordered by the number of agonists for each receptor. In the upper left of each subplot is the radius of a hypersphere enclosing all of the receptor's agonists; in the upper right is the number of agonists.

Supplementary Figure 9: Snake plot of a typical OR in which amino acid residues with ligand-specificity-determining properties are highlighted. Residue properties selected by the greedy optimization algorithm are indicated by color. Residues previously predicted to be ligand-specificity determining (Man et al., 2004, *Protein Sci*, 13(1), 240-54) are outlined in dark blue. Note that only one of the previously predicted residues (in the third transmembrane domain) was selected by our algorithm. Amino acid positions conserved in at least 90% of the 1425 receptors are labeled with their single-letter amino acid code. Abbreviations for the amino acid residues are as follows: A, Ala; C, Cys; D, Asp; F, Phe; G, Gly; H, His; I, Ile; K, Lys; L, Leu; M, Met; N, Asn; P, Pro; Q, Gln; R, Arg; S, Ser; T, Thr; and Y, Tyr.

Supplementary Figure 10: EC<sub>50</sub> values for 62 odorant receptors and 63 odorants. Class I receptors are shown in green, class II receptors in purple on the y-axis. Human odorant receptors have a gray background. Receptors are ordered according to the number of agonists identified in our dataset. Odorants are colored by functional group on the x-axis: Red=Aliphatic carboxylic acids, Light green=Aliphatic alcohols, Turquoise=Aliphatic aldehydes, Light blue=Aliphatic ketones, Green = Diketones, Dark purple=Aliphatic esters, Orange=Thiols, Black=Aromatics, Rust=Cyclic ketones, Light purple=Aliphatic aromatic ketones, Yellow=Aromatic carboxylic acids, Cherry=aromatic aldehyde, Blue=Aliphatic esters.

Supplementary Table 1: Multiple alignment of all 464 receptors in the screening library as well as 1425 intact mouse and human ORs from (Niimura et al., 2005, *Gene*, 346, 23-8) in FASTA format. Receptors in the screening library follow the naming convention of (Glusman et al., 2001, *Genome Res*, 11, 685-702), but are prefixed with an 'S'.

Supplementary Table 2: Odorants used to screen the receptor libraries. During the mixture screening stage the odorants were divided by functional group into 8 mixtures as indicated. Note that prenyl acetate was used in two different mixtures.

Supplementary Table 3: The numerical EC<sub>50</sub> values (log M) displayed in Fig. 1

Supplementary Table 4: CAS registry numbers for 2,683 odorants used to estimate the size of odorant space. Structure files were obtained from (<http://www.thegoodscentcompany.com>).

Supplementary Table 5: 16 amino acid property descriptors that explain over 53% of the variance in our dataset. Note that some descriptors have a weight higher than one.

normalized response

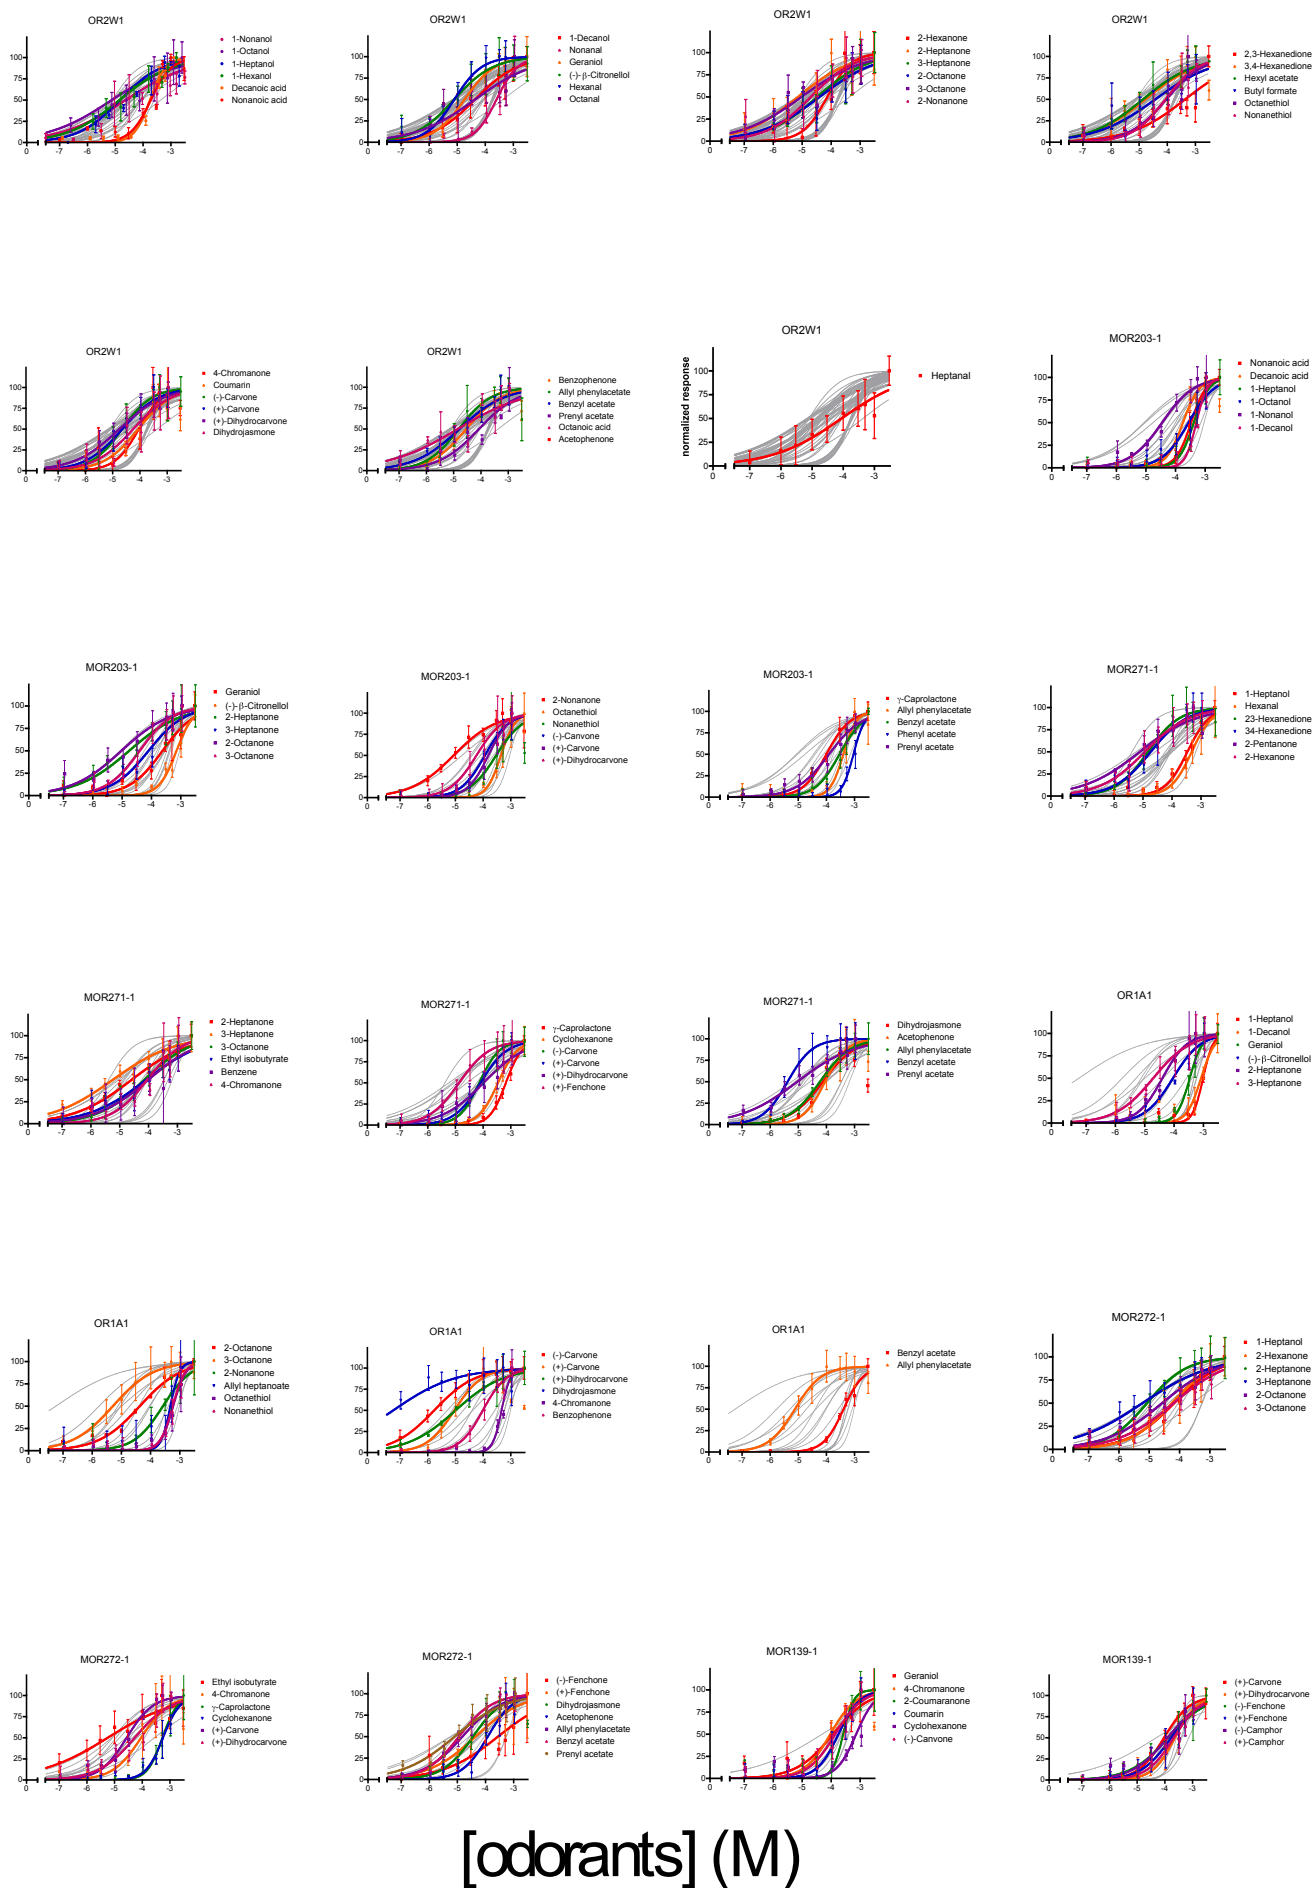

[odorants] (M)

**Figure S1.** Dose response curves of all 340 odorant/receptor interactions showing significant receptor activation. For receptors with more than 7 agonists, all of the receptor's agonists not featured in the legend are shown as grey curves. The y-axis denotes the normalized response and the x-axis denotes odorant concentration. Error bars represent standard error.

normalized response

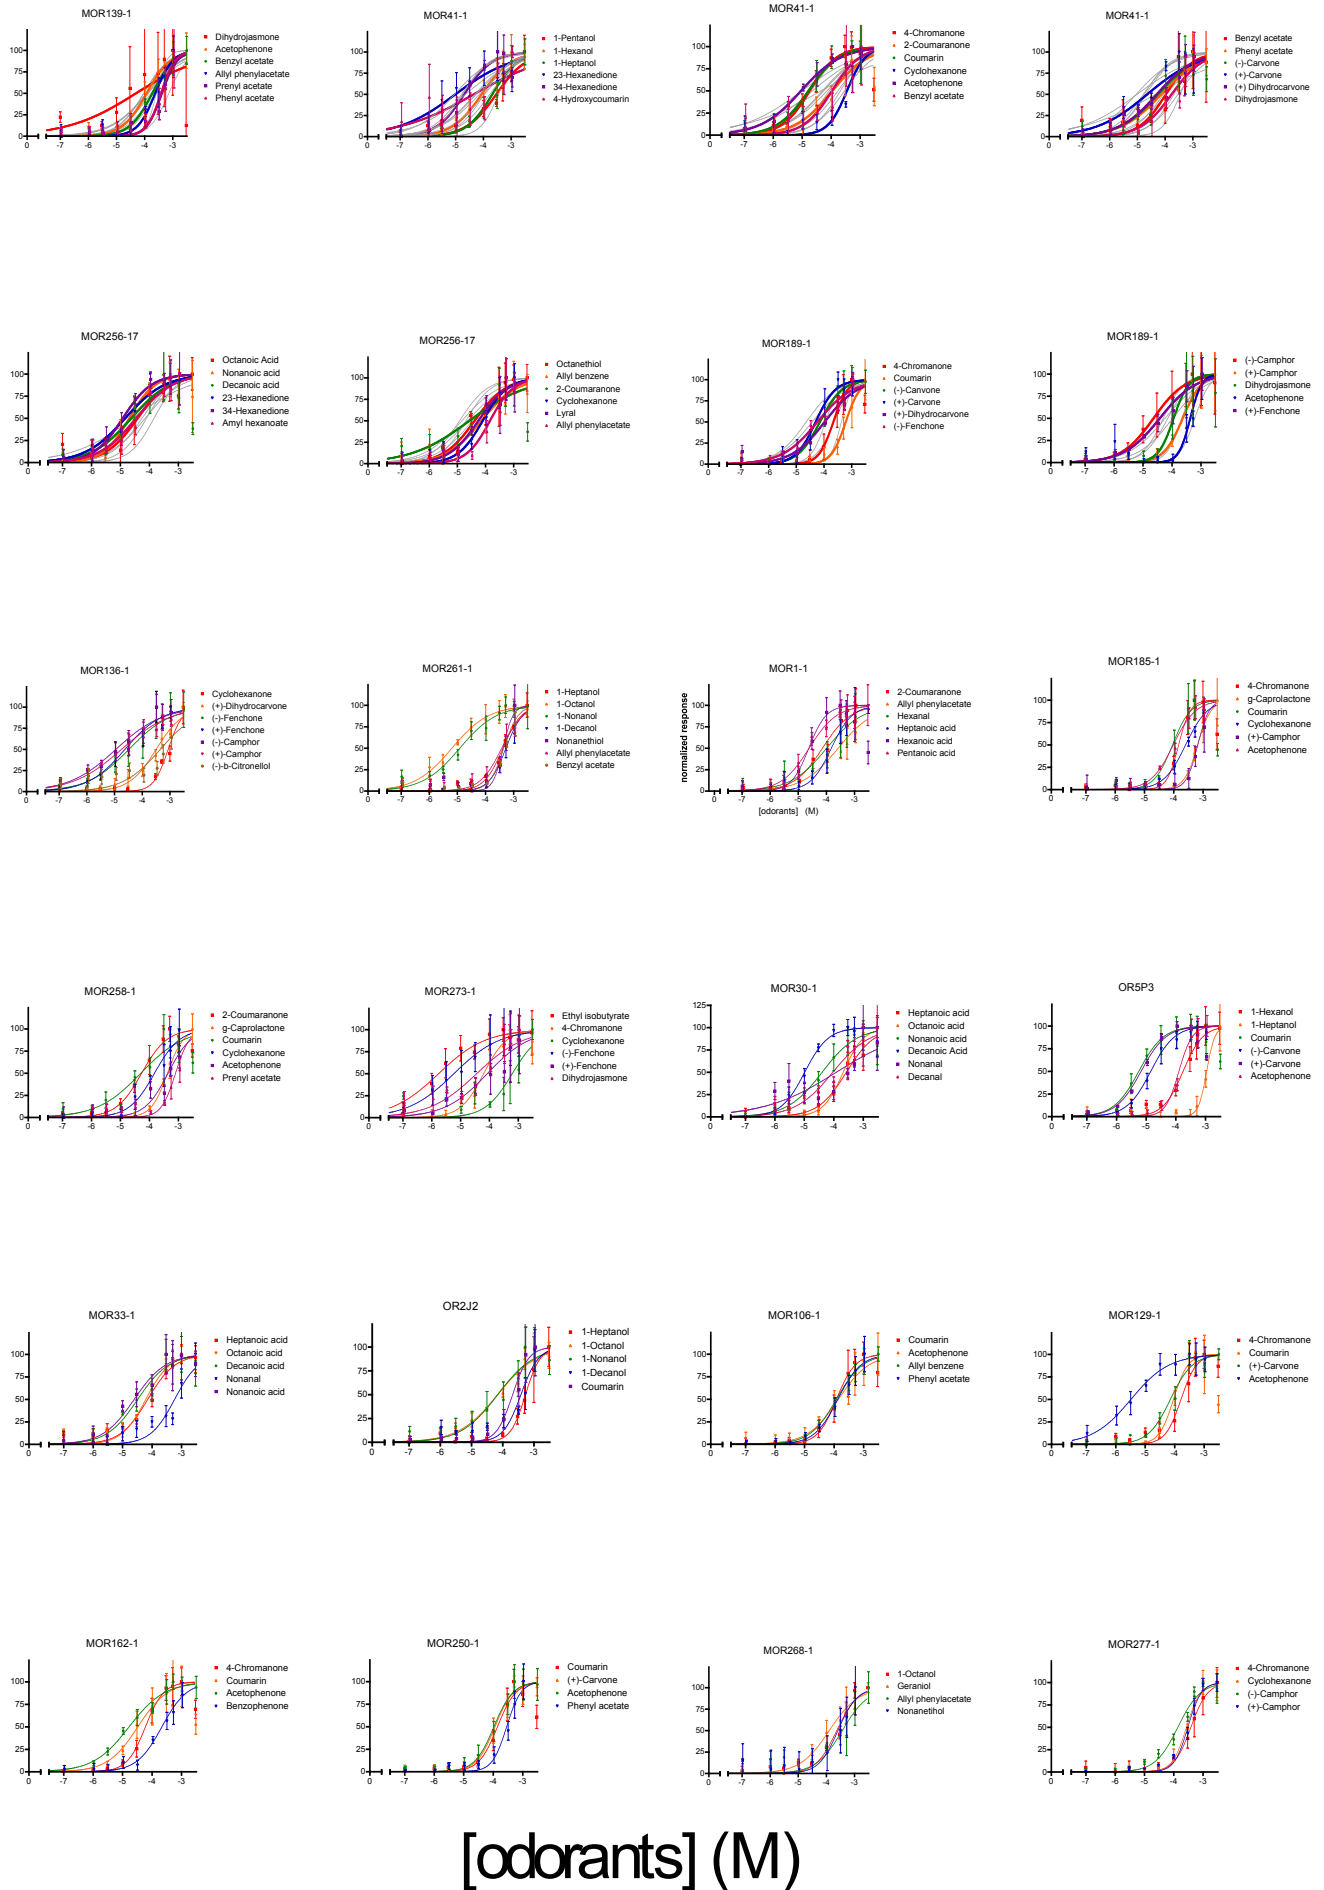

[odorants] (M)

**Figure S1 (continued).** Dose response curves of all 340 odorant/receptor interactions showing significant receptor activation. For receptors with more than 7 agonists, all of the receptor's agonists not featured in the legend are shown as grey curves. The y-axis denotes the normalized response and the x-axis denotes odorant concentration. Error bars represent standard error.

normalized response

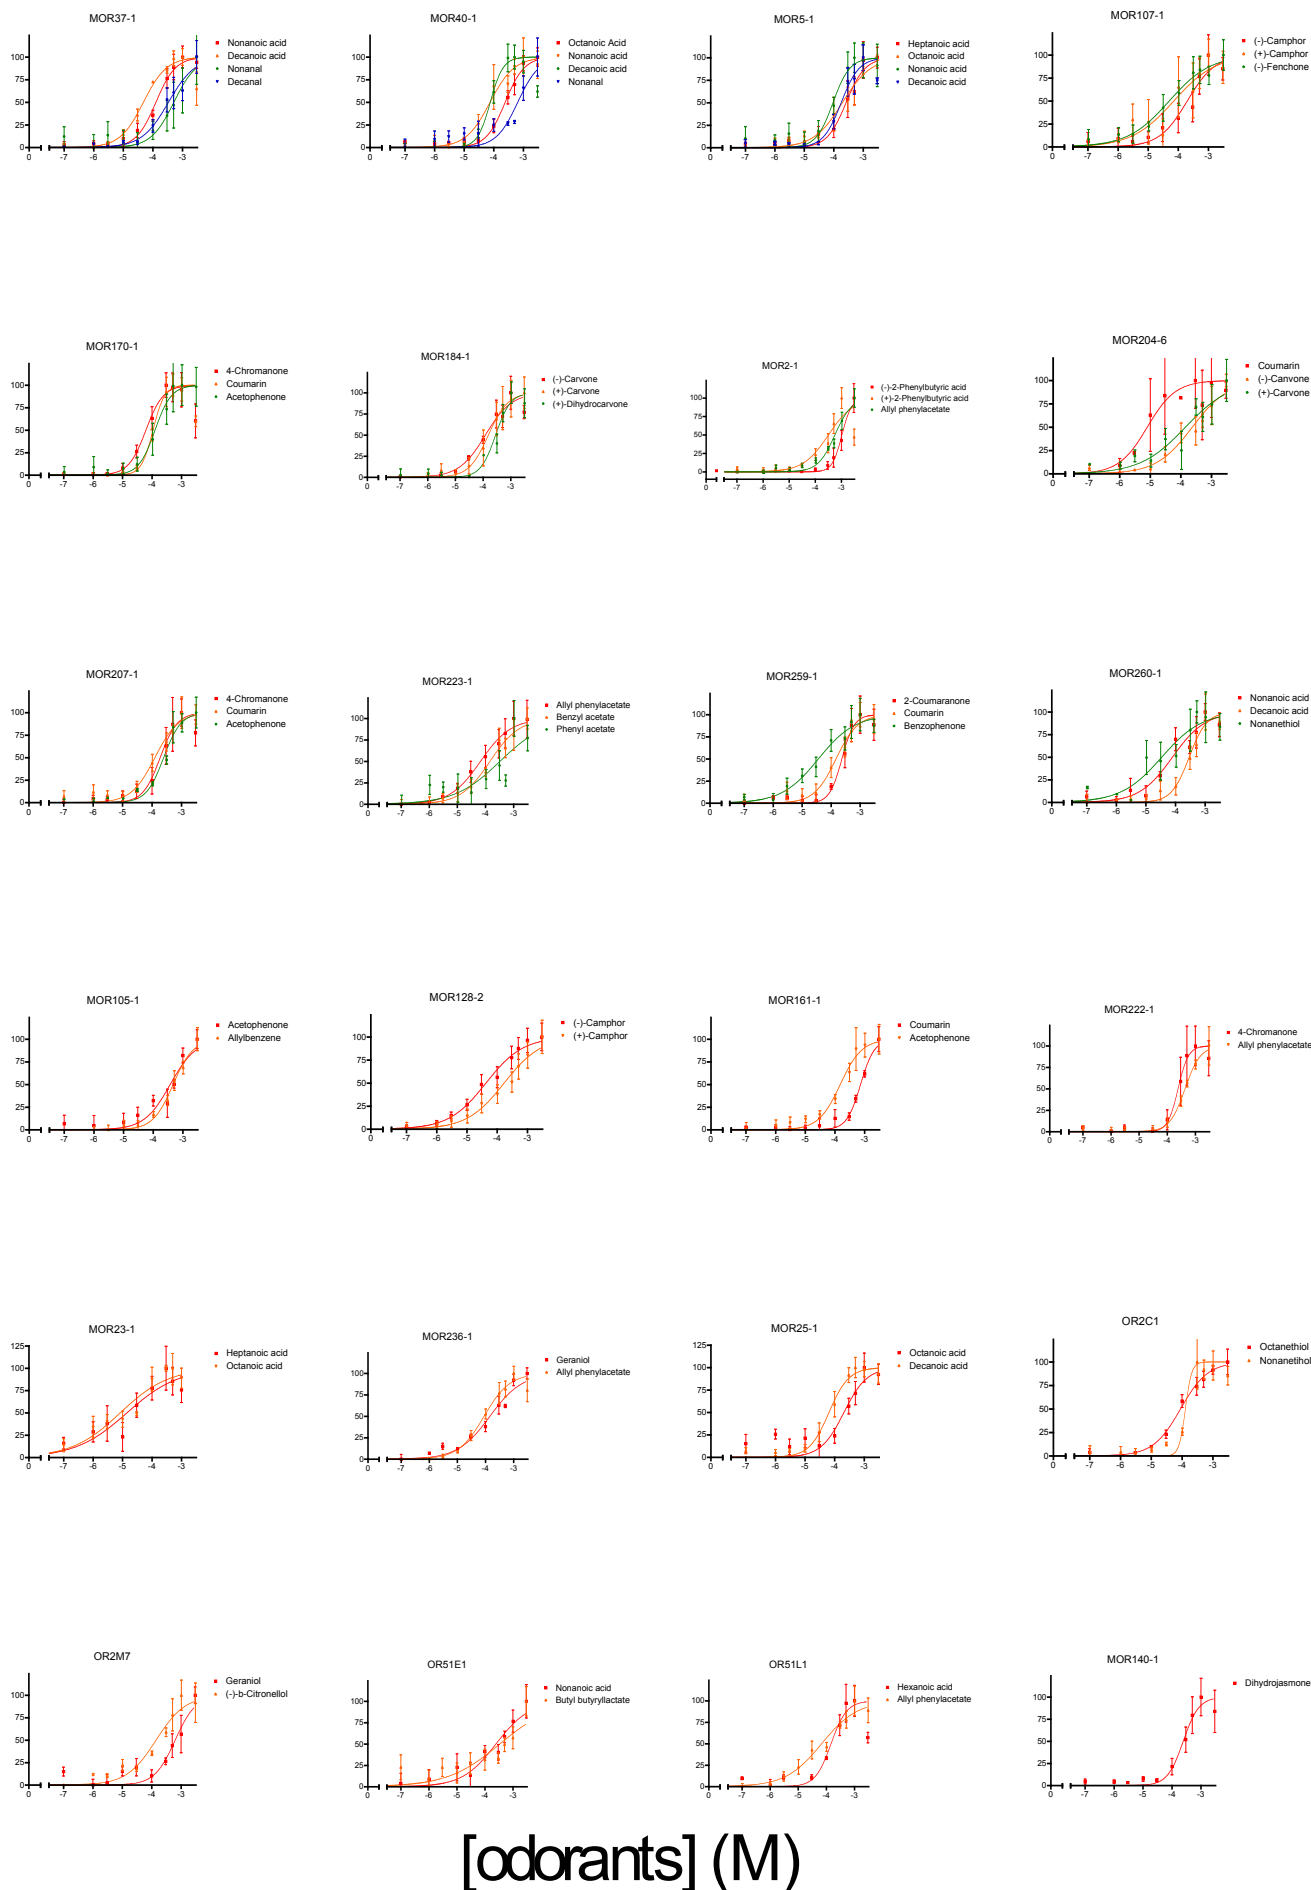

[odorants] (M)

**Figure S1 (continued).** Dose response curves of all 340 odorant/receptor interactions showing significant receptor activation. For receptors with more than 7 agonists, all of the receptor's agonists not featured in the legend are shown as grey curves. The y-axis denotes the normalized response and the x-axis denotes odorant concentration. Error bars represent standard error.

normalized response

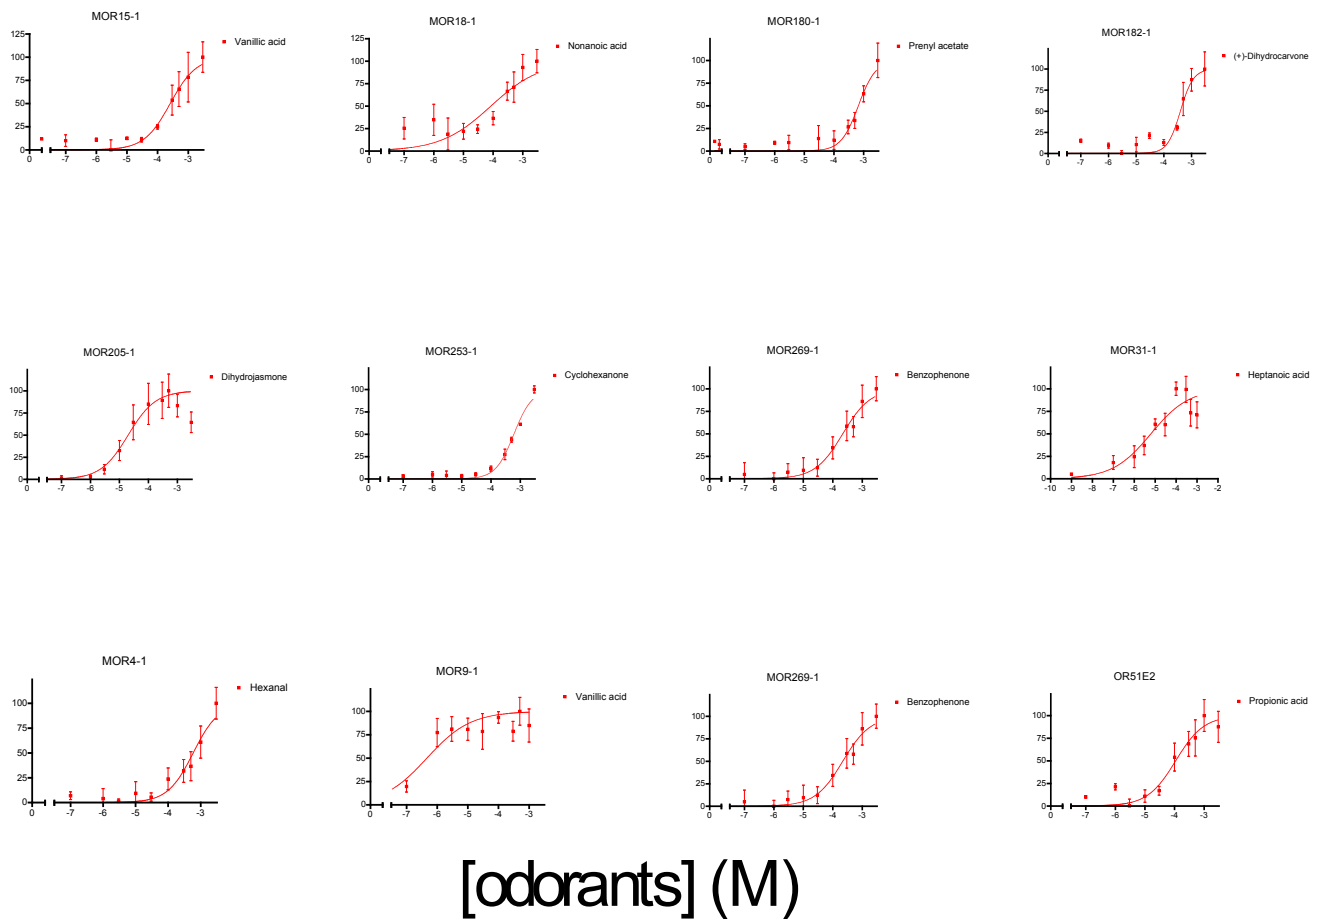

**Figure S1 (continued).** Dose response curves of all 340 odorant/receptor interactions showing significant receptor activation. For receptors with more than 7 agonists, all of the receptor's agonists not featured in the legend are shown as grey curves. The y-axis denotes the normalized response and the x-axis denotes odorant concentration. Error bars represent standard error.

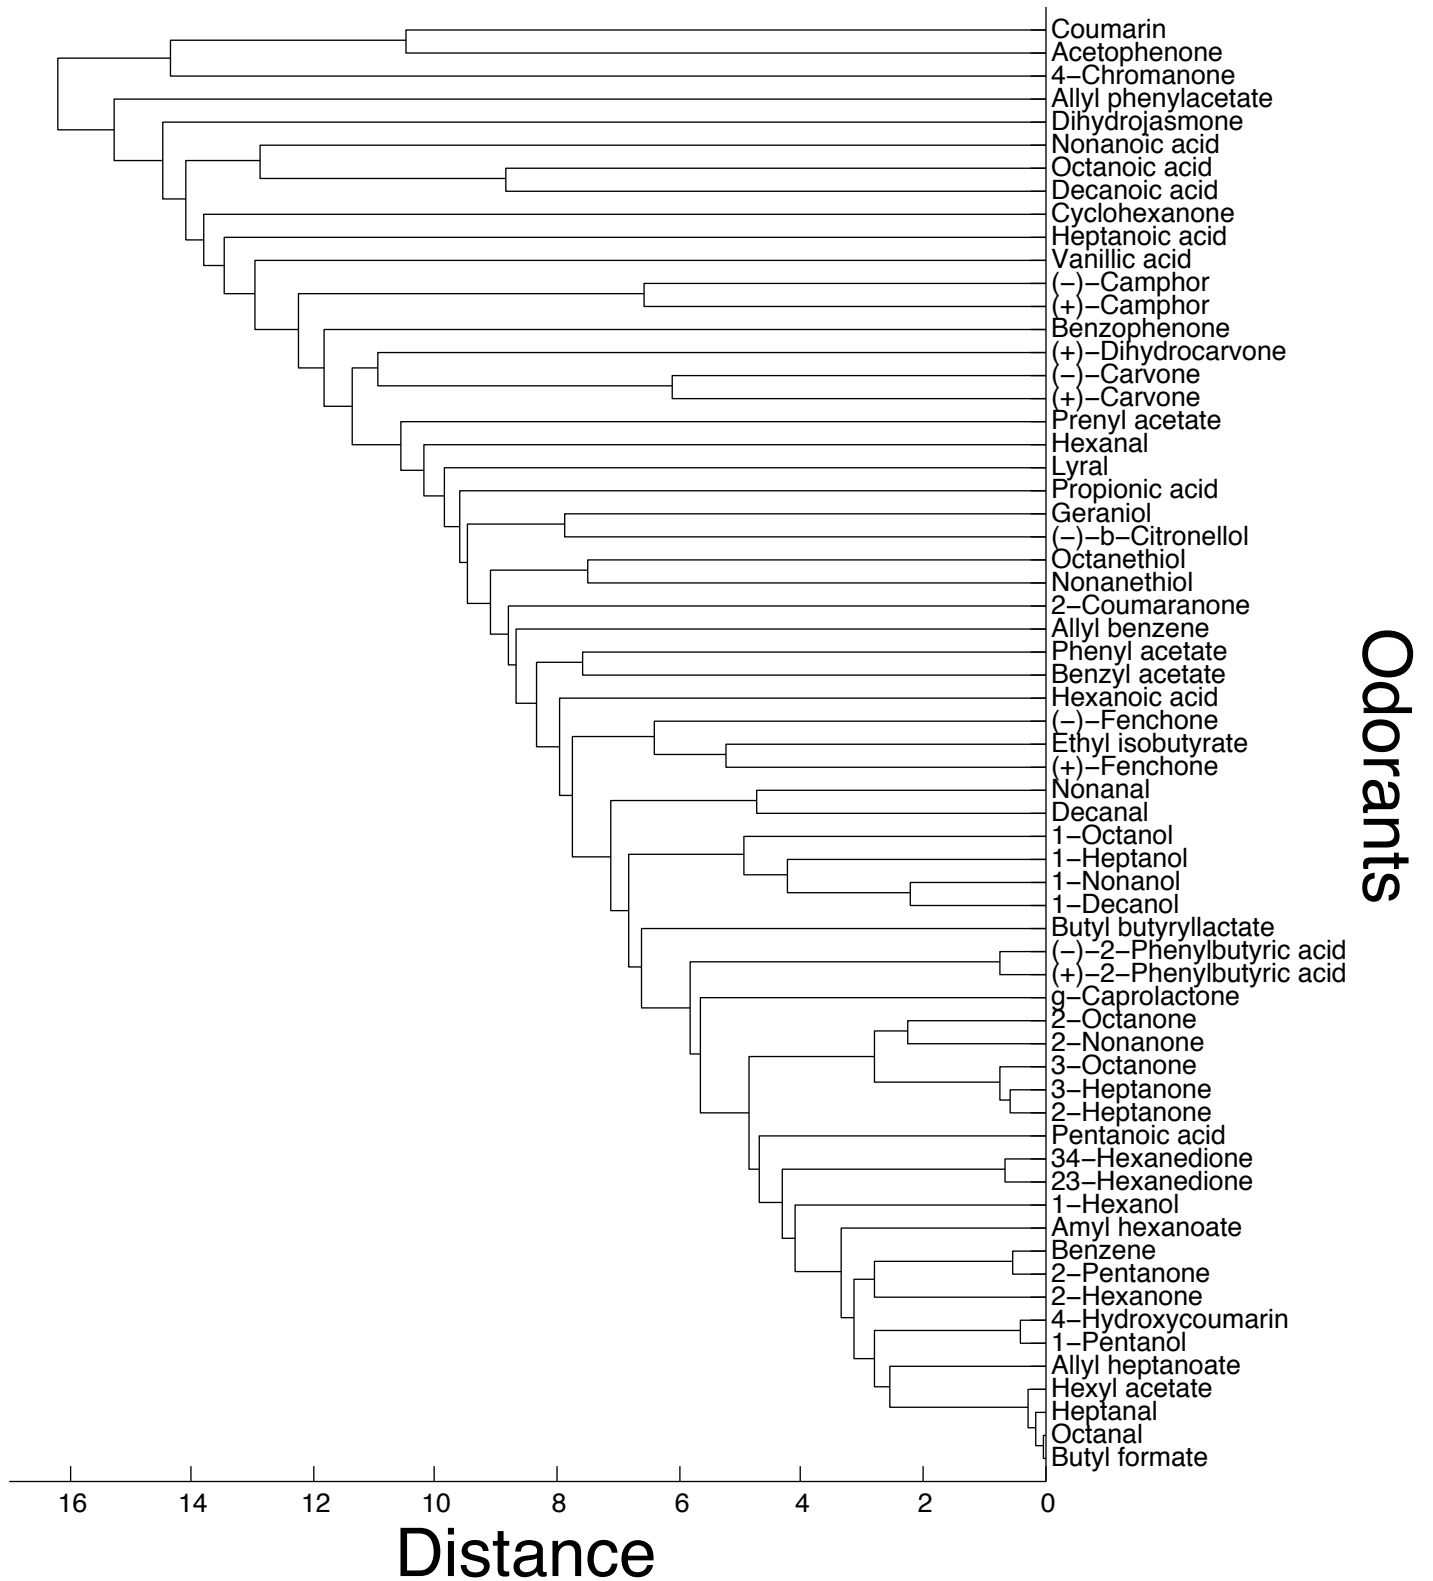

**Figure S2.** Odorant clustering based on receptor response. To generate this clustering we used the 'linkage' function from Matlab using the 'average' algorithm and standardized Euclidean distance.



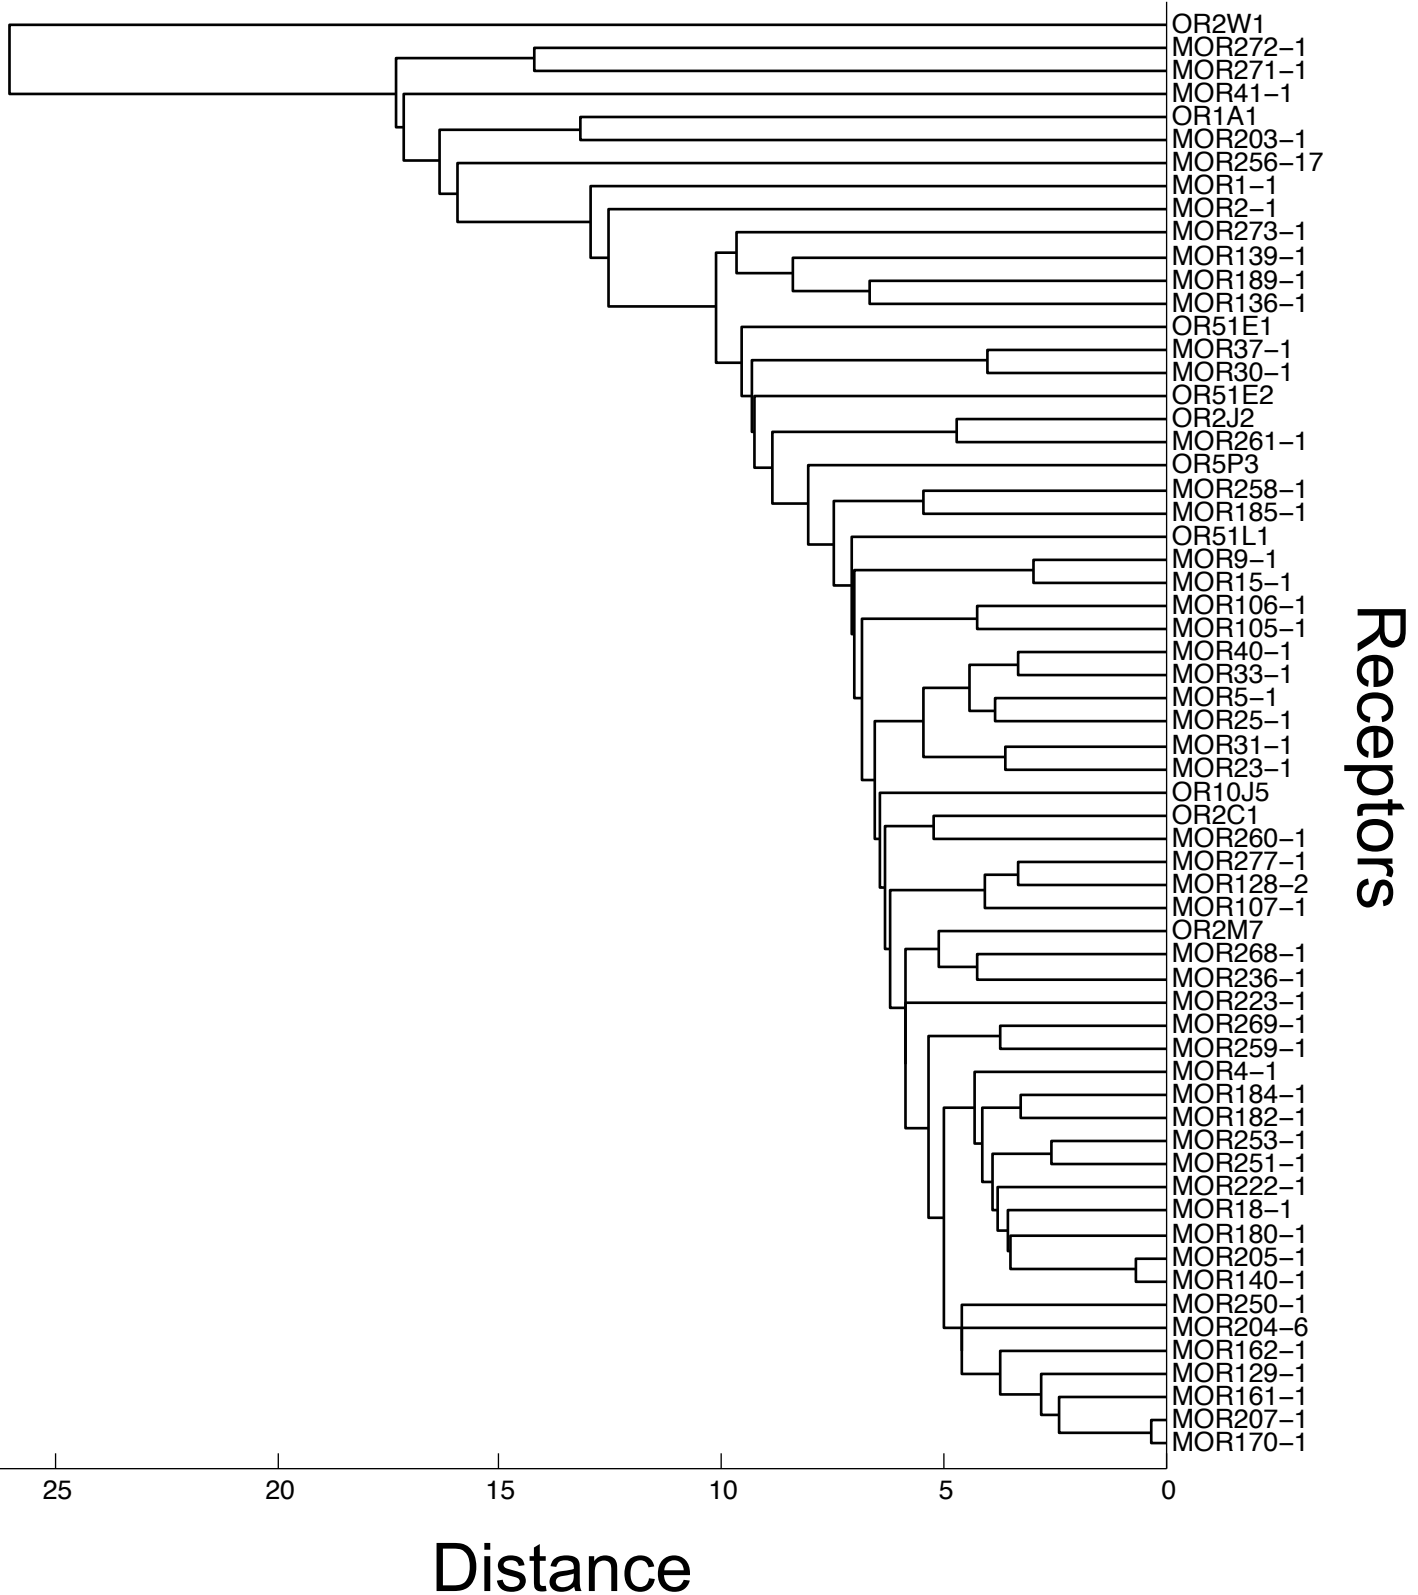

**Figure S3.** Receptor clustering based on response to odorants. To generate this clustering we used the 'linkage' function from Matlab using the 'average' algorithm and standardized Euclidean distance.

# Screening procedure

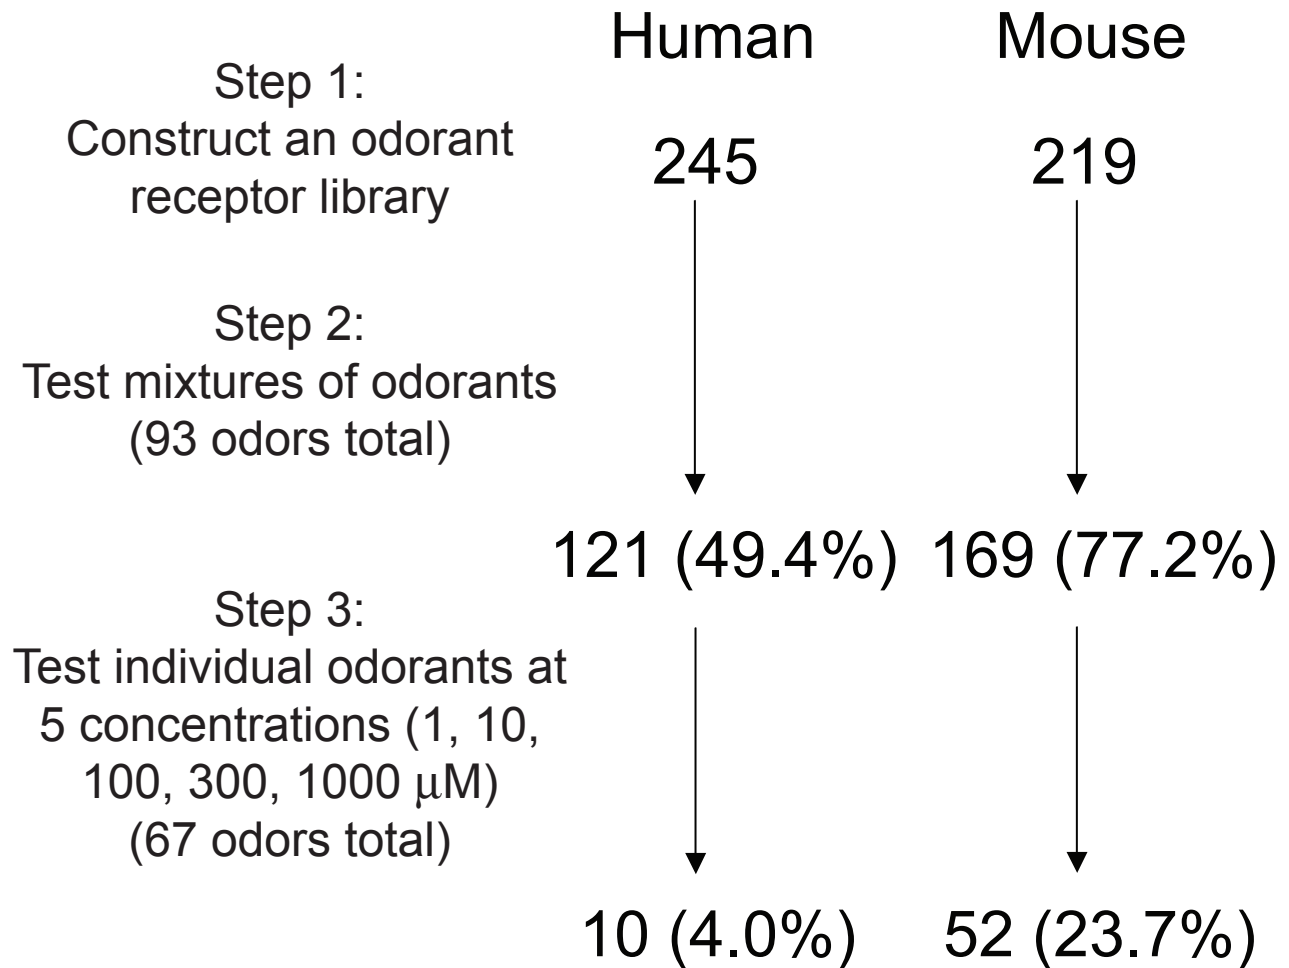

**Figure S4.** Outline of the screening procedure. Values represent the number of receptors. Percentages represent the surviving percentage out of the initial set of cloned receptors.

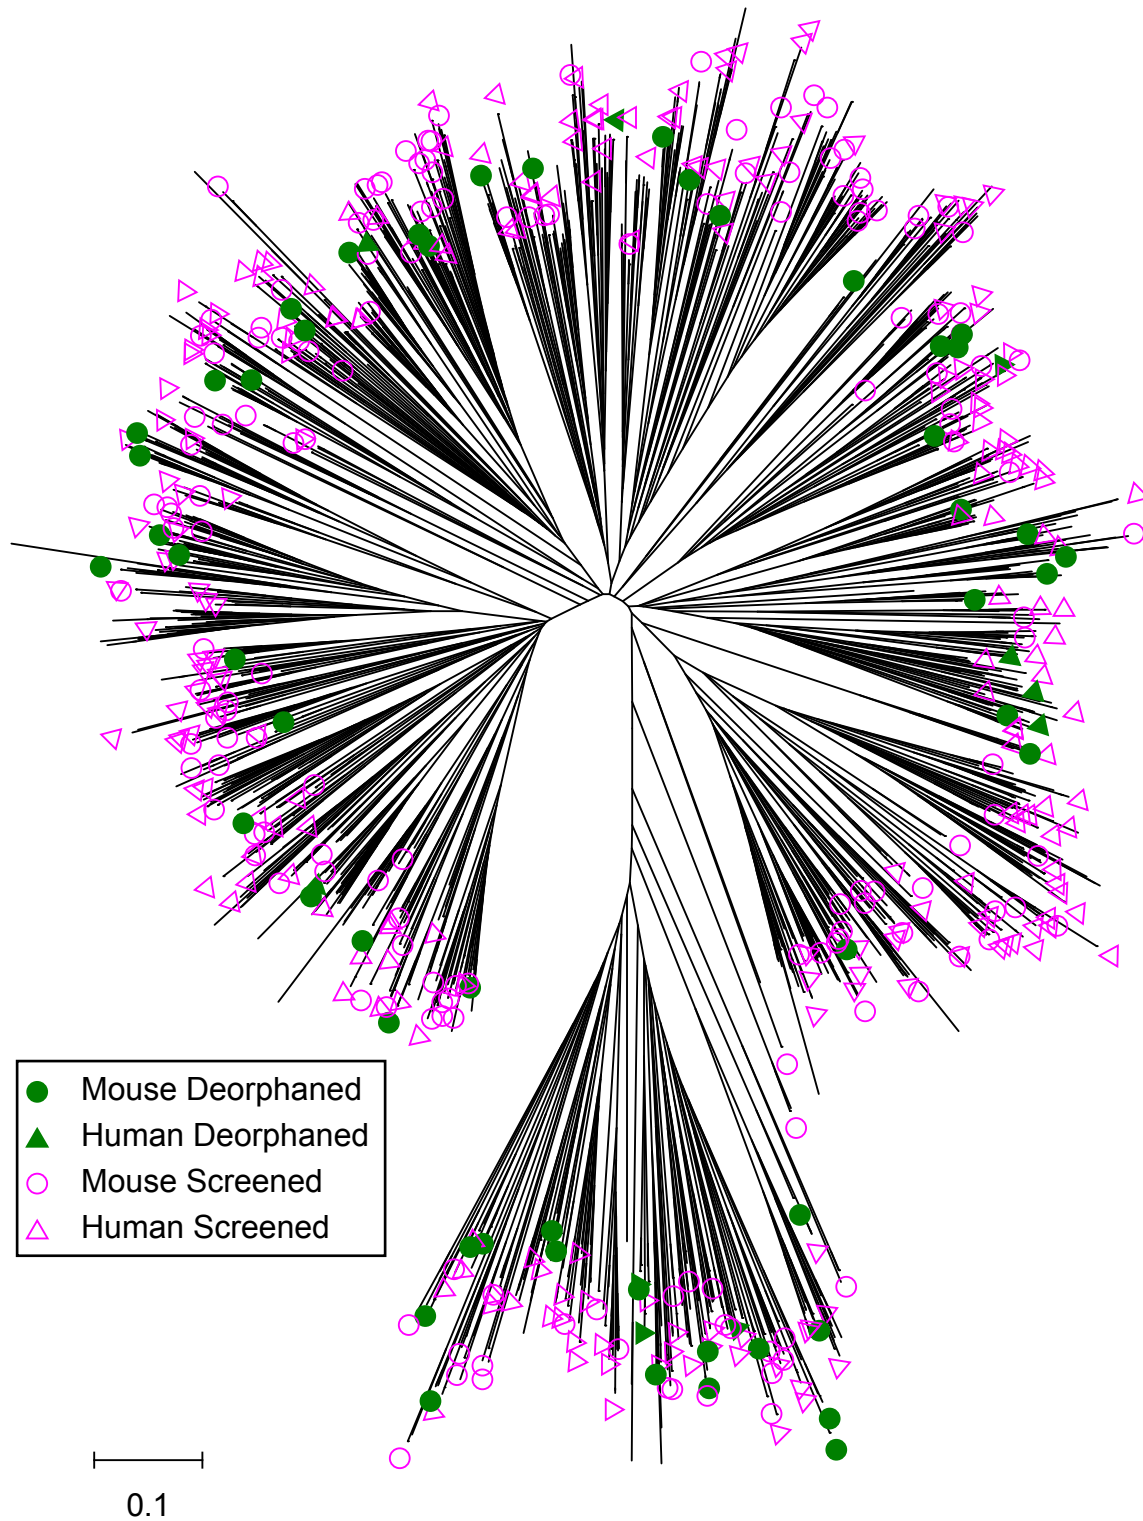

**Figure S5.** A phylogenetic tree of all 464 receptors in the screening library as well as 1425 intact mouse and human ORs (Supplementary Table 1). Receptors used in the mixture-screening phase are labeled with open magenta symbols; receptors found to have at least one agonist in this study are labeled with closed green symbols. Mouse receptors are labeled with circles; human receptors are labeled with triangles. Unlabeled lines represent untested receptors. This is a different representation of the same data presented in Fig. 2B.

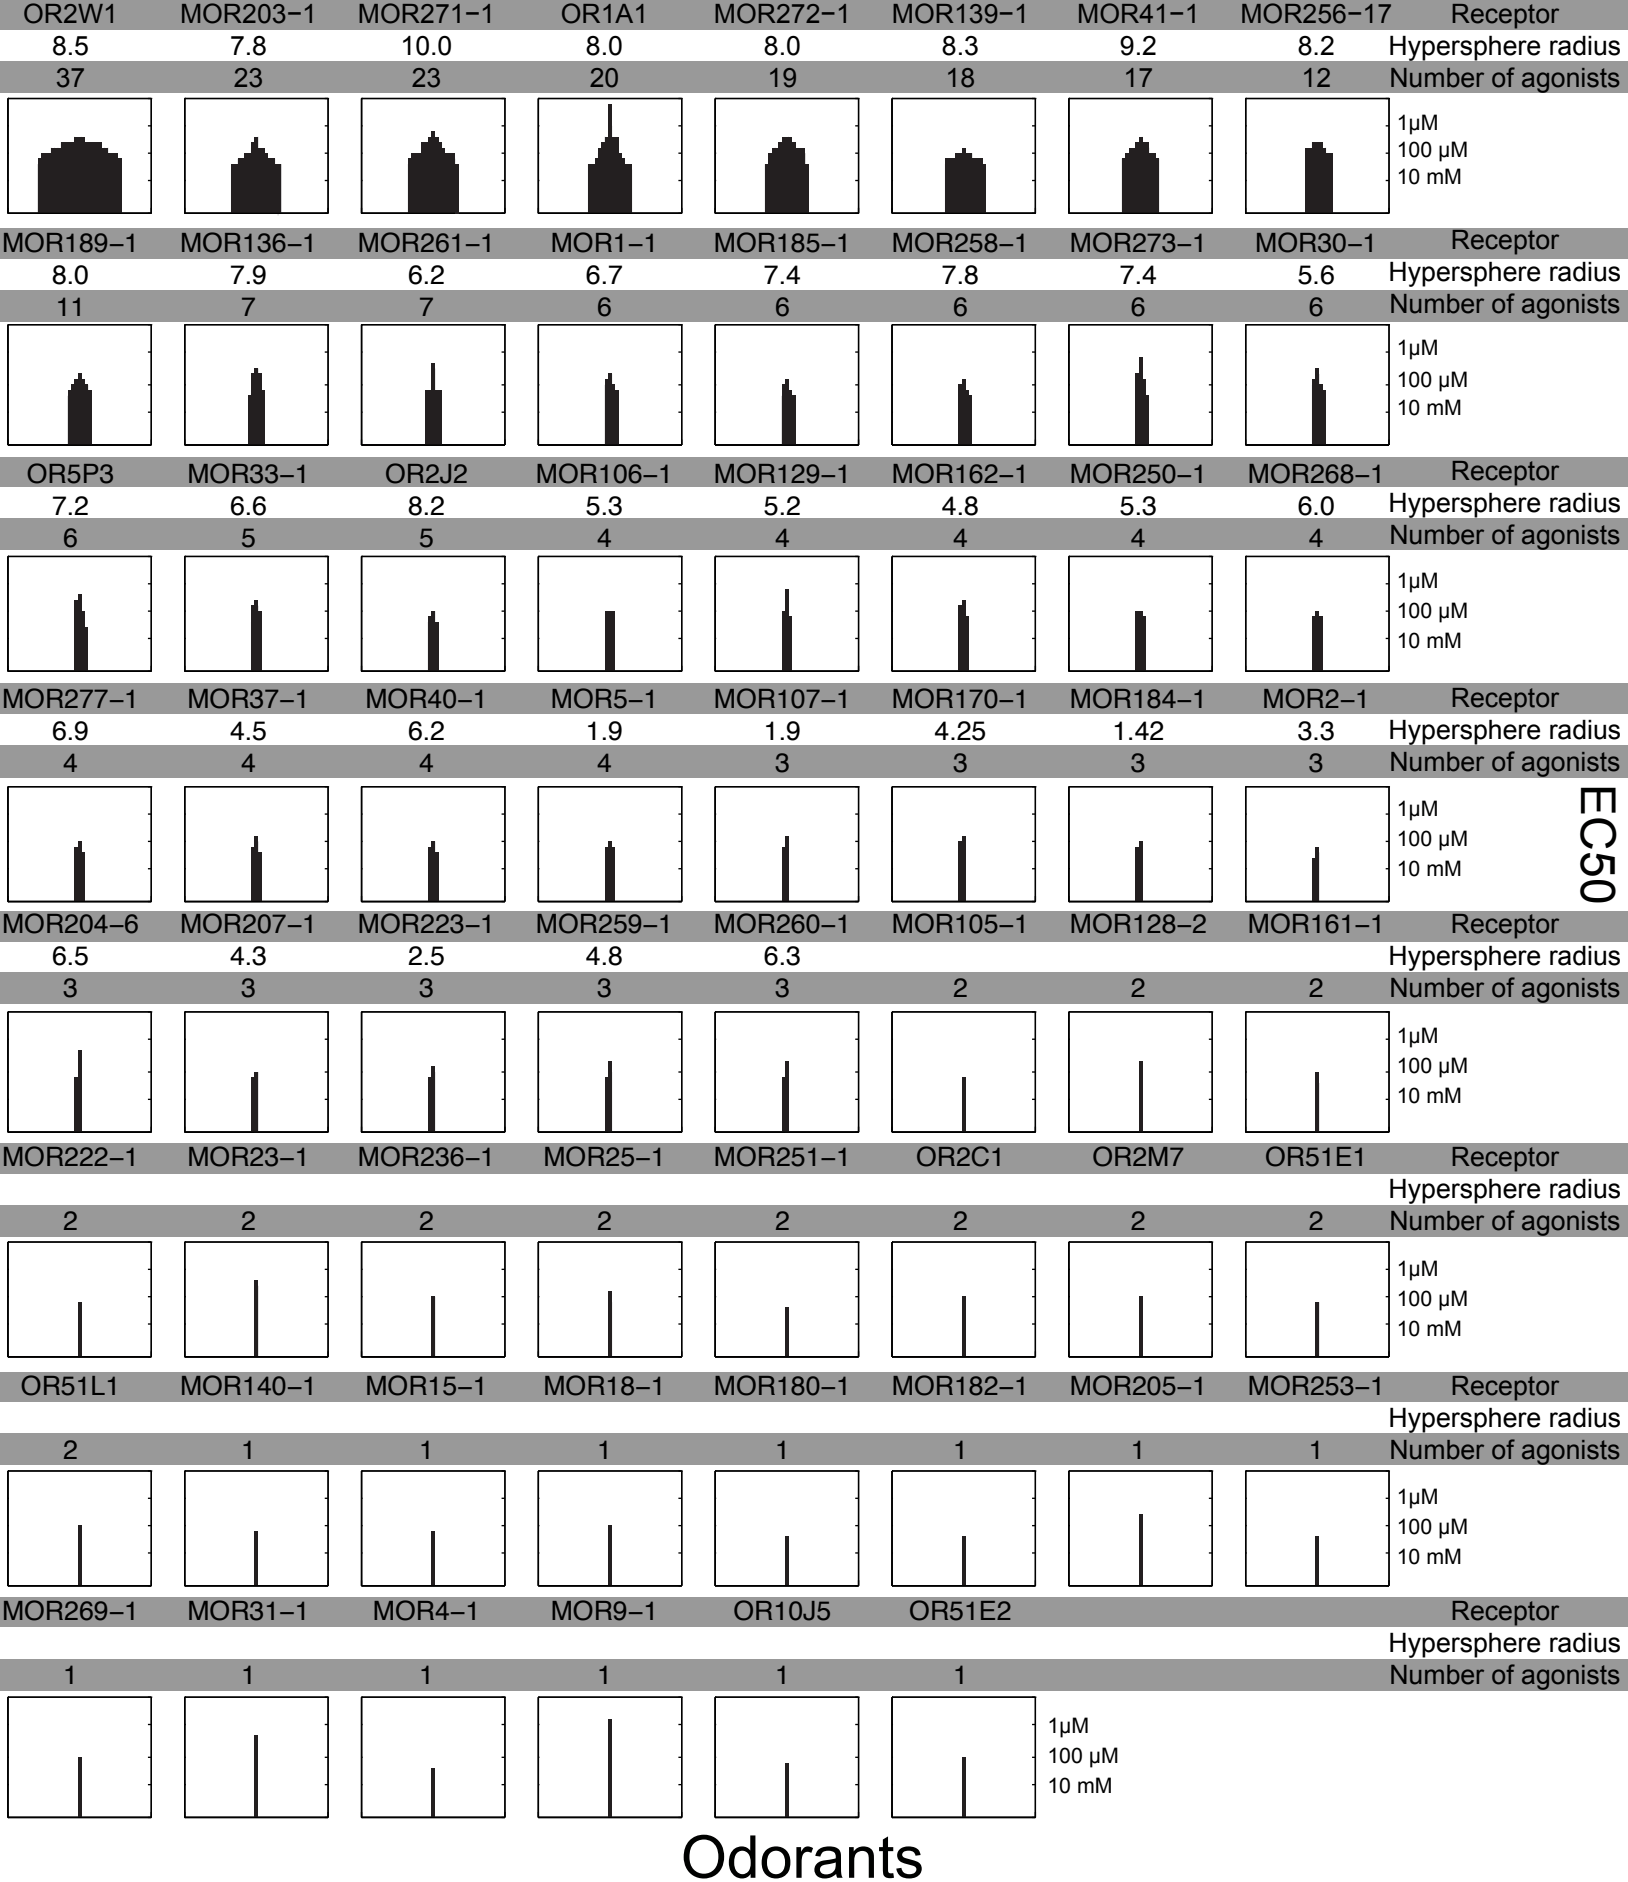

## Odorants

**Figure S6.** Sensitivity-ordered tuning curves. The 63 odorants are displayed along the x-axis of each subplot according to the strengths of the responses they elicit from each receptor. The odorants that elicit the strongest responses are placed near the center of the distribution; those that elicit the weakest responses are placed near the edges. The order of odorants is thus different for different receptors. The y-axis is the EC<sub>50</sub> of the odorant-receptor interaction. The 62 tuning-curve graphs are ordered by the number of agonists for each receptor.

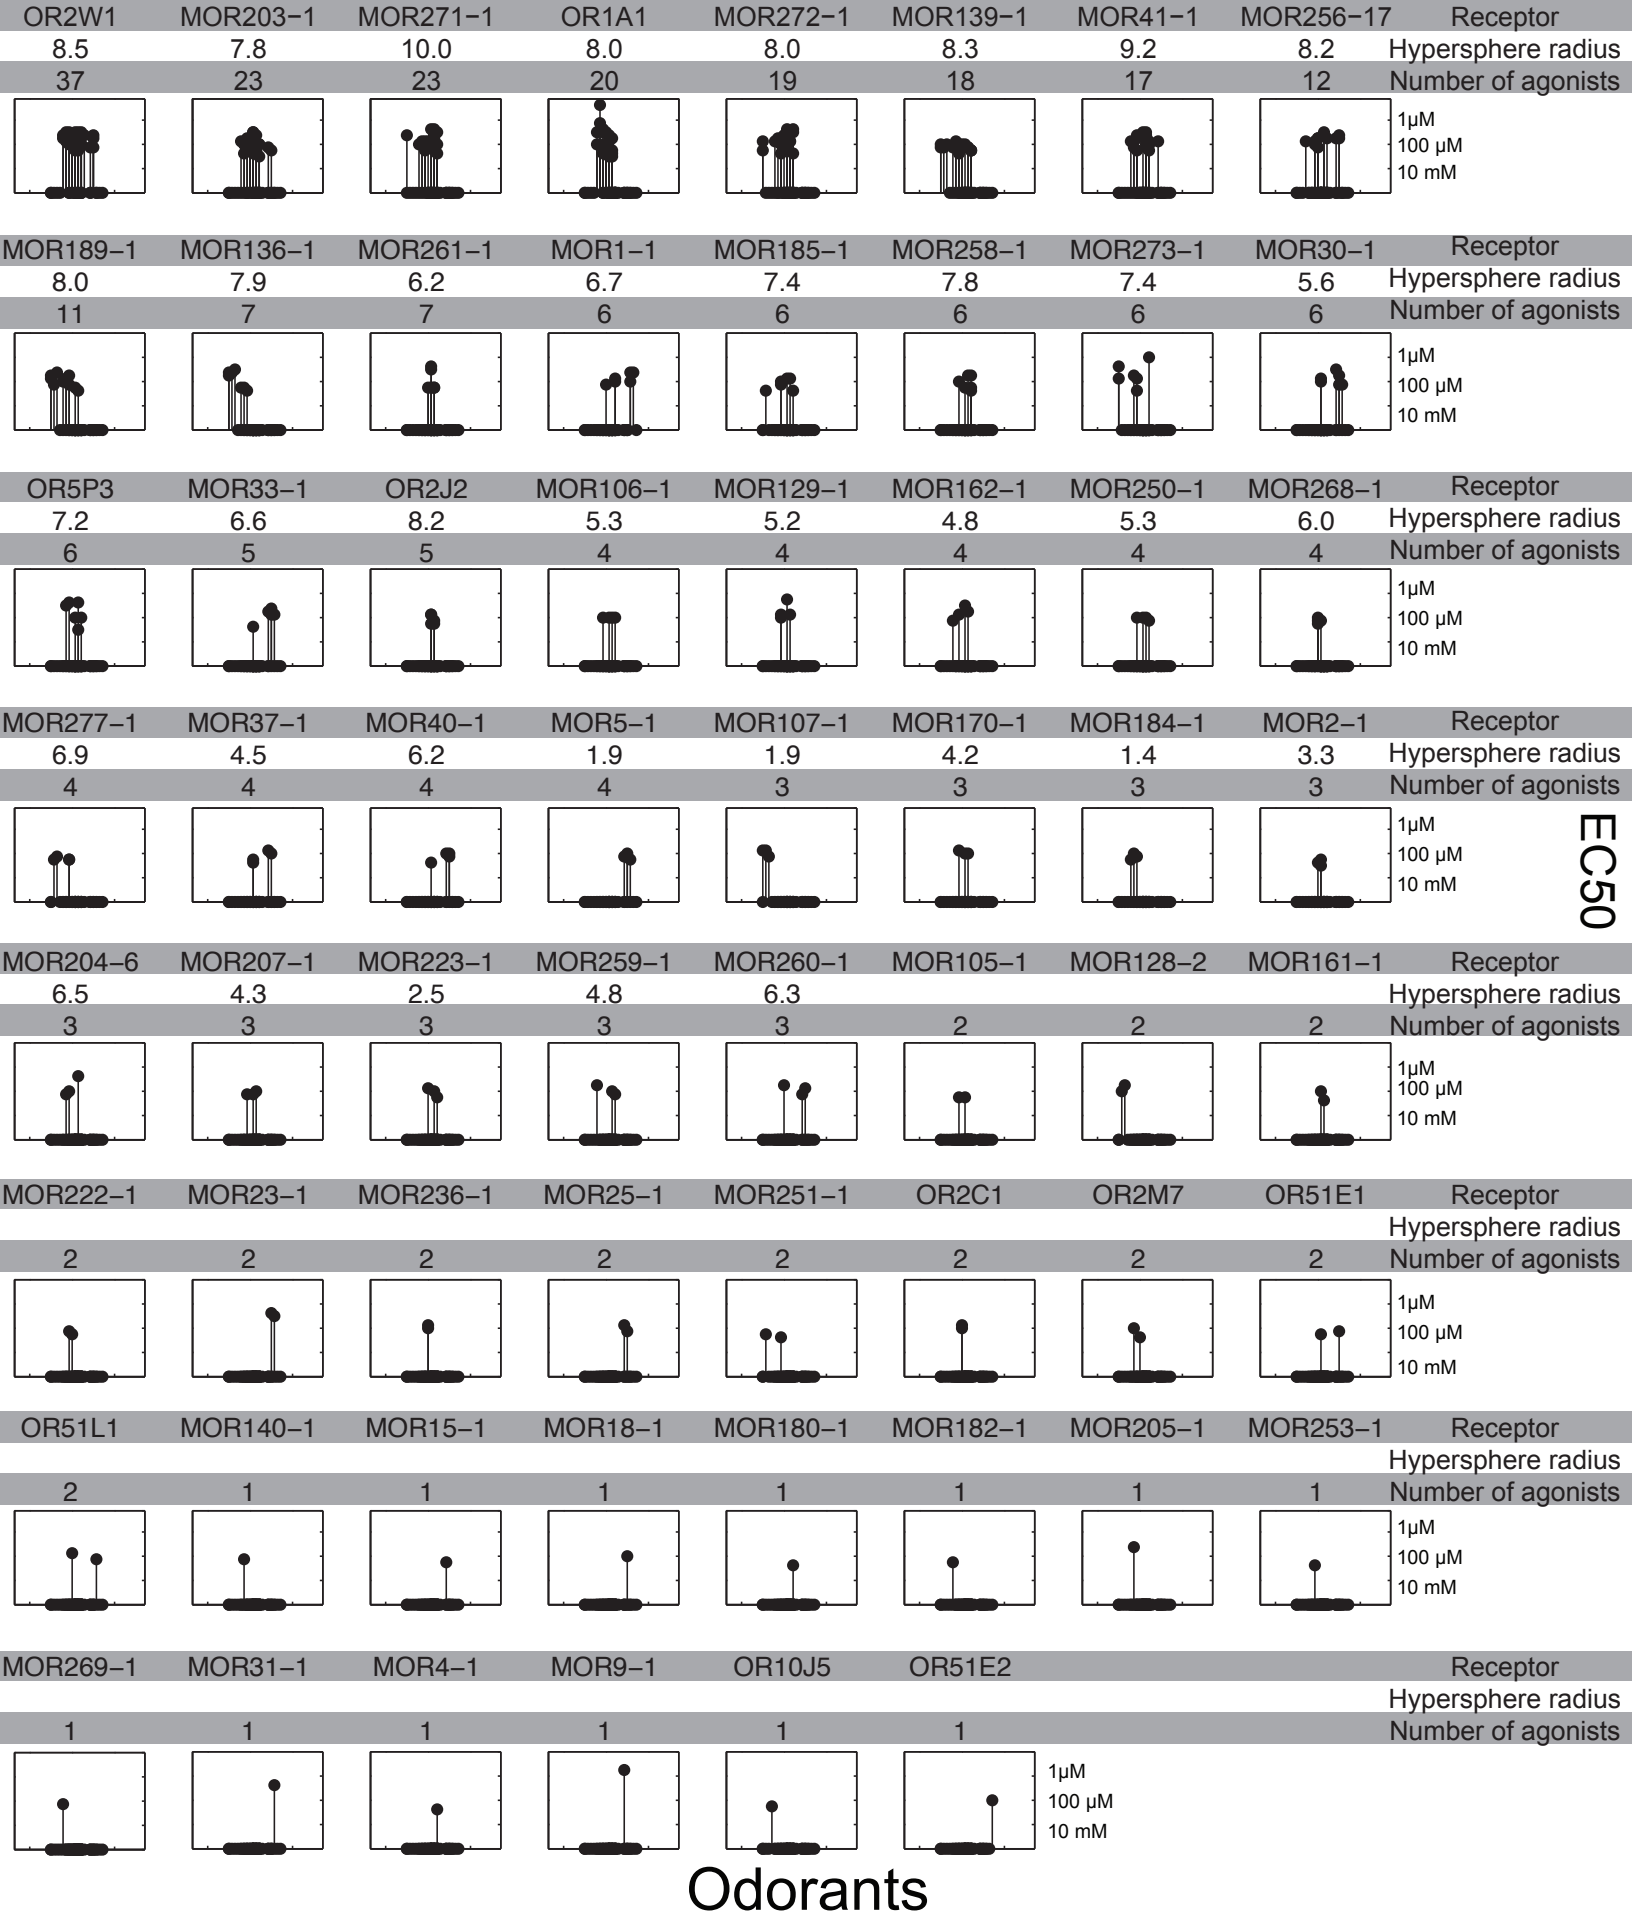

EC50

## Odorants

**Figure S7.** One-dimensional tuning curves. The 63 odorants are plotted along the x-axis of each subplot according to the first principal component of the odorant in Haddad et al.'s odor space (Haddad et al., 2008, Nature Methods, 5(5), 425-9). The order of odorants is the same for different receptors. The y-axis is the EC50 of the odorant-receptor interaction. The 62 tuning-curve graphs are ordered by the number of agonists for each receptor.

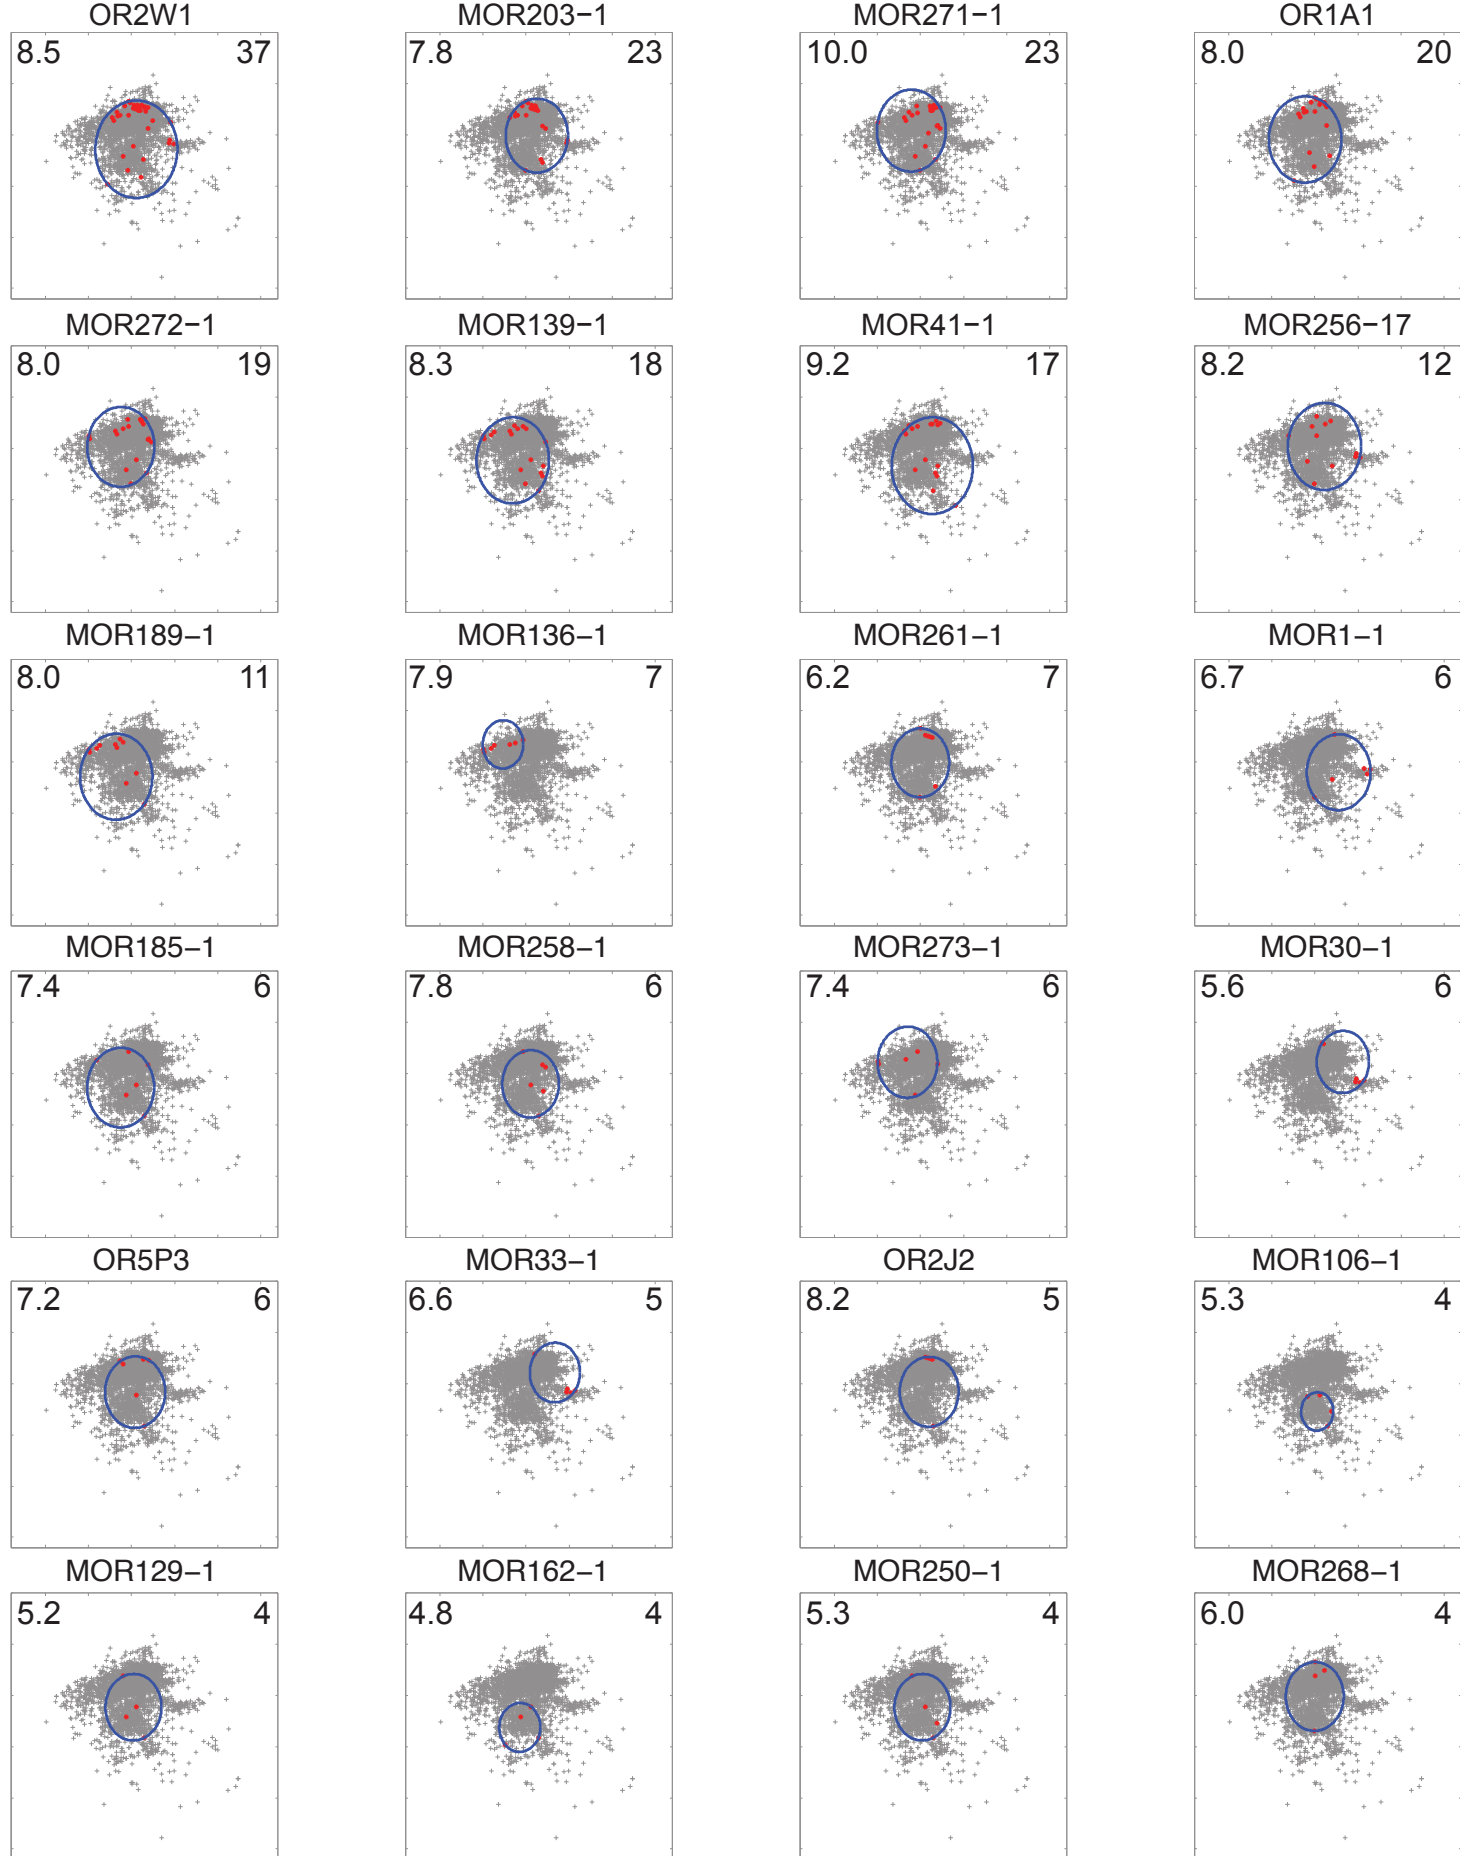

**Figure S8.** Two-dimensional tuning plots. A two-dimensional projection of 2,683 odorants in Haddad et al.'s odor space (Haddad et al., 2008, *Nature Methods*, 5(5), 425-9) is plotted in grey. A given receptor's agonists are plotted in red in the respective subplots. A circle circumscribing all agonists is drawn in blue. The 62 tuning-curve graphs are ordered by the number of agonists for each receptor. In the upper left of each subplot is the radius of a hypersphere enclosing all of the receptor's agonists; in the upper right is the number of agonists.

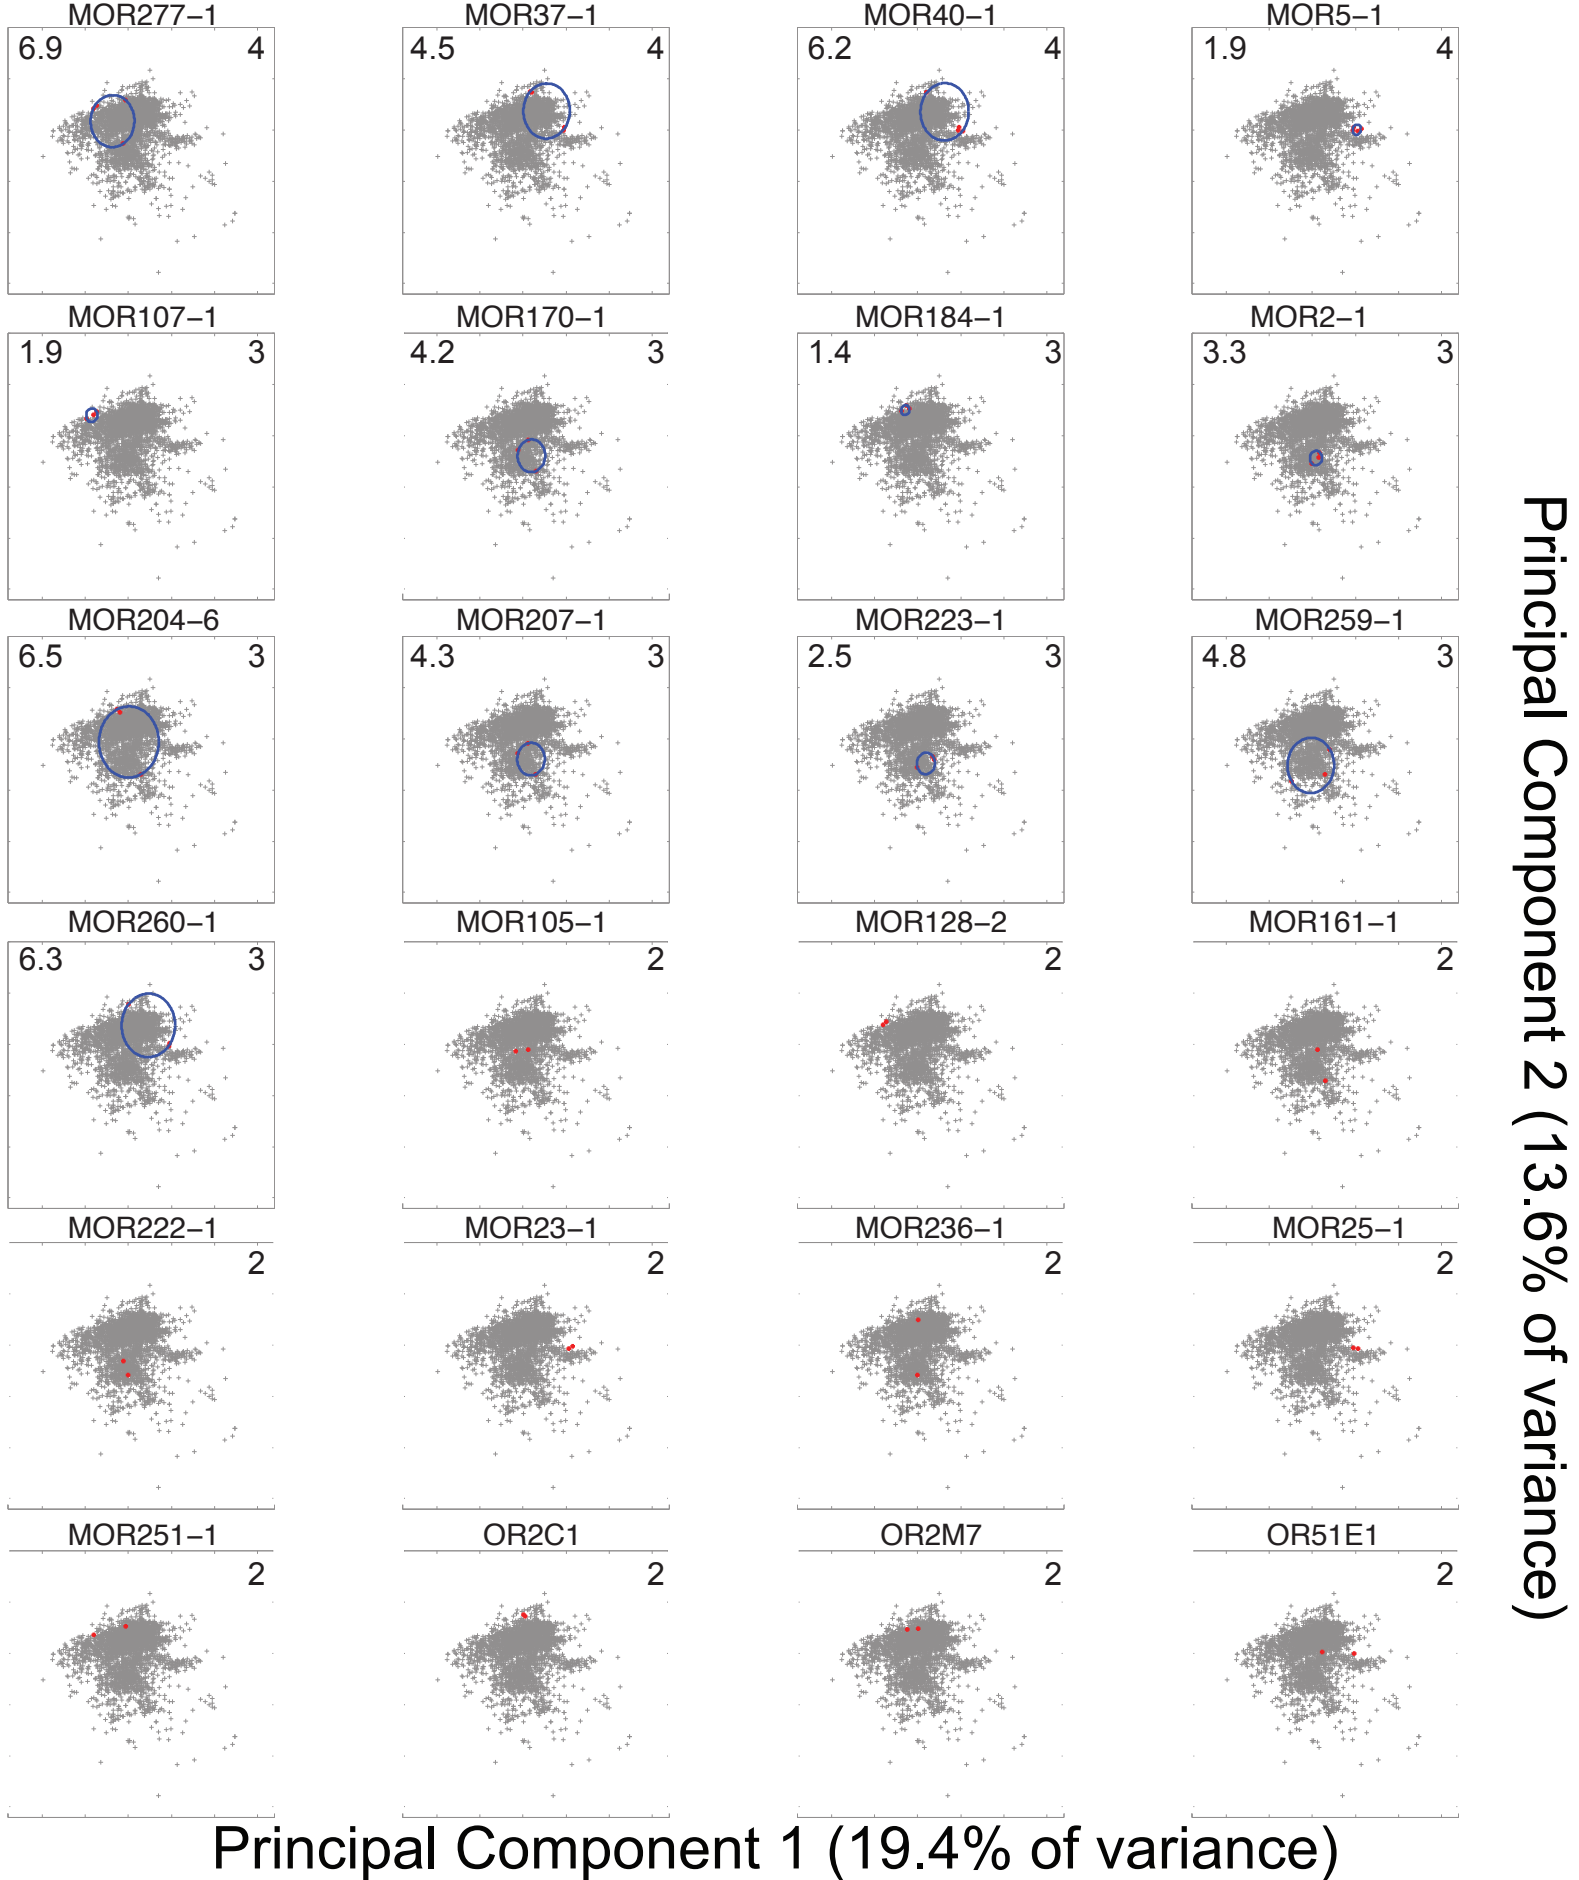

**Figure S8 (continued).** Two-dimensional tuning plots. A two-dimensional projection of 2,683 odorants in Haddad et al.'s odor space (Haddad et al., 2008, *Nature Methods*, 5(5), 425-9) is plotted in grey. A given receptor's agonists are plotted in red in the respective subplots. A circle circumscribing all agonists is drawn in blue. The 62 tuning-curve graphs are ordered by the number of agonists for each receptor. In the upper left of each subplot is the radius of a hypersphere enclosing all of the receptor's agonists; in the upper right is the number of agonists.

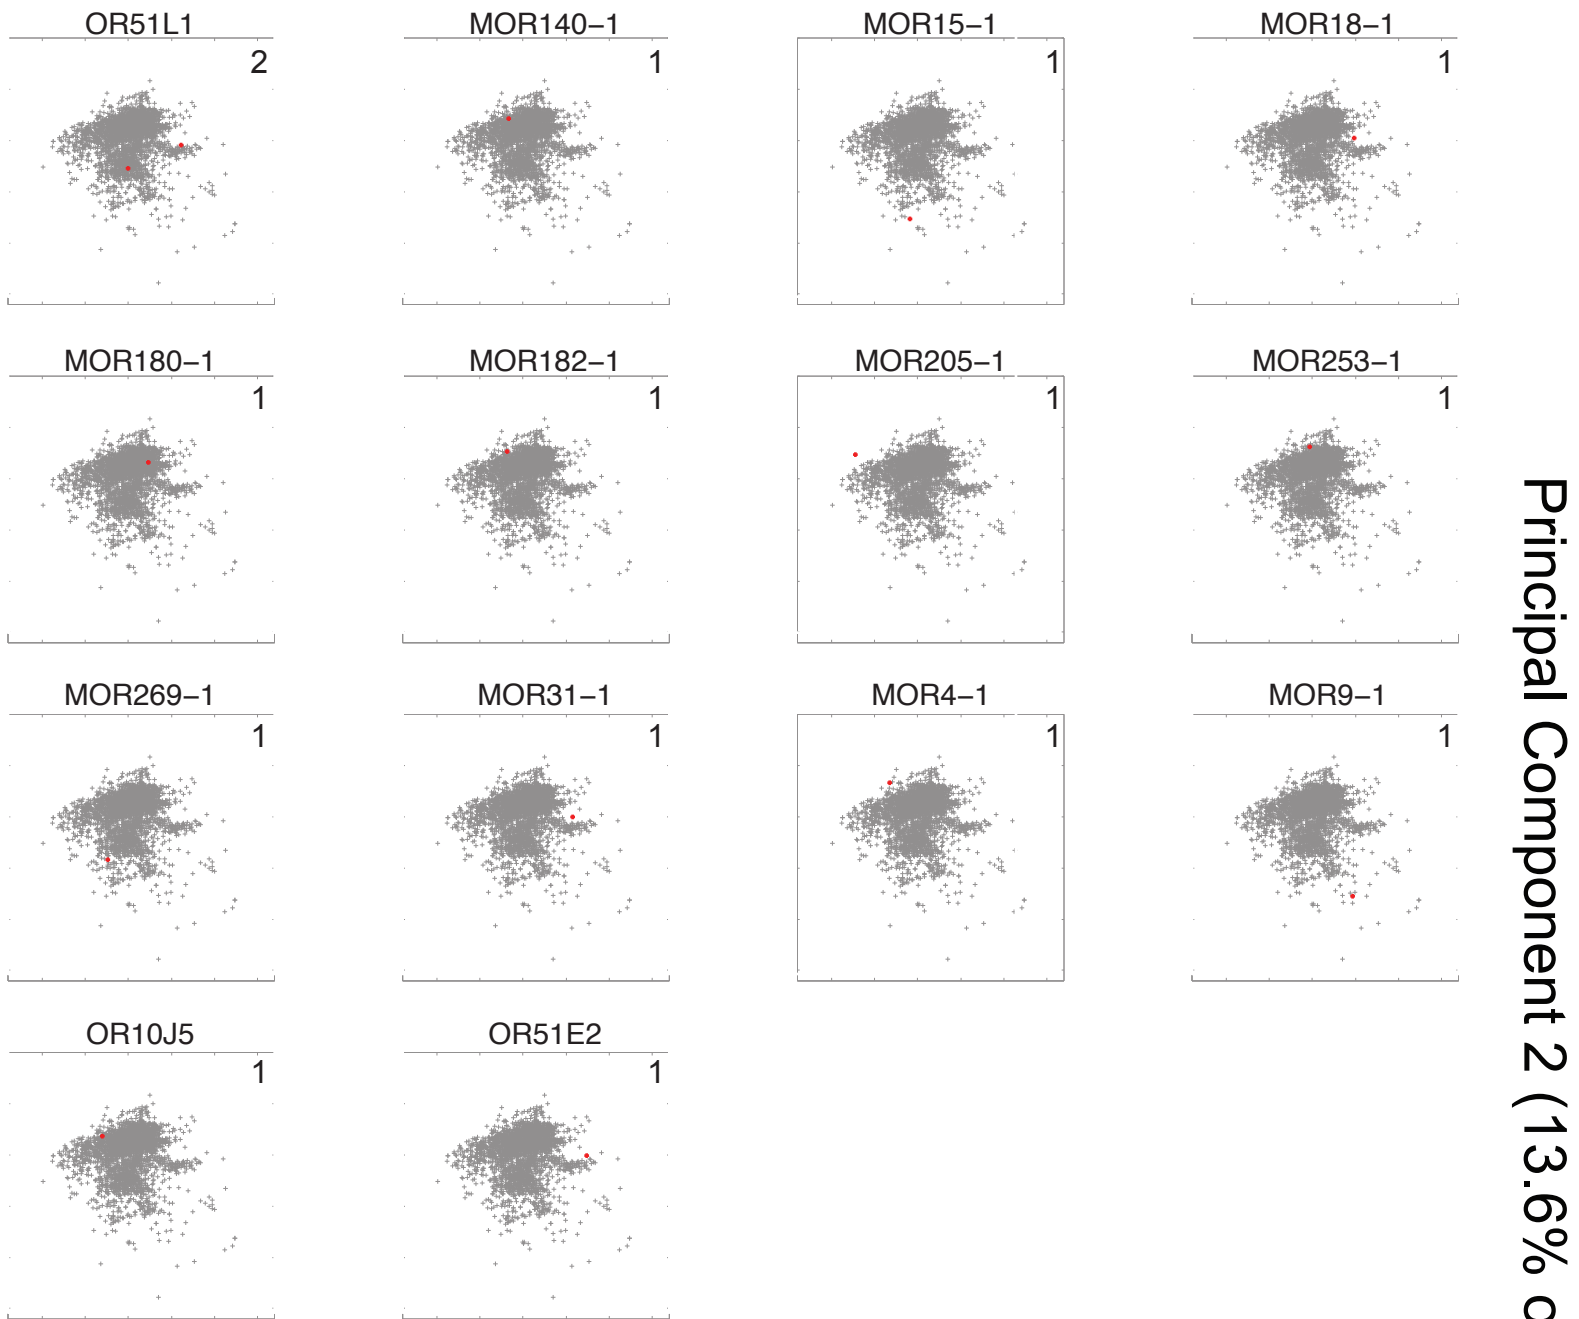

Principal Component 2 (13.6% of variance)

## Principal Component 1 (19.4% of variance)

**Figure S8 (continued).** Two-dimensional tuning plots. A two-dimensional projection of 2,683 odorants in Haddad et al.'s odor space (Haddad et al., 2008, Nature Methods, 5(5), 425-9) is plotted in grey. A given receptor's agonists are plotted in red in the respective subplots. A circle circumscribing all agonists is drawn in blue. The 62 tuning-curve graphs are ordered by the number of agonists for each receptor. In the upper left of each subplot is the radius of a hypersphere enclosing all of the receptor's agonists; in the upper right is the number of agonists.



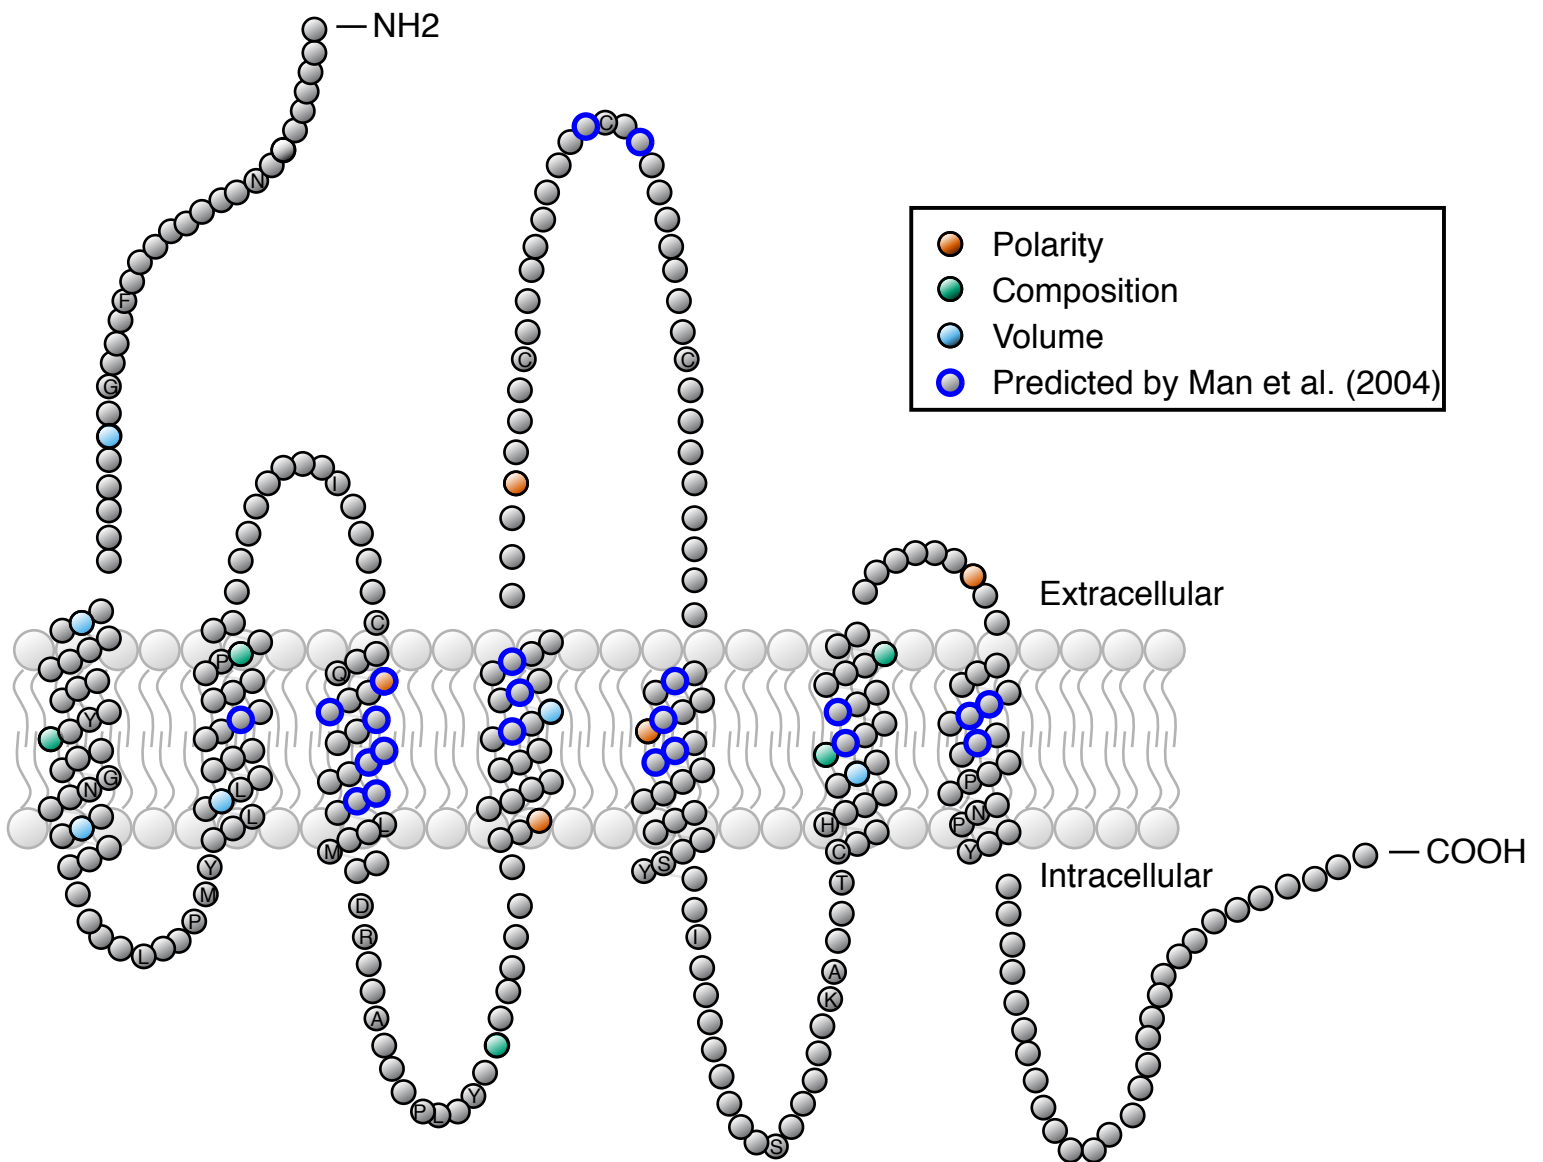

**Figure S9.** Snake plot of a typical OR in which amino acid residues with ligand-specificity-determining properties are highlighted. Residue properties selected by the greedy optimization algorithm are indicated by color. Residues previously predicted to be ligand-specificity determining (Man et al., 2004, *Protein Sci*, 13(1), 240-54) are outlined in dark blue. Note that only one of the previously predicted residues (in the third transmembrane domain) was selected by our algorithm. Amino acid positions conserved in at least 90% of the 1425 receptors are labeled with their single-letter amino acid code. Abbreviations for the amino acid residues are as follows: A, Ala; C, Cys; D, Asp; F, Phe; G, Gly; H, His; I, Ile; K, Lys; L, Leu; M, Met; N, Asn; P, Pro; Q, Gln; R, Arg; S, Ser; T, Thr; and Y, Tyr.

Number of agonists

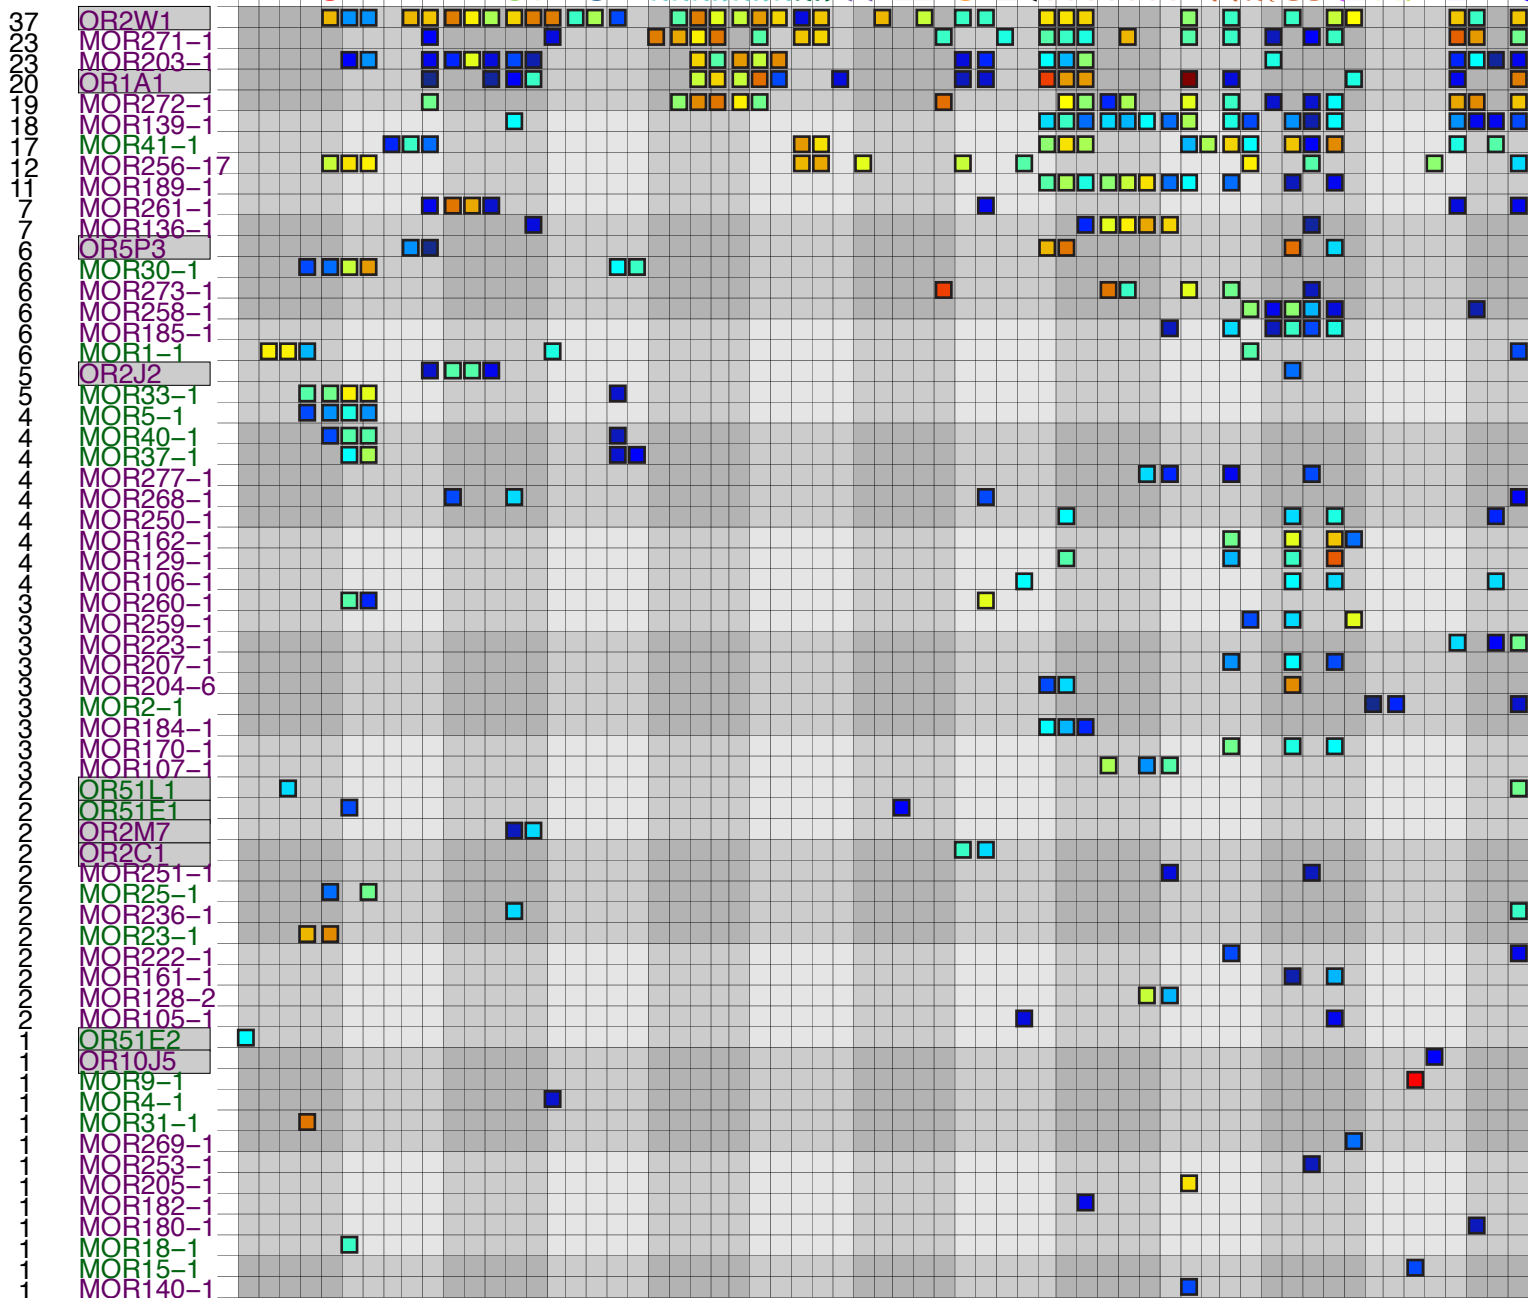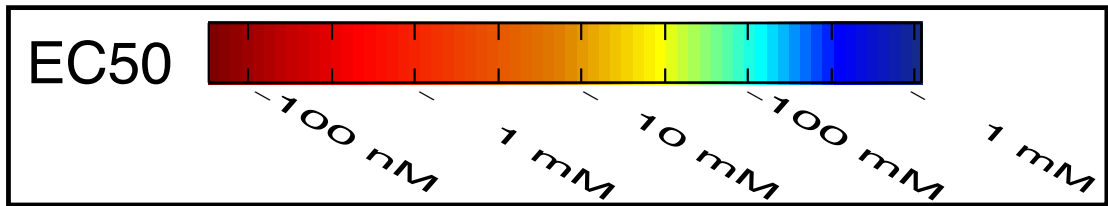

Figure S10. EC50 values for 62 odorant receptors and 63 odorants. Class I receptors are shown in green, class II receptors in purple on the y-axis. Human odorant receptors have a gray background. Receptors are ordered according to the number of agonists identified in our dataset. Odorants are colored by functional group on the x-axis: Red=Aliphatic carboxylic acids, Light green=Aliphatic alcohols, Turquoise=Aliphatic aldehydes, Light blue=Aliphatic ketones, Green = Diketones, Dark purple=Aliphatic esters, Orange=Thiols, Black=Aromatics, Rust=Cyclic ketones, Light purple=Aliphatic aromatic ketones, Yellow=Aromatic carboxylic acids, Cherry=aromatic aldehyde, Blue=Aliphatic esters.

**Odorant Set 1**

Pentanoic acid  
 Propionic acid  
 Hexanoic acid  
 Heptanoic acid  
 Octanoic Acid  
 Nonanoic acid  
 Decanoic acid  
 Isovaleric acid  
 Thioglycolic acid  
 Nonanedioic acid  
 Vanillic acid  
 (+)-2-Phenylbutyric acid  
 (-)-2-Phenylbutyric acid

**Odorant Set 2**

4-Hydroxycoumarin  
 4-Chromanone  
 2-Coumaranone  
 $\gamma$ -Caprolactone  
 Coumarin  
 Cyclohexanone

**Odorant Set 3**

2-Butanone  
 2-Pentanone  
 2-Hexanone  
 2-Heptanone  
 3-Heptanone  
 2-Octanone  
 3-Octanone  
 2-Nonanone  
 2,3-Hexanedione  
 3,4-Hexanedione  
 (+)-Carvone  
 (-)-Carvone  
 (+)-Dihydrocarvone  
 (-)-Fenchone  
 (+)-Fenchone  
 (+)-Camphor  
 (-)-Camphor  
 Dihydrojasmonone  
 Acetophenone  
 Benzophenone  
 (+)-Pulegone  
 2-Furyl methyl ketone  
 Dimedone  
 (-)-Menthone  
 Ionone

**Odorant set 4**

tert-Butyl propionate  
 Methyl butyrate  
 Propyl butyrate  
 Pentyl acetate  
 Allyl heptanoate  
 Amyl hexanoate  
 Amyl butyrate  
 Butyl heptanoate  
 Heptyl isobutyrate  
 Hexyl acetate  
 Butyl butyryllactate  
 Butyl formate  
 Ethyl pyruvate  
 Isoamyl acetate  
 Ethyl isobutyrate  
 Prenyl acetate

**Odorant set 5**

1-Butanol  
 1-Propanol  
 1-Pentanol  
 1-Hexanol  
 1-Heptanol  
 1-Octanol  
 1-Nonanol  
 1-Decanol  
 (+)-2-Heptanol  
 (-)-2-Octanol  
 (+)-2-Octanol  
 (-)- $\beta$ -Citronellol  
 Geraniol  
 Linalool  
 1-Undecanol

**Odorant set 6**

Allyl phenylacetate  
 Benzene  
 Benzyl acetate  
 Allylbenzene  
 Phenyl acetate  
 Prenyl acetate

**Odorant set 7**

Octanethiol  
 Nonanethiol

**Odorant set 8**

Butanal  
 Pentanal  
 Hexanal  
 Heptanal  
 Octanal  
 Nonanal  
 Decanal  
 Acetal  
 Citral  
 Hydroxycitronellal  
 Lyrall

Supplementary Table 2: Odorants used to screen the receptor libraries. During the mixture screening stage the odorants were divided by functional group into 8 mixtures as indicated. Note that prenyl acetate was used in two different mixtures.

|           | (+)-2-Phenylbutyric acid | (+)-Camphor | (+)-Carvone | (+)-Dihydrocarvone | (+)-Fenchone | (-)-2-Phenylbutyric acid | (-)-Camphor |
|-----------|--------------------------|-------------|-------------|--------------------|--------------|--------------------------|-------------|
| MOR1-1    | 0                        | 0           | 0           | 0                  | 0            | 0                        | 0           |
| MOR105-1  | 0                        | 0           | 0           | 0                  | 0            | 0                        | 0           |
| MOR106-1  | 0                        | 0           | 0           | 0                  | 0            | 0                        | 0           |
| MOR107-1  | 0                        | -4.15       | 0           | 0                  | 0            | 0                        | -3.704      |
| MOR128-2  | 0                        | -3.772      | 0           | 0                  | 0            | 0                        | -4.373      |
| MOR129-1  | 0                        | 0           | -4.145      | 0                  | 0            | 0                        | 0           |
| MOR136-1  | 0                        | -4.749      | 0           | -3.498             | -4.626       | 0                        | -4.952      |
| MOR139-1  | 0                        | -3.681      | -4.032      | -3.637             | -3.773       | 0                        | -3.902      |
| MOR140-1  | 0                        | 0           | 0           | 0                  | 0            | 0                        | 0           |
| MOR15-1   | 0                        | 0           | 0           | 0                  | 0            | 0                        | 0           |
| MOR161-1  | 0                        | 0           | 0           | 0                  | 0            | 0                        | 0           |
| MOR162-1  | 0                        | 0           | 0           | 0                  | 0            | 0                        | 0           |
| MOR170-1  | 0                        | 0           | 0           | 0                  | 0            | 0                        | 0           |
| MOR18-1   | 0                        | 0           | 0           | 0                  | 0            | 0                        | 0           |
| MOR180-1  | 0                        | 0           | 0           | 0                  | 0            | 0                        | 0           |
| MOR182-1  | 0                        | 0           | 0           | -3.406             | 0            | 0                        | 0           |
| MOR184-1  | 0                        | 0           | -3.812      | -3.55              | 0            | 0                        | 0           |
| MOR185-1  | 0                        | -3.18       | 0           | 0                  | 0            | 0                        | 0           |
| MOR189-1  | 0                        | -3.631      | -4.302      | -3.976             | -4.423       | 0                        | -4.639      |
| MOR2-1    | -3.499                   | 0           | 0           | 0                  | 0            | -2.982                   | 0           |
| MOR203-1  | 0                        | 0           | -3.814      | -4.241             | 0            | 0                        | 0           |
| MOR204-6  | 0                        | 0           | -3.85       | 0                  | 0            | 0                        | 0           |
| MOR205-1  | 0                        | 0           | 0           | 0                  | 0            | 0                        | 0           |
| MOR207-1  | 0                        | 0           | 0           | 0                  | 0            | 0                        | 0           |
| MOR222-1  | 0                        | 0           | 0           | 0                  | 0            | 0                        | 0           |
| MOR223-1  | 0                        | 0           | 0           | 0                  | 0            | 0                        | 0           |
| MOR23-1   | 0                        | 0           | 0           | 0                  | 0            | 0                        | 0           |
| MOR236-1  | 0                        | 0           | 0           | 0                  | 0            | 0                        | 0           |
| MOR25-1   | 0                        | 0           | 0           | 0                  | 0            | 0                        | 0           |
| MOR250-1  | 0                        | 0           | -3.938      | 0                  | 0            | 0                        | 0           |
| MOR251-1  | 0                        | -3.31       | 0           | 0                  | 0            | 0                        | 0           |
| MOR253-1  | 0                        | 0           | 0           | 0                  | 0            | 0                        | 0           |
| MOR256-17 | 0                        | 0           | 0           | 0                  | 0            | 0                        | 0           |
| MOR258-1  | 0                        | 0           | 0           | 0                  | 0            | 0                        | 0           |
| MOR259-1  | 0                        | 0           | 0           | 0                  | 0            | 0                        | 0           |
| MOR260-1  | 0                        | 0           | 0           | 0                  | 0            | 0                        | 0           |
| MOR261-1  | 0                        | 0           | 0           | 0                  | 0            | 0                        | 0           |
| MOR268-1  | 0                        | 0           | 0           | 0                  | 0            | 0                        | 0           |
| MOR269-1  | 0                        | 0           | 0           | 0                  | 0            | 0                        | 0           |
| MOR271-1  | 0                        | 0           | -4.096      | -3.987             | -4.869       | 0                        | 0           |
| MOR272-1  | 0                        | 0           | -4.564      | -4.273             | -4.36        | 0                        | 0           |
| MOR273-1  | 0                        | 0           | 0           | 0                  | -4.073       | 0                        | 0           |
| MOR277-1  | 0                        | -3.519      | 0           | 0                  | 0            | 0                        | -3.861      |
| MOR30-1   | 0                        | 0           | 0           | 0                  | 0            | 0                        | 0           |
| MOR31-1   | 0                        | 0           | 0           | 0                  | 0            | 0                        | 0           |
| MOR33-1   | 0                        | 0           | 0           | 0                  | 0            | 0                        | 0           |
| MOR37-1   | 0                        | 0           | 0           | 0                  | 0            | 0                        | 0           |
| MOR4-1    | 0                        | 0           | 0           | 0                  | 0            | 0                        | 0           |
| MOR40-1   | 0                        | 0           | 0           | 0                  | 0            | 0                        | 0           |
| MOR41-1   | 0                        | 0           | -4.644      | -4.301             | 0            | 0                        | 0           |
| MOR5-1    | 0                        | 0           | 0           | 0                  | 0            | 0                        | 0           |
| MOR9-1    | 0                        | 0           | 0           | 0                  | 0            | 0                        | 0           |
| OR10J5    | 0                        | 0           | 0           | 0                  | 0            | 0                        | 0           |
| OR1A1     | 0                        | 0           | -5.035      | -4.992             | 0            | 0                        | 0           |
| OR2C1     | 0                        | 0           | 0           | 0                  | 0            | 0                        | 0           |
| OR2J2     | 0                        | 0           | 0           | 0                  | 0            | 0                        | 0           |
| OR2M7     | 0                        | 0           | 0           | 0                  | 0            | 0                        | 0           |
| OR2W1     | 0                        | 0           | -4.646      | -4.755             | 0            | 0                        | 0           |
| OR51E1    | 0                        | 0           | 0           | 0                  | 0            | 0                        | 0           |
| OR51E2    | 0                        | 0           | 0           | 0                  | 0            | 0                        | 0           |
| OR51L1    | 0                        | 0           | 0           | 0                  | 0            | 0                        | 0           |
| OR5P3     | 0                        | 0           | -5.173      | 0                  | 0            | 0                        | 0           |

Table S3. The numerical EC50 values (log M) displayed in Fig. 1

|           | (-)-Carvone | (-)-Fenchone | (-)-b-Citronellol | 1-Decanol | 1-Heptanol | 1-Hexanol | 1-Nonanol | 1-Octanol | 1-Pentanol |
|-----------|-------------|--------------|-------------------|-----------|------------|-----------|-----------|-----------|------------|
| MOR1-1    | 0           | 0            | 0                 | 0         | 0          | 0         | 0         | 0         | 0          |
| MOR105-1  | 0           | 0            | 0                 | 0         | 0          | 0         | 0         | 0         | 0          |
| MOR106-1  | 0           | 0            | 0                 | 0         | 0          | 0         | 0         | 0         | 0          |
| MOR107-1  | 0           | -4.302       | 0                 | 0         | 0          | 0         | 0         | 0         | 0          |
| MOR128-2  | 0           | 0            | 0                 | 0         | 0          | 0         | 0         | 0         | 0          |
| MOR129-1  | 0           | 0            | 0                 | 0         | 0          | 0         | 0         | 0         | 0          |
| MOR136-1  | 0           | -4.481       | -3.347            | 0         | 0          | 0         | 0         | 0         | 0          |
| MOR139-1  | -3.861      | -3.879       | 0                 | 0         | 0          | 0         | 0         | 0         | 0          |
| MOR140-1  | 0           | 0            | 0                 | 0         | 0          | 0         | 0         | 0         | 0          |
| MOR15-1   | 0           | 0            | 0                 | 0         | 0          | 0         | 0         | 0         | 0          |
| MOR161-1  | 0           | 0            | 0                 | 0         | 0          | 0         | 0         | 0         | 0          |
| MOR162-1  | 0           | 0            | 0                 | 0         | 0          | 0         | 0         | 0         | 0          |
| MOR170-1  | 0           | 0            | 0                 | 0         | 0          | 0         | 0         | 0         | 0          |
| MOR18-1   | 0           | 0            | 0                 | 0         | 0          | 0         | 0         | 0         | 0          |
| MOR180-1  | 0           | 0            | 0                 | 0         | 0          | 0         | 0         | 0         | 0          |
| MOR182-1  | 0           | 0            | 0                 | 0         | 0          | 0         | 0         | 0         | 0          |
| MOR184-1  | -3.92       | 0            | 0                 | 0         | 0          | 0         | 0         | 0         | 0          |
| MOR185-1  | 0           | 0            | 0                 | 0         | 0          | 0         | 0         | 0         | 0          |
| MOR189-1  | -4.147      | -4.239       | 0                 | 0         | 0          | 0         | 0         | 0         | 0          |
| MOR2-1    | 0           | 0            | 0                 | 0         | 0          | 0         | 0         | 0         | 0          |
| MOR203-1  | -3.936      | 0            | -3.147            | -3.299    | -3.387     | 0         | -4.456    | -3.563    | 0          |
| MOR204-6  | -3.625      | 0            | 0                 | 0         | 0          | 0         | 0         | 0         | 0          |
| MOR205-1  | 0           | 0            | 0                 | 0         | 0          | 0         | 0         | 0         | 0          |
| MOR207-1  | 0           | 0            | 0                 | 0         | 0          | 0         | 0         | 0         | 0          |
| MOR222-1  | 0           | 0            | 0                 | 0         | 0          | 0         | 0         | 0         | 0          |
| MOR223-1  | 0           | 0            | 0                 | 0         | 0          | 0         | 0         | 0         | 0          |
| MOR23-1   | 0           | 0            | 0                 | 0         | 0          | 0         | 0         | 0         | 0          |
| MOR236-1  | 0           | 0            | 0                 | 0         | 0          | 0         | 0         | 0         | 0          |
| MOR25-1   | 0           | 0            | 0                 | 0         | 0          | 0         | 0         | 0         | 0          |
| MOR250-1  | 0           | 0            | 0                 | 0         | 0          | 0         | 0         | 0         | 0          |
| MOR251-1  | 0           | 0            | 0                 | 0         | 0          | 0         | 0         | 0         | 0          |
| MOR253-1  | 0           | 0            | 0                 | 0         | 0          | 0         | 0         | 0         | 0          |
| MOR256-17 | 0           | 0            | 0                 | 0         | 0          | 0         | 0         | 0         | 0          |
| MOR258-1  | 0           | 0            | 0                 | 0         | 0          | 0         | 0         | 0         | 0          |
| MOR259-1  | 0           | 0            | 0                 | 0         | 0          | 0         | 0         | 0         | 0          |
| MOR260-1  | 0           | 0            | 0                 | 0         | 0          | 0         | 0         | 0         | 0          |
| MOR261-1  | 0           | 0            | 0                 | -3.273    | -3.382     | 0         | -4.914    | -5.192    | 0          |
| MOR268-1  | 0           | 0            | 0                 | 0         | 0          | 0         | 0         | -3.63     | 0          |
| MOR269-1  | 0           | 0            | 0                 | 0         | 0          | 0         | 0         | 0         | 0          |
| MOR271-1  | -4.14       | 0            | 0                 | 0         | -3.47      | 0         | 0         | 0         | 0          |
| MOR272-1  | 0           | -3.558       | 0                 | 0         | -4.181     | 0         | 0         | 0         | 0          |
| MOR273-1  | 0           | -5.231       | 0                 | 0         | 0          | 0         | 0         | 0         | 0          |
| MOR277-1  | 0           | 0            | 0                 | 0         | 0          | 0         | 0         | 0         | 0          |
| MOR30-1   | 0           | 0            | 0                 | 0         | 0          | 0         | 0         | 0         | 0          |
| MOR31-1   | 0           | 0            | 0                 | 0         | 0          | 0         | 0         | 0         | 0          |
| MOR33-1   | 0           | 0            | 0                 | 0         | 0          | 0         | 0         | 0         | 0          |
| MOR37-1   | 0           | 0            | 0                 | 0         | 0          | 0         | 0         | 0         | 0          |
| MOR4-1    | 0           | 0            | 0                 | 0         | 0          | 0         | 0         | 0         | 0          |
| MOR40-1   | 0           | 0            | 0                 | 0         | 0          | 0         | 0         | 0         | 0          |
| MOR41-1   | -4.257      | 0            | 0                 | 0         | -3.68      | -4.064    | 0         | 0         | -3.537     |
| MOR5-1    | 0           | 0            | 0                 | 0         | 0          | 0         | 0         | 0         | 0          |
| MOR9-1    | 0           | 0            | 0                 | 0         | 0          | 0         | 0         | 0         | 0          |
| OR10J5    | 0           | 0            | 0                 | 0         | 0          | 0         | 0         | 0         | 0          |
| OR1A1     | -5.765      | 0            | -4.039            | -3.082    | -3.013     | 0         | 0         | 0         | 0          |
| OR2C1     | 0           | 0            | 0                 | 0         | 0          | 0         | 0         | 0         | 0          |
| OR2J2     | 0           | 0            | 0                 | -3.416    | -3.271     | 0         | -4.16     | -4.16     | 0          |
| OR2M7     | 0           | 0            | -3.853            | 0         | 0          | 0         | 0         | 0         | 0          |
| OR2W1     | -4.657      | 0            | -5.106            | -4.365    | -4.831     | -4.852    | -4.63     | -5.128    | 0          |
| OR51E1    | 0           | 0            | 0                 | 0         | 0          | 0         | 0         | 0         | 0          |
| OR51E2    | 0           | 0            | 0                 | 0         | 0          | 0         | 0         | 0         | 0          |
| OR51L1    | 0           | 0            | 0                 | 0         | 0          | 0         | 0         | 0         | 0          |
| OR5P3     | -4.846      | 0            | 0                 | 0         | -2.962     | -3.758    | 0         | 0         | 0          |

Table S3. The numerical EC50 values (log M) displayed in Fig. 1

|           | 2-Coumaranone | 2-Heptanone | 2-Hexanone | 2-Nonanone | 2-Octanone | 2-Pentanone | 2,3-Hexanedione | 3-Heptanone |
|-----------|---------------|-------------|------------|------------|------------|-------------|-----------------|-------------|
| MOR1-1    | -4.138        | 0           | 0          | 0          | 0          | 0           | 0               | 0           |
| MOR105-1  | 0             | 0           | 0          | 0          | 0          | 0           | 0               | 0           |
| MOR106-1  | 0             | 0           | 0          | 0          | 0          | 0           | 0               | 0           |
| MOR107-1  | 0             | 0           | 0          | 0          | 0          | 0           | 0               | 0           |
| MOR128-2  | 0             | 0           | 0          | 0          | 0          | 0           | 0               | 0           |
| MOR129-1  | 0             | 0           | 0          | 0          | 0          | 0           | 0               | 0           |
| MOR136-1  | 0             | 0           | 0          | 0          | 0          | 0           | 0               | 0           |
| MOR139-1  | -3.585        | 0           | 0          | 0          | 0          | 0           | 0               | 0           |
| MOR140-1  | 0             | 0           | 0          | 0          | 0          | 0           | 0               | 0           |
| MOR15-1   | 0             | 0           | 0          | 0          | 0          | 0           | 0               | 0           |
| MOR161-1  | 0             | 0           | 0          | 0          | 0          | 0           | 0               | 0           |
| MOR162-1  | 0             | 0           | 0          | 0          | 0          | 0           | 0               | 0           |
| MOR170-1  | 0             | 0           | 0          | 0          | 0          | 0           | 0               | 0           |
| MOR18-1   | 0             | 0           | 0          | 0          | 0          | 0           | 0               | 0           |
| MOR180-1  | 0             | 0           | 0          | 0          | 0          | 0           | 0               | 0           |
| MOR182-1  | 0             | 0           | 0          | 0          | 0          | 0           | 0               | 0           |
| MOR184-1  | 0             | 0           | 0          | 0          | 0          | 0           | 0               | 0           |
| MOR185-1  | 0             | 0           | 0          | 0          | 0          | 0           | 0               | 0           |
| MOR189-1  | 0             | 0           | 0          | 0          | 0          | 0           | 0               | 0           |
| MOR2-1    | 0             | 0           | 0          | 0          | 0          | 0           | 0               | 0           |
| MOR203-1  | 0             | -4.76       | 0          | -5.064     | -5.023     | 0           | 0               | -4.099      |
| MOR204-6  | 0             | 0           | 0          | 0          | 0          | 0           | 0               | 0           |
| MOR205-1  | 0             | 0           | 0          | 0          | 0          | 0           | 0               | 0           |
| MOR207-1  | 0             | 0           | 0          | 0          | 0          | 0           | 0               | 0           |
| MOR222-1  | 0             | 0           | 0          | 0          | 0          | 0           | 0               | 0           |
| MOR223-1  | 0             | 0           | 0          | 0          | 0          | 0           | 0               | 0           |
| MOR23-1   | 0             | 0           | 0          | 0          | 0          | 0           | 0               | 0           |
| MOR236-1  | 0             | 0           | 0          | 0          | 0          | 0           | 0               | 0           |
| MOR25-1   | 0             | 0           | 0          | 0          | 0          | 0           | 0               | 0           |
| MOR250-1  | 0             | 0           | 0          | 0          | 0          | 0           | 0               | 0           |
| MOR251-1  | 0             | 0           | 0          | 0          | 0          | 0           | 0               | 0           |
| MOR253-1  | 0             | 0           | 0          | 0          | 0          | 0           | 0               | 0           |
| MOR256-17 | -4.575        | 0           | 0          | 0          | 0          | 0           | -4.838          | 0           |
| MOR258-1  | -4.268        | 0           | 0          | 0          | 0          | 0           | 0               | 0           |
| MOR259-1  | -3.63         | 0           | 0          | 0          | 0          | 0           | 0               | 0           |
| MOR260-1  | 0             | 0           | 0          | 0          | 0          | 0           | 0               | 0           |
| MOR261-1  | 0             | 0           | 0          | 0          | 0          | 0           | 0               | 0           |
| MOR268-1  | 0             | 0           | 0          | 0          | 0          | 0           | 0               | 0           |
| MOR269-1  | 0             | 0           | 0          | 0          | 0          | 0           | 0               | 0           |
| MOR271-1  | 0             | -4.581      | -4.936     | 0          | 0          | -5.111      | -4.824          | -5.235      |
| MOR272-1  | 0             | -5.073      | -4.251     | 0          | -4.575     | 0           | 0               | -5.221      |
| MOR273-1  | 0             | 0           | 0          | 0          | 0          | 0           | 0               | 0           |
| MOR277-1  | 0             | 0           | 0          | 0          | 0          | 0           | 0               | 0           |
| MOR30-1   | 0             | 0           | 0          | 0          | 0          | 0           | 0               | 0           |
| MOR31-1   | 0             | 0           | 0          | 0          | 0          | 0           | 0               | 0           |
| MOR33-1   | 0             | 0           | 0          | 0          | 0          | 0           | 0               | 0           |
| MOR37-1   | 0             | 0           | 0          | 0          | 0          | 0           | 0               | 0           |
| MOR4-1    | 0             | 0           | 0          | 0          | 0          | 0           | 0               | 0           |
| MOR40-1   | 0             | 0           | 0          | 0          | 0          | 0           | 0               | 0           |
| MOR41-1   | -3.96         | 0           | 0          | 0          | 0          | 0           | -5.008          | 0           |
| MOR5-1    | 0             | 0           | 0          | 0          | 0          | 0           | 0               | 0           |
| MOR9-1    | 0             | 0           | 0          | 0          | 0          | 0           | 0               | 0           |
| OR10J5    | 0             | 0           | 0          | 0          | 0          | 0           | 0               | 0           |
| OR1A1     | 0             | -4.399      | 0          | -3.577     | -4.37      | 0           | 0               | -4.712      |
| OR2C1     | 0             | 0           | 0          | 0          | 0          | 0           | 0               | 0           |
| OR2J2     | 0             | 0           | 0          | 0          | 0          | 0           | 0               | 0           |
| OR2M7     | 0             | 0           | 0          | 0          | 0          | 0           | 0               | 0           |
| OR2W1     | 0             | -5.142      | -4.135     | -4.701     | -4.399     | 0           | -3.363          | -4.477      |
| OR51E1    | 0             | 0           | 0          | 0          | 0          | 0           | 0               | 0           |
| OR51E2    | 0             | 0           | 0          | 0          | 0          | 0           | 0               | 0           |
| OR51L1    | 0             | 0           | 0          | 0          | 0          | 0           | 0               | 0           |
| OR5P3     | 0             | 0           | 0          | 0          | 0          | 0           | 0               | 0           |

Table S3. The numerical EC50 values (log M) displayed in Fig. 1

|           | 3-Octanone | 34-Hexanedione | 4-Chromanone | 4-Hydroxycoumarin | Acetophenone | Allyl benzene | Allyl heptanoate |
|-----------|------------|----------------|--------------|-------------------|--------------|---------------|------------------|
| MOR1-1    | 0          | 0              | 0            | 0                 | 0            | 0             | 0                |
| MOR105-1  | 0          | 0              | 0            | 0                 | -3.429       | -3.332        | 0                |
| MOR106-1  | 0          | 0              | 0            | 0                 | -3.854       | -3.921        | 0                |
| MOR107-1  | 0          | 0              | 0            | 0                 | 0            | 0             | 0                |
| MOR128-2  | 0          | 0              | 0            | 0                 | 0            | 0             | 0                |
| MOR129-1  | 0          | 0              | -3.785       | 0                 | -5.484       | 0             | 0                |
| MOR136-1  | 0          | 0              | 0            | 0                 | 0            | 0             | 0                |
| MOR139-1  | 0          | 0              | -4.028       | 0                 | -3.935       | 0             | 0                |
| MOR140-1  | 0          | 0              | 0            | 0                 | 0            | 0             | 0                |
| MOR15-1   | 0          | 0              | 0            | 0                 | 0            | 0             | 0                |
| MOR161-1  | 0          | 0              | 0            | 0                 | -3.825       | 0             | 0                |
| MOR162-1  | 0          | 0              | -4.225       | 0                 | -4.778       | 0             | 0                |
| MOR170-1  | 0          | 0              | -4.209       | 0                 | -3.9         | 0             | 0                |
| MOR18-1   | 0          | 0              | 0            | 0                 | 0            | 0             | 0                |
| MOR180-1  | 0          | 0              | 0            | 0                 | 0            | 0             | 0                |
| MOR182-1  | 0          | 0              | 0            | 0                 | 0            | 0             | 0                |
| MOR184-1  | 0          | 0              | 0            | 0                 | 0            | 0             | 0                |
| MOR185-1  | 0          | 0              | -3.833       | 0                 | -4.016       | 0             | 0                |
| MOR189-1  | 0          | 0              | -3.664       | 0                 | -3.372       | 0             | 0                |
| MOR2-1    | 0          | 0              | 0            | 0                 | 0            | 0             | 0                |
| MOR203-1  | -4.4       | 0              | 0            | 0                 | 0            | 0             | 0                |
| MOR204-6  | 0          | 0              | 0            | 0                 | 0            | 0             | 0                |
| MOR205-1  | 0          | 0              | 0            | 0                 | 0            | 0             | 0                |
| MOR207-1  | 0          | 0              | -3.724       | 0                 | -3.606       | 0             | 0                |
| MOR222-1  | 0          | 0              | -3.616       | 0                 | 0            | 0             | 0                |
| MOR223-1  | 0          | 0              | 0            | 0                 | 0            | 0             | 0                |
| MOR23-1   | 0          | 0              | 0            | 0                 | 0            | 0             | 0                |
| MOR236-1  | 0          | 0              | 0            | 0                 | 0            | 0             | 0                |
| MOR25-1   | 0          | 0              | 0            | 0                 | 0            | 0             | 0                |
| MOR250-1  | 0          | 0              | 0            | 0                 | -3.975       | 0             | 0                |
| MOR251-1  | 0          | 0              | 0            | 0                 | 0            | 0             | 0                |
| MOR253-1  | 0          | 0              | 0            | 0                 | 0            | 0             | 0                |
| MOR256-17 | 0          | -4.921         | 0            | 0                 | 0            | -4.146        | 0                |
| MOR258-1  | 0          | 0              | 0            | 0                 | -3.356       | 0             | 0                |
| MOR259-1  | 0          | 0              | 0            | 0                 | 0            | 0             | 0                |
| MOR260-1  | 0          | 0              | 0            | 0                 | 0            | 0             | 0                |
| MOR261-1  | 0          | 0              | 0            | 0                 | 0            | 0             | 0                |
| MOR268-1  | 0          | 0              | 0            | 0                 | 0            | 0             | 0                |
| MOR269-1  | 0          | 0              | 0            | 0                 | 0            | 0             | 0                |
| MOR271-1  | -4.139     | -4.734         | -4.047       | 0                 | -4.05        | 0             | 0                |
| MOR272-1  | -4.197     | 0              | -4.043       | 0                 | -3.922       | 0             | 0                |
| MOR273-1  | 0          | 0              | -4.201       | 0                 | 0            | 0             | 0                |
| MOR277-1  | 0          | 0              | -3.415       | 0                 | 0            | 0             | 0                |
| MOR30-1   | 0          | 0              | 0            | 0                 | 0            | 0             | 0                |
| MOR31-1   | 0          | 0              | 0            | 0                 | 0            | 0             | 0                |
| MOR33-1   | 0          | 0              | 0            | 0                 | 0            | 0             | 0                |
| MOR37-1   | 0          | 0              | 0            | 0                 | 0            | 0             | 0                |
| MOR4-1    | 0          | 0              | 0            | 0                 | 0            | 0             | 0                |
| MOR40-1   | 0          | 0              | 0            | 0                 | 0            | 0             | 0                |
| MOR41-1   | 0          | -4.692         | -4.747       | -4.344            | -5.039       | 0             | 0                |
| MOR5-1    | 0          | 0              | 0            | 0                 | 0            | 0             | 0                |
| MOR9-1    | 0          | 0              | 0            | 0                 | 0            | 0             | 0                |
| OR10J5    | 0          | 0              | 0            | 0                 | 0            | 0             | 0                |
| OR1A1     | -5.291     | 0              | -3.335       | 0                 | 0            | 0             | -3.323           |
| OR2C1     | 0          | 0              | 0            | 0                 | 0            | 0             | 0                |
| OR2J2     | 0          | 0              | 0            | 0                 | 0            | 0             | 0                |
| OR2M7     | 0          | 0              | 0            | 0                 | 0            | 0             | 0                |
| OR2W1     | -5.02      | -4.78          | -4.041       | 0                 | -4.372       | 0             | 0                |
| OR51E1    | 0          | 0              | 0            | 0                 | 0            | 0             | 0                |
| OR51E2    | 0          | 0              | 0            | 0                 | 0            | 0             | 0                |
| OR51L1    | 0          | 0              | 0            | 0                 | 0            | 0             | 0                |
| OR5P3     | 0          | 0              | 0            | 0                 | -3.898       | 0             | 0                |

Table S3. The numerical EC50 values (log M) displayed in Fig. 1

|           | Allyl phenylacetate | Amyl hexanoate | Benzene | Benzophenone | Benzyl acetate | Butyl butyryllactate | Butyl formate | Coumarin |
|-----------|---------------------|----------------|---------|--------------|----------------|----------------------|---------------|----------|
| MOR1-1    | -3.581              | 0              | 0       | 0            | 0              | 0                    | 0             | 0        |
| MOR105-1  | 0                   | 0              | 0       | 0            | 0              | 0                    | 0             | 0        |
| MOR106-1  | 0                   | 0              | 0       | 0            | 0              | 0                    | 0             | -3.919   |
| MOR107-1  | 0                   | 0              | 0       | 0            | 0              | 0                    | 0             | 0        |
| MOR128-2  | 0                   | 0              | 0       | 0            | 0              | 0                    | 0             | 0        |
| MOR129-1  | 0                   | 0              | 0       | 0            | 0              | 0                    | 0             | -4.04    |
| MOR136-1  | 0                   | 0              | 0       | 0            | 0              | 0                    | 0             | 0        |
| MOR139-1  | -3.625              | 0              | 0       | 0            | -3.729         | 0                    | 0             | -3.749   |
| MOR140-1  | 0                   | 0              | 0       | 0            | 0              | 0                    | 0             | 0        |
| MOR15-1   | 0                   | 0              | 0       | 0            | 0              | 0                    | 0             | 0        |
| MOR161-1  | 0                   | 0              | 0       | 0            | 0              | 0                    | 0             | -3.139   |
| MOR162-1  | 0                   | 0              | 0       | -3.666       | 0              | 0                    | 0             | -4.483   |
| MOR170-1  | 0                   | 0              | 0       | 0            | 0              | 0                    | 0             | -3.969   |
| MOR18-1   | 0                   | 0              | 0       | 0            | 0              | 0                    | 0             | 0        |
| MOR180-1  | 0                   | 0              | 0       | 0            | 0              | 0                    | 0             | 0        |
| MOR182-1  | 0                   | 0              | 0       | 0            | 0              | 0                    | 0             | 0        |
| MOR184-1  | 0                   | 0              | 0       | 0            | 0              | 0                    | 0             | 0        |
| MOR185-1  | 0                   | 0              | 0       | 0            | 0              | 0                    | 0             | -4.042   |
| MOR189-1  | 0                   | 0              | 0       | 0            | 0              | 0                    | 0             | -3.215   |
| MOR2-1    | -3.253              | 0              | 0       | 0            | 0              | 0                    | 0             | 0        |
| MOR203-1  | -3.401              | 0              | 0       | 0            | -3.531         | 0                    | 0             | 0        |
| MOR204-6  | 0                   | 0              | 0       | 0            | 0              | 0                    | 0             | -5.099   |
| MOR205-1  | 0                   | 0              | 0       | 0            | 0              | 0                    | 0             | 0        |
| MOR207-1  | 0                   | 0              | 0       | 0            | 0              | 0                    | 0             | -3.905   |
| MOR222-1  | -3.369              | 0              | 0       | 0            | 0              | 0                    | 0             | 0        |
| MOR223-1  | -4.178              | 0              | 0       | 0            | -3.841         | 0                    | 0             | 0        |
| MOR23-1   | 0                   | 0              | 0       | 0            | 0              | 0                    | 0             | 0        |
| MOR236-1  | -4.052              | 0              | 0       | 0            | 0              | 0                    | 0             | 0        |
| MOR25-1   | 0                   | 0              | 0       | 0            | 0              | 0                    | 0             | 0        |
| MOR250-1  | 0                   | 0              | 0       | 0            | 0              | 0                    | 0             | -3.855   |
| MOR251-1  | 0                   | 0              | 0       | 0            | 0              | 0                    | 0             | 0        |
| MOR253-1  | 0                   | 0              | 0       | 0            | 0              | 0                    | 0             | 0        |
| MOR256-17 | -3.842              | -4.462         | 0       | 0            | 0              | 0                    | 0             | 0        |
| MOR258-1  | 0                   | 0              | 0       | 0            | 0              | 0                    | 0             | -4.296   |
| MOR259-1  | 0                   | 0              | 0       | -4.442       | 0              | 0                    | 0             | -3.834   |
| MOR260-1  | 0                   | 0              | 0       | 0            | 0              | 0                    | 0             | 0        |
| MOR261-1  | -3.425              | 0              | 0       | 0            | -3.352         | 0                    | 0             | 0        |
| MOR268-1  | -3.434              | 0              | 0       | 0            | 0              | 0                    | 0             | 0        |
| MOR269-1  | 0                   | 0              | 0       | -3.662       | 0              | 0                    | 0             | 0        |
| MOR271-1  | -4.23               | 0              | -4.005  | 0            | -5.379         | 0                    | 0             | 0        |
| MOR272-1  | -4.824              | 0              | 0       | 0            | -4.946         | 0                    | 0             | 0        |
| MOR273-1  | 0                   | 0              | 0       | 0            | 0              | 0                    | 0             | 0        |
| MOR277-1  | 0                   | 0              | 0       | 0            | 0              | 0                    | 0             | 0        |
| MOR30-1   | 0                   | 0              | 0       | 0            | 0              | 0                    | 0             | 0        |
| MOR31-1   | 0                   | 0              | 0       | 0            | 0              | 0                    | 0             | 0        |
| MOR33-1   | 0                   | 0              | 0       | 0            | 0              | 0                    | 0             | 0        |
| MOR37-1   | 0                   | 0              | 0       | 0            | 0              | 0                    | 0             | 0        |
| MOR4-1    | 0                   | 0              | 0       | 0            | 0              | 0                    | 0             | 0        |
| MOR40-1   | 0                   | 0              | 0       | 0            | 0              | 0                    | 0             | 0        |
| MOR41-1   | 0                   | 0              | 0       | 0            | -3.972         | 0                    | 0             | -4.785   |
| MOR5-1    | 0                   | 0              | 0       | 0            | 0              | 0                    | 0             | 0        |
| MOR9-1    | 0                   | 0              | 0       | 0            | 0              | 0                    | 0             | 0        |
| OR10J5    | 0                   | 0              | 0       | 0            | 0              | 0                    | 0             | 0        |
| OR1A1     | -5.119              | 0              | 0       | -4.008       | -3.391         | 0                    | 0             | 0        |
| OR2C1     | 0                   | 0              | 0       | 0            | 0              | 0                    | 0             | 0        |
| OR2J2     | 0                   | 0              | 0       | 0            | 0              | 0                    | 0             | -3.682   |
| OR2M7     | 0                   | 0              | 0       | 0            | 0              | 0                    | 0             | 0        |
| OR2W1     | -4.812              | 0              | 0       | -4.54        | -4.786         | 0                    | -4.427        | -4.065   |
| OR51E1    | 0                   | 0              | 0       | 0            | 0              | -3.473               | 0             | 0        |
| OR51E2    | 0                   | 0              | 0       | 0            | 0              | 0                    | 0             | 0        |
| OR51L1    | -4.17               | 0              | 0       | 0            | 0              | 0                    | 0             | 0        |
| OR5P3     | 0                   | 0              | 0       | 0            | 0              | 0                    | 0             | -5.25    |

Table S3. The numerical EC50 values (log M) displayed in Fig. 1



|           | Cyclohexanone | Decanal | Decanoic acid | Dihydrojasnone | Ethyl isobutyrate | Geraniol | Heptanal | Heptanoic acid | Hexanal |
|-----------|---------------|---------|---------------|----------------|-------------------|----------|----------|----------------|---------|
| MOR1-1    | 0             | 0       | 0             | 0              | 0                 | 0        | 0        | -3.823         | -3.987  |
| MOR105-1  | 0             | 0       | 0             | 0              | 0                 | 0        | 0        | 0              | 0       |
| MOR106-1  | 0             | 0       | 0             | 0              | 0                 | 0        | 0        | 0              | 0       |
| MOR107-1  | 0             | 0       | 0             | 0              | 0                 | 0        | 0        | 0              | 0       |
| MOR128-2  | 0             | 0       | 0             | 0              | 0                 | 0        | 0        | 0              | 0       |
| MOR129-1  | 0             | 0       | 0             | 0              | 0                 | 0        | 0        | 0              | 0       |
| MOR136-1  | -3.065        | 0       | 0             | 0              | 0                 | 0        | 0        | 0              | 0       |
| MOR139-1  | -3.138        | 0       | 0             | -4.308         | 0                 | -3.939   | 0        | 0              | 0       |
| MOR140-1  | 0             | 0       | 0             | -3.614         | 0                 | 0        | 0        | 0              | 0       |
| MOR15-1   | 0             | 0       | 0             | 0              | 0                 | 0        | 0        | 0              | 0       |
| MOR161-1  | 0             | 0       | 0             | 0              | 0                 | 0        | 0        | 0              | 0       |
| MOR162-1  | 0             | 0       | 0             | 0              | 0                 | 0        | 0        | 0              | 0       |
| MOR170-1  | 0             | 0       | 0             | 0              | 0                 | 0        | 0        | 0              | 0       |
| MOR18-1   | 0             | 0       | 0             | 0              | 0                 | 0        | 0        | 0              | 0       |
| MOR180-1  | 0             | 0       | 0             | 0              | 0                 | 0        | 0        | 0              | 0       |
| MOR182-1  | 0             | 0       | 0             | 0              | 0                 | 0        | 0        | 0              | 0       |
| MOR184-1  | 0             | 0       | 0             | 0              | 0                 | 0        | 0        | 0              | 0       |
| MOR185-1  | -3.594        | 0       | 0             | 0              | 0                 | 0        | 0        | 0              | 0       |
| MOR189-1  | 0             | 0       | 0             | -3.945         | 0                 | 0        | 0        | 0              | 0       |
| MOR2-1    | 0             | 0       | 0             | 0              | 0                 | 0        | 0        | 0              | 0       |
| MOR203-1  | 0             | 0       | -3.751        | 0              | 0                 | -3.622   | 0        | 0              | 0       |
| MOR204-6  | 0             | 0       | 0             | 0              | 0                 | 0        | 0        | 0              | 0       |
| MOR205-1  | 0             | 0       | 0             | -4.699         | 0                 | 0        | 0        | 0              | 0       |
| MOR207-1  | 0             | 0       | 0             | 0              | 0                 | 0        | 0        | 0              | 0       |
| MOR222-1  | 0             | 0       | 0             | 0              | 0                 | 0        | 0        | 0              | 0       |
| MOR223-1  | 0             | 0       | 0             | 0              | 0                 | 0        | 0        | 0              | 0       |
| MOR23-1   | 0             | 0       | 0             | 0              | 0                 | 0        | 0        | -4.856         | 0       |
| MOR236-1  | 0             | 0       | 0             | 0              | 0                 | -3.843   | 0        | 0              | 0       |
| MOR25-1   | 0             | 0       | -4.194        | 0              | 0                 | 0        | 0        | 0              | 0       |
| MOR250-1  | 0             | 0       | 0             | 0              | 0                 | 0        | 0        | 0              | 0       |
| MOR251-1  | -3.193        | 0       | 0             | 0              | 0                 | 0        | 0        | 0              | 0       |
| MOR253-1  | -3.219        | 0       | 0             | 0              | 0                 | 0        | 0        | 0              | 0       |
| MOR256-17 | -4.1          | 0       | -4.627        | 0              | 0                 | 0        | 0        | 0              | 0       |
| MOR258-1  | -3.824        | 0       | 0             | 0              | 0                 | 0        | 0        | 0              | 0       |
| MOR259-1  | 0             | 0       | 0             | 0              | 0                 | 0        | 0        | 0              | 0       |
| MOR260-1  | 0             | 0       | -3.542        | 0              | 0                 | 0        | 0        | 0              | 0       |
| MOR261-1  | 0             | 0       | 0             | 0              | 0                 | 0        | 0        | 0              | 0       |
| MOR268-1  | 0             | 0       | 0             | 0              | 0                 | -3.897   | 0        | 0              | 0       |
| MOR269-1  | 0             | 0       | 0             | 0              | 0                 | 0        | 0        | 0              | 0       |
| MOR271-1  | -3.463        | 0       | 0             | -4.126         | -4.077            | 0        | 0        | 0              | -3.322  |
| MOR272-1  | -3.254        | 0       | 0             | -4.447         | -5.25             | 0        | 0        | 0              | 0       |
| MOR273-1  | -3.208        | 0       | 0             | -4.441         | -5.761            | 0        | 0        | 0              | 0       |
| MOR277-1  | -3.566        | 0       | 0             | 0              | 0                 | 0        | 0        | 0              | 0       |
| MOR30-1   | 0             | -4.033  | -4.987        | 0              | 0                 | 0        | 0        | -3.575         | 0       |
| MOR31-1   | 0             | 0       | 0             | 0              | 0                 | 0        | 0        | -5.2           | 0       |
| MOR33-1   | 0             | 0       | -4.487        | 0              | 0                 | 0        | 0        | -4.148         | 0       |
| MOR37-1   | 0             | -3.477  | -4.323        | 0              | 0                 | 0        | 0        | 0              | 0       |
| MOR4-1    | 0             | 0       | 0             | 0              | 0                 | 0        | 0        | 0              | -3.231  |
| MOR40-1   | 0             | 0       | -4.121        | 0              | 0                 | 0        | 0        | 0              | 0       |
| MOR41-1   | -3.456        | 0       | 0             | -3.766         | 0                 | 0        | 0        | 0              | 0       |
| MOR5-1    | 0             | 0       | -3.749        | 0              | 0                 | 0        | 0        | -3.583         | 0       |
| MOR9-1    | 0             | 0       | 0             | 0              | 0                 | 0        | 0        | 0              | 0       |
| OR10J5    | 0             | 0       | 0             | 0              | 0                 | 0        | 0        | 0              | 0       |
| OR1A1     | 0             | 0       | 0             | -7.242         | 0                 | -3.467   | 0        | 0              | 0       |
| OR2C1     | 0             | 0       | 0             | 0              | 0                 | 0        | 0        | 0              | 0       |
| OR2J2     | 0             | 0       | 0             | 0              | 0                 | 0        | 0        | 0              | 0       |
| OR2M7     | 0             | 0       | 0             | 0              | 0                 | -3.203   | 0        | 0              | 0       |
| OR2W1     | 0             | 0       | -3.756        | -4.246         | 0                 | -4.736   | -4.056   | 0              | -5.102  |
| OR51E1    | 0             | 0       | 0             | 0              | 0                 | 0        | 0        | 0              | 0       |
| OR51E2    | 0             | 0       | 0             | 0              | 0                 | 0        | 0        | 0              | 0       |
| OR51L1    | 0             | 0       | 0             | 0              | 0                 | 0        | 0        | 0              | 0       |
| OR5P3     | 0             | 0       | 0             | 0              | 0                 | 0        | 0        | 0              | 0       |

Table S3. The numerical EC50 values (log M) displayed in Fig. 1

|           | Hexanoic acid | Hexyl acetate | Lylal  | Nonanal | Nonanethiol | Nonanoic acid | Octanal | Octanethiol | Octanoic acid |
|-----------|---------------|---------------|--------|---------|-------------|---------------|---------|-------------|---------------|
| MOR1-1    | -4.625        | 0             | 0      | 0       | 0           | 0             | 0       | 0           | 0             |
| MOR105-1  | 0             | 0             | 0      | 0       | 0           | 0             | 0       | 0           | 0             |
| MOR106-1  | 0             | 0             | 0      | 0       | 0           | 0             | 0       | 0           | 0             |
| MOR107-1  | 0             | 0             | 0      | 0       | 0           | 0             | 0       | 0           | 0             |
| MOR128-2  | 0             | 0             | 0      | 0       | 0           | 0             | 0       | 0           | 0             |
| MOR129-1  | 0             | 0             | 0      | 0       | 0           | 0             | 0       | 0           | 0             |
| MOR136-1  | 0             | 0             | 0      | 0       | 0           | 0             | 0       | 0           | 0             |
| MOR139-1  | 0             | 0             | 0      | 0       | 0           | 0             | 0       | 0           | 0             |
| MOR140-1  | 0             | 0             | 0      | 0       | 0           | 0             | 0       | 0           | 0             |
| MOR15-1   | 0             | 0             | 0      | 0       | 0           | 0             | 0       | 0           | 0             |
| MOR161-1  | 0             | 0             | 0      | 0       | 0           | 0             | 0       | 0           | 0             |
| MOR162-1  | 0             | 0             | 0      | 0       | 0           | 0             | 0       | 0           | 0             |
| MOR170-1  | 0             | 0             | 0      | 0       | 0           | 0             | 0       | 0           | 0             |
| MOR18-1   | 0             | 0             | 0      | 0       | 0           | -4.077        | 0       | 0           | 0             |
| MOR180-1  | 0             | 0             | 0      | 0       | 0           | 0             | 0       | 0           | 0             |
| MOR182-1  | 0             | 0             | 0      | 0       | 0           | 0             | 0       | 0           | 0             |
| MOR184-1  | 0             | 0             | 0      | 0       | 0           | 0             | 0       | 0           | 0             |
| MOR185-1  | 0             | 0             | 0      | 0       | 0           | 0             | 0       | 0           | 0             |
| MOR189-1  | 0             | 0             | 0      | 0       | 0           | 0             | 0       | 0           | 0             |
| MOR2-1    | 0             | 0             | 0      | 0       | 0           | 0             | 0       | 0           | 0             |
| MOR203-1  | 0             | 0             | 0      | 0       | -3.528      | -3.476        | 0       | -3.356      | 0             |
| MOR204-6  | 0             | 0             | 0      | 0       | 0           | 0             | 0       | 0           | 0             |
| MOR205-1  | 0             | 0             | 0      | 0       | 0           | 0             | 0       | 0           | 0             |
| MOR207-1  | 0             | 0             | 0      | 0       | 0           | 0             | 0       | 0           | 0             |
| MOR222-1  | 0             | 0             | 0      | 0       | 0           | 0             | 0       | 0           | 0             |
| MOR223-1  | 0             | 0             | 0      | 0       | 0           | 0             | 0       | 0           | 0             |
| MOR23-1   | 0             | 0             | 0      | 0       | 0           | 0             | 0       | 0           | -5.083        |
| MOR236-1  | 0             | 0             | 0      | 0       | 0           | 0             | 0       | 0           | 0             |
| MOR25-1   | 0             | 0             | 0      | 0       | 0           | 0             | 0       | 0           | -3.689        |
| MOR250-1  | 0             | 0             | 0      | 0       | 0           | 0             | 0       | 0           | 0             |
| MOR251-1  | 0             | 0             | 0      | 0       | 0           | 0             | 0       | 0           | 0             |
| MOR253-1  | 0             | 0             | 0      | 0       | 0           | 0             | 0       | 0           | 0             |
| MOR256-17 | 0             | 0             | -4.255 | 0       | 0           | -4.694        | 0       | -4.388      | -4.41         |
| MOR258-1  | 0             | 0             | 0      | 0       | 0           | 0             | 0       | 0           | 0             |
| MOR259-1  | 0             | 0             | 0      | 0       | 0           | 0             | 0       | 0           | 0             |
| MOR260-1  | 0             | 0             | 0      | 0       | -4.468      | -4.106        | 0       | 0           | 0             |
| MOR261-1  | 0             | 0             | 0      | 0       | -3.376      | 0             | 0       | 0           | 0             |
| MOR268-1  | 0             | 0             | 0      | 0       | -3.589      | 0             | 0       | 0           | 0             |
| MOR269-1  | 0             | 0             | 0      | 0       | 0           | 0             | 0       | 0           | 0             |
| MOR271-1  | 0             | 0             | 0      | 0       | 0           | 0             | 0       | 0           | 0             |
| MOR272-1  | 0             | 0             | 0      | 0       | 0           | 0             | 0       | 0           | 0             |
| MOR273-1  | 0             | 0             | 0      | 0       | 0           | 0             | 0       | 0           | 0             |
| MOR277-1  | 0             | 0             | 0      | 0       | 0           | 0             | 0       | 0           | 0             |
| MOR30-1   | 0             | 0             | 0      | -3.914  | 0           | -4.396        | 0       | 0           | -3.68         |
| MOR31-1   | 0             | 0             | 0      | 0       | 0           | 0             | 0       | 0           | 0             |
| MOR33-1   | 0             | 0             | 0      | -3.234  | 0           | -4.606        | 0       | 0           | -4.212        |
| MOR37-1   | 0             | 0             | 0      | -3.295  | 0           | -3.9          | 0       | 0           | 0             |
| MOR4-1    | 0             | 0             | 0      | 0       | 0           | 0             | 0       | 0           | 0             |
| MOR40-1   | 0             | 0             | 0      | -3.194  | 0           | -4.128        | 0       | 0           | -3.617        |
| MOR41-1   | 0             | 0             | 0      | 0       | 0           | 0             | 0       | 0           | 0             |
| MOR5-1    | 0             | 0             | 0      | 0       | 0           | -4.029        | 0       | 0           | -3.711        |
| MOR9-1    | 0             | 0             | 0      | 0       | 0           | 0             | 0       | 0           | 0             |
| OR10J5    | 0             | 0             | -3.489 | 0       | 0           | 0             | 0       | 0           | 0             |
| OR1A1     | 0             | 0             | 0      | 0       | -3.243      | 0             | 0       | -3.226      | 0             |
| OR2C1     | 0             | 0             | 0      | 0       | -3.893      | 0             | 0       | -4.051      | 0             |
| OR2J2     | 0             | 0             | 0      | 0       | 0           | 0             | 0       | 0           | 0             |
| OR2M7     | 0             | 0             | 0      | 0       | 0           | 0             | 0       | 0           | 0             |
| OR2W1     | 0             | -4.863        | 0      | -3.598  | -4.065      | -3.723        | -4.361  | -4.033      | -4.847        |
| OR51E1    | 0             | 0             | 0      | 0       | 0           | -3.609        | 0       | 0           | 0             |
| OR51E2    | 0             | 0             | 0      | 0       | 0           | 0             | 0       | 0           | 0             |
| OR51L1    | -3.834        | 0             | 0      | 0       | 0           | 0             | 0       | 0           | 0             |
| OR5P3     | 0             | 0             | 0      | 0       | 0           | 0             | 0       | 0           | 0             |

Table S3. The numerical EC50 values (log M) displayed in Fig. 1

|           | Pentanoic acid | Phenyl acetate | Prenyl acetate | Propionic acid | Vanillic acid | g-Caprolactone |
|-----------|----------------|----------------|----------------|----------------|---------------|----------------|
| MOR1-1    | -4.613         | 0              | 0              | 0              | 0             | 0              |
| MOR105-1  | 0              | 0              | 0              | 0              | 0             | 0              |
| MOR106-1  | 0              | -3.874         | 0              | 0              | 0             | 0              |
| MOR107-1  | 0              | 0              | 0              | 0              | 0             | 0              |
| MOR128-2  | 0              | 0              | 0              | 0              | 0             | 0              |
| MOR129-1  | 0              | 0              | 0              | 0              | 0             | 0              |
| MOR136-1  | 0              | 0              | 0              | 0              | 0             | 0              |
| MOR139-1  | 0              | -3.421         | -3.385         | 0              | 0             | 0              |
| MOR140-1  | 0              | 0              | 0              | 0              | 0             | 0              |
| MOR15-1   | 0              | 0              | 0              | 0              | -3.587        | 0              |
| MOR161-1  | 0              | 0              | 0              | 0              | 0             | 0              |
| MOR162-1  | 0              | 0              | 0              | 0              | 0             | 0              |
| MOR170-1  | 0              | 0              | 0              | 0              | 0             | 0              |
| MOR18-1   | 0              | 0              | 0              | 0              | 0             | 0              |
| MOR180-1  | 0              | 0              | -3.18          | 0              | 0             | 0              |
| MOR182-1  | 0              | 0              | 0              | 0              | 0             | 0              |
| MOR184-1  | 0              | 0              | 0              | 0              | 0             | 0              |
| MOR185-1  | 0              | 0              | 0              | 0              | 0             | -3.185         |
| MOR189-1  | 0              | 0              | 0              | 0              | 0             | 0              |
| MOR2-1    | 0              | 0              | 0              | 0              | 0             | 0              |
| MOR203-1  | 0              | -3.039         | -3.907         | 0              | 0             | -4.001         |
| MOR204-6  | 0              | 0              | 0              | 0              | 0             | 0              |
| MOR205-1  | 0              | 0              | 0              | 0              | 0             | 0              |
| MOR207-1  | 0              | 0              | 0              | 0              | 0             | 0              |
| MOR222-1  | 0              | 0              | 0              | 0              | 0             | 0              |
| MOR223-1  | 0              | -3.487         | 0              | 0              | 0             | 0              |
| MOR23-1   | 0              | 0              | 0              | 0              | 0             | 0              |
| MOR236-1  | 0              | 0              | 0              | 0              | 0             | 0              |
| MOR25-1   | 0              | 0              | 0              | 0              | 0             | 0              |
| MOR250-1  | 0              | -3.545         | 0              | 0              | 0             | 0              |
| MOR251-1  | 0              | 0              | 0              | 0              | 0             | 0              |
| MOR253-1  | 0              | 0              | 0              | 0              | 0             | 0              |
| MOR256-17 | 0              | 0              | 0              | 0              | 0             | 0              |
| MOR258-1  | 0              | 0              | -3.099         | 0              | 0             | -3.38          |
| MOR259-1  | 0              | 0              | 0              | 0              | 0             | 0              |
| MOR260-1  | 0              | 0              | 0              | 0              | 0             | 0              |
| MOR261-1  | 0              | 0              | 0              | 0              | 0             | 0              |
| MOR268-1  | 0              | 0              | 0              | 0              | 0             | 0              |
| MOR269-1  | 0              | 0              | 0              | 0              | 0             | 0              |
| MOR271-1  | 0              | 0              | -5.033         | 0              | 0             | -3.18          |
| MOR272-1  | 0              | 0              | -5.098         | 0              | 0             | -3.272         |
| MOR273-1  | 0              | 0              | 0              | 0              | 0             | 0              |
| MOR277-1  | 0              | 0              | 0              | 0              | 0             | 0              |
| MOR30-1   | 0              | 0              | 0              | 0              | 0             | 0              |
| MOR31-1   | 0              | 0              | 0              | 0              | 0             | 0              |
| MOR33-1   | 0              | 0              | 0              | 0              | 0             | 0              |
| MOR37-1   | 0              | 0              | 0              | 0              | 0             | 0              |
| MOR4-1    | 0              | 0              | 0              | 0              | 0             | 0              |
| MOR40-1   | 0              | 0              | 0              | 0              | 0             | 0              |
| MOR41-1   | 0              | -4.143         | 0              | 0              | 0             | 0              |
| MOR5-1    | 0              | 0              | 0              | 0              | 0             | 0              |
| MOR9-1    | 0              | 0              | 0              | 0              | -6.334        | 0              |
| OR10J5    | 0              | 0              | 0              | 0              | 0             | 0              |
| OR1A1     | 0              | 0              | 0              | 0              | 0             | 0              |
| OR2C1     | 0              | 0              | 0              | 0              | 0             | 0              |
| OR2J2     | 0              | 0              | 0              | 0              | 0             | 0              |
| OR2M7     | 0              | 0              | 0              | 0              | 0             | 0              |
| OR2W1     | 0              | 0              | -4.071         | 0              | 0             | 0              |
| OR51E1    | 0              | 0              | 0              | 0              | 0             | 0              |
| OR51E2    | 0              | 0              | 0              | -3.963         | 0             | 0              |
| OR51L1    | 0              | 0              | 0              | 0              | 0             | 0              |
| OR5P3     | 0              | 0              | 0              | 0              | 0             | 0              |

Table S3. The numerical EC50 values (log M) displayed in Fig. 1

|            |             |             |             |             |           |             |             |
|------------|-------------|-------------|-------------|-------------|-----------|-------------|-------------|
| 100-06-1   | 102-13-6    | 104-53-0    | 10588-15-5  | 108-22-5    | 110-86-1  | 112-43-6    | 119-65-3    |
| 100-09-4   | 102-16-9    | 104-54-1    | 105-89-5    | 108-39-4    | 110-89-4  | 112-44-7    | 1197-01-9   |
| 10022-28-3 | 102-17-0    | 104-55-2    | 105-90-8    | 108-47-4    | 110-93-0  | 112-45-8    | 119-84-6    |
| 10024-56-3 | 102-19-2    | 104-57-4    | 105-91-9    | 108-48-5    | 110-98-5  | 1125-21-9   | 1200-67-5   |
| 10024-57-4 | 102-20-5    | 104-61-0    | 105-95-3    | 108-50-9    | 111-11-5  | 112-53-8    | 120-11-6    |
| 10024-64-3 | 102-22-7    | 10461-98-0  | 10599-70-9  | 108-64-5    | 111-12-6  | 112-54-9    | 120-14-9    |
| 10024-97-2 | 102369-06-2 | 104-62-1    | 106-02-5    | 108-82-7    | 111-13-7  | 1125-88-8   | 120-24-1    |
| 1002-84-2  | 102-69-2    | 104-64-3    | 106-18-3    | 108-83-8    | 111-14-8  | 112-63-0    | 120-45-6    |
| 1003-04-9  | 102-76-1    | 104-65-4    | 106-21-8    | 108-94-1    | 111-26-2  | 112-66-3    | 120-50-3    |
| 10031-71-7 | 103-05-9    | 104-67-6    | 106-22-9    | 108-95-2    | 111-27-3  | 112-80-1    | 120-51-4    |
| 10031-82-0 | 103-07-1    | 104691-41-0 | 106-23-0    | 108-98-5    | 111-28-4  | 1128-08-1   | 1205-17-0   |
| 10031-86-4 | 103-13-9    | 10471-14-4  | 106-24-1    | 109-05-7    | 111-30-8  | 112-92-5    | 120-57-0    |
| 10031-87-5 | 10321-71-8  | 10471-96-2  | 106-25-2    | 109-08-0    | 1113-13-9 | 1129-47-1   | 120-72-9    |
| 10031-88-6 | 103-25-3    | 104-76-7    | 106-26-3    | 109-15-9    | 111-31-9  | 1131-62-0   | 120-92-3    |
| 10031-90-0 | 103-26-4    | 10482-55-0  | 106-27-4    | 109-19-3    | 1113-21-9 | 113486-29-6 | 1209-61-6   |
| 10031-92-2 | 103-28-6    | 10482-56-1  | 106-28-5    | 109-20-6    | 1113-60-6 | 113889-23-9 | 121-00-6    |
| 10031-93-3 | 103-36-6    | 10482-77-6  | 106-29-6    | 109-21-7    | 111-47-7  | 1139-30-6   | 1211-29-6   |
| 10031-96-6 | 103-37-7    | 10482-79-8  | 106-30-9    | 109-25-1    | 1115-11-3 | 1142-85-4   | 121251-67-0 |
| 10032-00-5 | 103-38-8    | 10484-09-0  | 106-32-1    | 109-29-5    | 111-66-0  | 1153-51-1   | 121251-68-1 |
| 10032-02-7 | 10339-55-6  | 10484-36-3  | 106-33-2    | 109-42-2    | 111-70-6  | 115-95-7    | 121-32-4    |
| 10032-05-0 | 10340-23-5  | 10486-14-3  | 106-35-4    | 109-52-4    | 111-71-7  | 115-99-1    | 121-33-5    |
| 10032-08-3 | 103-41-3    | 10486-19-8  | 106-36-5    | 109537-55-5 | 1117-55-1 | 116-02-9    | 121-34-6    |
| 10032-13-0 | 103-45-7    | 104-87-0    | 106-44-5    | 109-60-4    | 1117-61-9 | 116-26-7    | 121-39-1    |
| 10032-15-2 | 103-48-0    | 104-90-5    | 106-65-0    | 109-73-9    | 111-79-5  | 116-53-0    | 121-44-8    |
| 10039-39-1 | 103-50-4    | 104-93-8    | 106-68-3    | 109-79-5    | 111-80-8  | 117013-33-9 | 121-79-9    |
| 100-42-5   | 103-52-6    | 104986-28-9 | 106-70-7    | 109-80-8    | 111-81-9  | 117933-89-8 | 121-98-2    |
| 100-51-6   | 103-53-7    | 105-01-1    | 106-72-9    | 109-94-4    | 111-82-0  | 117-98-6    | 122-00-9    |
| 100-52-7   | 103-54-8    | 105-13-5    | 106-73-0    | 109-95-5    | 1118-27-0 | 1184-78-7   | 122-03-2    |
| 100-53-8   | 103-56-0    | 10519-11-6  | 107-03-9    | 109-97-7    | 1118-39-4 | 118-55-8    | 1222-05-5   |
| 10058-43-2 | 103-58-2    | 10519-33-2  | 107-10-8    | 110-15-6    | 111-87-5  | 118-58-1    | 122-40-7    |
| 1006-27-5  | 103-59-3    | 105-21-5    | 1072-83-9   | 110-17-8    | 111-90-0  | 118-60-5    | 122-43-0    |
| 100-66-3   | 103-60-6    | 10521-91-2  | 1073-11-6   | 110-19-0    | 1119-06-8 | 118-61-6    | 122-44-1    |
| 100-68-5   | 103-61-7    | 10522-18-6  | 1073-26-3   | 110-27-0    | 1119-44-4 | 118-71-8    | 122-45-2    |
| 10072-05-6 | 103-64-0    | 105-37-3    | 1073-29-6   | 11031-45-1  | 112-05-0  | 118-72-9    | 122-48-5    |
| 100-86-7   | 103694-68-4 | 105-43-1    | 107-35-7    | 110-38-3    | 112-06-1  | 1188-02-9   | 122-57-6    |
| 10094-34-5 | 103-82-2    | 10544-63-5  | 107-41-5    | 110-39-4    | 112-12-9  | 1189-09-9   | 122-59-8    |
| 10094-36-7 | 103-93-5    | 105463-44-3 | 107-43-7    | 110-40-7    | 112-14-1  | 118-93-4    | 12262-03-2  |
| 10094-41-4 | 103-95-7    | 105-53-3    | 1076-56-8   | 110-41-8    | 112-17-4  | 1191-16-8   | 122-63-4    |
| 101-39-3   | 10402-33-2  | 105-54-4    | 107-74-4    | 110-42-9    | 112-19-6  | 1191-43-1   | 122-67-8    |
| 101-41-7   | 10402-47-8  | 105-57-7    | 107-75-5    | 110-43-0    | 112-23-2  | 1191-62-4   | 122-68-9    |
| 101-48-4   | 10402-48-9  | 105-60-2    | 107-85-7    | 110-44-1    | 1122-54-9 | 1192-58-1   | 122-69-0    |
| 101-49-5   | 10402-52-5  | 105-66-8    | 107-86-8    | 110-45-2    | 1122-62-9 | 1192-62-7   | 122-70-3    |
| 10152-76-8 | 104-09-6    | 105-68-0    | 107-87-9    | 110458-85-0 | 112-30-1  | 1193-11-9   | 122-72-5    |
| 101-81-5   | 10414-68-3  | 105-79-3    | 107898-54-4 | 11050-62-7  | 112-31-2  | 1193-18-6   | 122-73-6    |
| 101-84-8   | 10415-87-9  | 10580-25-3  | 1079-01-2   | 110-58-7    | 112-32-3  | 119-36-8    | 122-74-7    |
| 101-85-9   | 10415-88-0  | 105-82-8    | 107-92-6    | 110-62-3    | 112-37-8  | 1193-79-9   | 122-78-1    |
| 101-86-0   | 104-20-1    | 105-85-1    | 107-95-9    | 110-66-7    | 1123-85-9 | 1195-32-0   | 122-79-2    |
| 101-94-0   | 104-21-2    | 105-86-2    | 1080-12-2   | 110-74-7    | 112-38-9  | 119-53-9    | 122-84-9    |
| 101-97-3   | 104-45-0    | 105-87-3    | 108-10-1    | 110-81-6    | 1124-11-4 | 1196-01-6   | 122-91-8    |
| 102-04-5   | 104-50-7    | 10588-10-0  | 108-21-4    | 110-85-0    | 112-42-5  | 119-61-9    | 122-97-4    |

Table S4. CAS registry numbers for 2,683 odorants used to estimate the size of odorant space. Structure files were obtained from (<http://www.thegoodscentscopy.com>).

|             |             |             |            |             |             |             |             |
|-------------|-------------|-------------|------------|-------------|-------------|-------------|-------------|
| 122-99-6    | 13109-70-1  | 135-79-5    | 140-39-6   | 14667-55-1  | 1576-95-0   | 1731-84-6   | 18492-65-4  |
| 123-07-9    | 13112-65-7  | 13623-11-5  | 1405-92-1  | 1470-50-4   | 1577-18-0   | 1731-86-8   | 18640-74-9  |
| 123-08-0    | 13162-46-4  | 1365-19-1   | 140-67-0   | 147159-49-7 | 1577-19-1   | 1733-25-1   | 1866-31-5   |
| 123-11-5    | 13171-00-1  | 136-60-7    | 14073-97-3 | 14735-72-9  | 15986-80-8  | 17369-59-4  | 18679-18-0  |
| 123-15-9    | 131766-73-9 | 13678-58-5  | 140-88-5   | 14765-30-1  | 1599-47-9   | 17369-60-7  | 1871-67-6   |
| 123-19-3    | 131812-67-4 | 13678-59-6  | 141-06-0   | 147-85-3    | 1599-49-1   | 17369-61-8  | 1875-89-4   |
| 123-25-1    | 13184-86-6  | 13678-60-9  | 141-09-3   | 14812-03-4  | 1604-28-0   | 17373-84-1  | 18776-92-6  |
| 123-29-5    | 1319-88-6   | 13678-67-6  | 14109-72-9 | 14901-07-6  | 1608-72-6   | 17373-89-6  | 1878-18-8   |
| 123-32-0    | 1321-30-8   | 13678-68-7  | 141-10-6   | 149982-46-7 | 16128-68-0  | 17488-65-2  | 18794-77-9  |
| 123-35-3    | 13215-88-8  | 13679-46-4  | 141-11-7   | 150-30-1    | 1617-23-8   | 17511-60-3  | 18794-84-8  |
| 123-38-6    | 1321-89-7   | 13679-61-3  | 141-12-8   | 150436-68-3 | 1617-40-9   | 1754-62-7   | 18824-63-0  |
| 123-51-3    | 1322-17-4   | 13679-70-4  | 141-13-9   | 1504-55-8   | 1618-26-4   | 17587-33-6  | 18829-55-5  |
| 123-54-6    | 1322-34-5   | 13679-85-1  | 141-14-0   | 1504-74-1   | 16251-77-7  | 1759-28-0   | 18829-56-6  |
| 123-63-7    | 1322-58-3   | 13679-86-2  | 141-15-1   | 1504-75-2   | 1629-58-9   | 17597-95-4  | 18836-52-7  |
| 123-66-0    | 1323-00-8   | 136954-20-6 | 141-16-2   | 1506-02-1   | 1632-73-1   | 17619-36-2  | 1883-78-9   |
| 123-68-2    | 13246-52-1  | 136954-21-7 | 141-25-3   | 150-60-7    | 16356-11-9  | 17699-14-8  | 1885-38-7   |
| 123-72-8    | 13254-34-7  | 136954-22-8 | 14129-48-7 | 150-78-7    | 1639-09-4   | 1775-43-5   | 188570-78-7 |
| 123-75-1    | 13257-44-8  | 137-00-8    | 14159-61-6 | 150-84-5    | 16409-43-1  | 1786-08-9   | 188590-62-7 |
| 123-76-2    | 133-18-6    | 137-03-1    | 14173-25-2 | 150-86-7    | 16409-45-3  | 17909-77-2  | 18871-14-2  |
| 123-86-4    | 1331-92-6   | 137-06-4    | 141-78-6   | 151-05-3    | 16409-46-4  | 1797-74-6   | 1888-90-0   |
| 123-96-6    | 13327-56-5  | 13706-86-0  | 141-79-7   | 151-10-0    | 16429-21-3  | 180031-78-1 | 18999-28-5  |
| 124-04-9    | 1333-58-0   | 13708-12-8  | 141-92-4   | 15111-96-3  | 1646-26-0   | 18031-40-8  | 19009-56-4  |
| 124-06-1    | 133-37-9    | 137-32-6    | 141-97-9   | 15111-97-4  | 16491-24-0  | 18060-79-2  | 1901-26-4   |
| 124-07-2    | 13341-72-5  | 13794-15-5  | 142-19-8   | 151-19-9    | 16491-25-1  | 18096-62-3  | 1901-38-8   |
| 124-10-7    | 1334-78-7   | 13794-73-5  | 142-60-9   | 1516-17-2   | 16491-36-4  | 18114-49-3  | 19089-92-0  |
| 124-12-9    | 1334-82-3   | 13816-33-6  | 142-62-1   | 15186-51-3  | 16491-54-6  | 181258-87-7 | 19139-31-2  |
| 124-13-0    | 13351-61-6  | 138-22-7    | 142-83-6   | 15323-35-0  | 16493-80-4  | 18127-01-0  | 19141-40-3  |
| 124-19-6    | 1335-44-0   | 138-23-8    | 142-91-6   | 1534-08-3   | 1653-30-1   | 18138-03-9  | 19224-26-1  |
| 124-25-4    | 1335-46-2   | 13828-37-0  | 142-92-7   | 15356-74-8  | 16587-71-6  | 18138-04-0  | 19269-28-4  |
| 124-76-5    | 1335-66-6   | 13851-11-1  | 143-07-7   | 15373-31-6  | 16630-52-7  | 18138-05-1  | 19317-11-4  |
| 125109-85-5 | 13360-64-0  | 13877-91-3  | 143-08-8   | 154171-76-3 | 16630-55-0  | 18172-67-3  | 19322-27-1  |
| 125-12-2    | 1337-83-3   | 13877-93-5  | 14309-57-0 | 154171-77-4 | 16630-60-7  | 18189-02-1  | 19342-01-9  |
| 125352-06-9 | 134123-93-6 | 138-86-3    | 143-13-5   | 1551-44-6   | 16630-66-3  | 18189-07-6  | 1946-00-5   |
| 126-64-7    | 13419-69-7  | 138-87-4    | 143-14-6   | 156-06-9    | 166432-52-6 | 182699-77-0 | 19487-61-7  |
| 126-91-0    | 134-20-3    | 13894-63-8  | 143-28-2   | 1565-76-0   | 1669-44-9   | 18277-27-5  | 196109-18-9 |
| 127-17-3    | 134-28-1    | 13925-00-3  | 14360-50-0 | 1565-81-7   | 1670-47-9   | 18318-83-7  | 1963-36-6   |
| 127-41-3    | 13442-90-5  | 13925-03-6  | 14371-10-9 | 15679-12-6  | 1679-07-8   | 18368-91-7  | 1968-40-7   |
| 127-42-4    | 134454-31-2 | 13925-05-8  | 14374-92-6 | 15679-13-7  | 169054-69-7 | 18383-49-8  | 19700-21-1  |
| 127-43-5    | 13466-78-9  | 13925-06-9  | 1438-91-1  | 15679-19-3  | 16930-93-1  | 18402-83-0  | 19788-49-9  |
| 127-51-5    | 134769-33-8 | 13925-07-0  | 1438-94-4  | 1569-60-4   | 16930-96-4  | 18409-17-1  | 19819-98-8  |
| 127-91-3    | 13477-62-8  | 139-45-7    | 14400-67-0 | 15706-73-7  | 16939-73-4  | 18409-18-2  | 198404-98-7 |
| 128119-70-0 | 13481-87-3  | 139504-68-0 | 14436-32-9 | 15707-23-0  | 1706-12-3   | 18409-20-6  | 19870-74-7  |
| 128-37-0    | 13491-79-7  | 13952-84-6  | 144-39-8   | 15707-24-1  | 1708-34-5   | 18409-21-7  | 19872-52-7  |
| 128-50-7    | 13494-06-9  | 139-70-8    | 14481-52-8 | 1575-74-2   | 1708-35-6   | 18433-93-7  | 19902-08-0  |
| 128-51-8    | 13494-07-0  | 13991-37-2  | 14481-55-1 | 15760-18-6  | 1708-81-2   | 18436-37-8  | 20053-88-7  |
| 13002-09-0  | 134-96-3    | 140-10-3    | 145-39-1   | 15764-16-6  | 17092-92-1  | 18479-51-1  | 20125-81-9  |
| 13019-20-0  | 135-02-4    | 140-11-4    | 14576-08-0 | 1576-77-8   | 17102-64-6  | 18479-54-4  | 20125-84-2  |
| 13019-22-2  | 13532-18-8  | 140-25-0    | 14595-54-1 | 1576-78-9   | 1725-01-5   | 18479-57-7  | 2021-28-5   |
| 13074-63-0  | 13552-96-0  | 140-26-1    | 1460-34-0  | 1576-85-8   | 17283-81-7  | 18479-58-8  | 202188-43-0 |
| 13074-65-2  | 13567-39-0  | 140-27-2    | 14620-52-1 | 1576-87-0   | 1728-46-7   | 18485-38-6  | 20279-51-0  |

Table S4. CAS registry numbers for 2,683 odorants used to estimate the size of odorant space. Structure files were obtained from (<http://www.thegoodscentscopy.com>).

|             |             |             |            |            |             |            |            |
|-------------|-------------|-------------|------------|------------|-------------|------------|------------|
| 20286-45-7  | 21662-13-5  | 2306-78-7   | 2439-44-3  | 25680-57-3 | 288-47-1    | 3149-28-8  | 3386-97-8  |
| 20298-69-5  | 21662-16-8  | 2306-88-9   | 24401-36-3 | 25680-58-4 | 28897-58-7  | 31499-71-5 | 33885-51-7 |
| 20333-39-5  | 21722-83-8  | 2306-91-4   | 196780     | 2568-25-4  | 28940-11-6  | 31499-72-6 | 543088     |
| 2035-99-6   | 2173-56-0   | 2307-10-0   | 2444-46-4  | 25773-40-4 | 29021-37-2  | 31501-11-8 | 3391-83-1  |
| 2040-10-0   | 2173-57-1   | 2308-18-1   | 2444-49-7  | 2623-23-6  | 290-37-9    | 31502-14-4 | 3391-86-4  |
| 20407-84-5  | 2177-77-7   | 2311-46-8   | 2445-67-2  | 2628-17-3  | 29214-60-6  | 31539-84-1 | 33922-73-5 |
| 2044-73-7   | 2179-57-9   | 2315-68-6   | 2445-72-9  | 26303-90-2 | 29350-73-0  | 3155-71-3  | 34047-39-7 |
| 2046-17-5   | 2179-58-0   | 23267-57-4  | 2445-76-3  | 2630-39-9  | 29414-47-9  | 31704-80-0 | 3407-42-9  |
| 20474-93-5  | 2179-59-1   | 23328-62-3  | 2445-77-4  | 2639-63-6  | 29460-90-0  | 3188-00-9  | 34131-98-1 |
| 20489-53-6  | 2179-60-4   | 23333-91-7  | 2445-78-5  | 2639-68-1  | 29548-14-9  | 31906-04-4 | 34135-85-8 |
| 2049-96-9   | 21834-92-4  | 233665-96-8 | 2463-53-8  | 26446-31-1 | 29548-30-9  | 3194-17-0  | 34291-99-1 |
| 53329       | 21835-01-8  | 2344-70-9   | 24653-75-6 | 26446-32-2 | 29606-79-9  | 3208-16-0  | 34300-94-2 |
| 2050-08-0   | 2186-92-7   | 2345-24-6   | 24680-50-0 | 26553-47-9 | 29725-66-4  | 3208-40-0  | 34322-09-3 |
| 53570       | 21948-70-9  | 2345-26-8   | 24683-00-9 | 26643-91-4 | 29759-11-3  | 3209-13-0  | 34365-79-2 |
| 2050-87-5   | 21963-26-8  | 2345-28-0   | 24691-15-4 | 2679-87-0  | 29811-50-5  | 32210-23-4 | 34413-35-9 |
| 2051-78-7   | 21964-44-3  | 162721      | 24717-85-9 | 26912-64-1 | 2983-36-0   | 32214-91-8 | 34451-19-9 |
| 2051-96-9   | 2198-61-0   | 2349-13-5   | 24720-09-0 | 27039-84-5 | 2983-37-1   | 32388-55-9 | 34495-71-1 |
| 2052-14-4   | 22014-48-8  | 23495-12-7  | 24817-51-4 | 2705-87-5  | 2983-38-2   | 3239-35-8  | 3452-97-9  |
| 2052-15-5   | 22029-76-1  | 2351-90-8   | 24851-98-7 | 297890     | 2986-54-1   | 3239-37-0  | 34545-88-5 |
| 20582-85-8  | 22030-19-9  | 23550-40-5  | 2497-18-9  | 2721-22-4  | 29895-73-6  | 488211     | 3460-44-4  |
| 20662-84-4  | 22047-25-2  | 2363-88-4   | 2497-21-4  | 27538-09-6 | 29896-45-5  | 3240-29-7  | 34686-67-4 |
| 20665-85-4  | 22094-00-4  | 23696-85-7  | 2500-83-6  | 2756-56-1  | 29926-41-8  | 3249-68-1  | 34686-71-0 |
| 20680-10-8  | 22104-80-9  | 23726-91-2  | 25013-16-5 | 2758-18-1  | 29926-42-9  | 32659-21-5 | 34687-46-2 |
| 20691-52-5  | 22104-81-0  | 23747-43-5  | 2511-00-4  | 27593-23-3 | 3008-43-3   | 326-61-4   | 34764-02-8 |
| 20777-49-5  | 2216-45-7   | 23747-45-7  | 25152-84-5 | 27606-09-3 | 30086-02-3  | 32665-23-9 | 3487-99-8  |
| 20780-48-7  | 2216-51-5   | 23747-48-0  | 25152-85-6 | 27625-35-0 | 30100-15-3  | 3268-49-3  | 3488-00-4  |
| 20780-49-8  | 2216-52-6   | 23787-80-6  | 2520-60-7  | 27743-70-0 | 3016-19-1   | 32736-91-7 | 3489-28-9  |
| 20834-59-7  | 2216-81-1   | 23787-90-8  | 25225-08-5 | 27817-67-0 | 30168-23-1  | 32737-14-7 | 34902-57-3 |
| 2084-18-6   | 2217-33-6   | 23811-08-7  | 25225-10-9 | 27829-72-7 | 3025-30-7   | 32764-98-0 | 350-03-8   |
| 2084-19-7   | 117731      | 23832-18-0  | 25265-71-8 | 2785-87-7  | 302-72-7    | 32803-39-7 | 35044-57-6 |
| 20920-83-6  | 2235-83-8   | 2396-77-2   | 25279-09-8 | 2785-89-9  | 30310-41-9  | 328-50-7   | 35044-58-7 |
| 2100-17-6   | 22418-66-2  | 2396-78-3   | 228916     | 27939-60-2 | 3033-23-6   | 3289-28-9  | 35044-59-8 |
| 21016-46-6  | 2244-16-8   | 2396-83-0   | 25304-14-7 | 28043-10-9 | 30361-28-5  | 3293-47-8  | 35087-49-1 |
| 21063-71-8  | 22457-23-4  | 2396-84-1   | 25312-34-9 | 28069-72-9 | 30361-29-6  | 32974-92-8 | 3508-98-3  |
| 2109-22-0   | 2253-73-8   | 2403-58-9   | 25409-08-9 | 28069-74-1 | 30390-50-2  | 3301-90-4  | 35154-45-1 |
| 2110-18-1   | 129176      | 24048-14-4  | 25415-62-7 | 28217-92-7 | 30408-61-8  | 3301-94-8  | 35158-25-9 |
| 2111-75-3   | 22629-49-8  | 2408-20-0   | 25415-67-2 | 28219-60-5 | 30418-89-4  | 33046-81-0 | 35178-55-3 |
| 21129-27-1  | 22694-96-8  | 2408-37-9   | 25435-63-6 | 28219-61-6 | 30453-31-7  | 33049-93-3 | 35205-76-6 |
| 211323-05-6 | 2270-60-2   | 2412-80-8   | 25485-88-5 | 28231-03-0 | 3054-92-0   | 3338-55-4  | 35206-51-0 |
| 2114-33-2   | 227456-27-1 | 24168-70-5  | 2548-87-0  | 2835-39-4  | 30640-46-1  | 334-48-5   | 35234-22-1 |
| 21145-77-7  | 227456-28-2 | 2416-94-6   | 2550-11-0  | 28371-99-5 | 30673-38-2  | 334-49-6   | 35250-53-4 |
| 21188-58-9  | 22771-44-4  | 24237-00-1  | 2550-26-7  | 2847-30-5  | 30772-79-3  | 33467-73-1 | 352-93-2   |
| 2120-70-9   | 2277-16-9   | 24295-03-2  | 2550-40-5  | 28588-73-0 | 30895-79-5  | 33467-74-2 | 35448-31-8 |
| 21280-29-5  | 2277-19-2   | 2432-51-1   | 2550-52-9  | 28588-74-1 | 30897-75-7  | 33467-76-4 | 35472-56-1 |
| 2142-94-1   | 2278-53-7   | 2432-77-1   | 25524-95-2 | 28588-75-2 | 3100-36-5   | 33467-79-7 | 3549-23-3  |
| 2153-26-6   | 22810-10-2  | 2432-91-9   | 238419     | 28631-86-9 | 31375-17-4  | 33522-69-9 | 3558-60-9  |
| 2153-28-8   | 22882-89-9  | 24330-52-7  | 25564-22-1 | 28645-51-4 | 313973-37-4 | 33662-58-7 | 3564-98-5  |
| 21593-77-1  | 2294-76-0   | 2435-16-7   | 240883     | 28664-35-9 | 31416-78-1  | 33673-62-0 | 609379     |
| 21661-97-2  | 146589      | 2437-25-4   | 25634-93-9 | 2882-20-4  | 3142-66-3   | 33673-65-3 | 3581-91-7  |
| 21662-09-9  | 2305-25-1   | 2437-95-8   | 2565-82-4  | 28839-13-6 | 3142-72-1   | 33704-61-9 | 3583-00-4  |

Table S4. CAS registry numbers for 2,683 odorants used to estimate the size of odorant space. Structure files were obtained from (<http://www.thegoodscentscopy.com>).

|            |            |             |            |            |            |            |            |
|------------|------------|-------------|------------|------------|------------|------------|------------|
| 35852-41-6 | 38325-25-6 | 40878-72-6  | 4360-47-8  | 472-97-9   | 50-21-5    | 1205978    | 538-86-3   |
| 35852-46-1 | 38363-23-4 | 40910-49-4  | 4361-23-3  | 473-15-4   | 502-47-6   | 52210-18-1 | 53889-39-7 |
| 35854-86-5 | 707902     | 40923-64-6  | 4362-22-5  | 4732-13-2  | 502-61-4   | 5240-32-4  | 5392-40-5  |
| 35926-04-6 | 38433-74-8 | 40942-73-2  | 898649     | 473-67-6   | 502-69-2   | 52474-60-9 | 539-30-0   |
| 3600-24-6  | 38446-21-8 | 4112-89-4   | 4395-92-0  | 4740-79-8  | 502-72-7   | 52517-67-6 | 5396-89-4  |
| 622683     | 38462-22-5 | 41199-19-3  | 4410-99-5  | 1038568    | 50373-36-9 | 52557-97-8 | 539-82-2   |
| 3613-30-7  | 38462-23-6 | 41239-48-9  | 4411-89-6  | 4748-78-1  | 503-74-2   | 5271-38-5  | 539-88-8   |
| 36219-73-5 | 3848-24-6  | 41270-80-8  | 4426-79-3  | 475-03-6   | 505-10-2   | 527-60-6   | 539-90-2   |
| 36267-71-7 | 3856-25-5  | 41453-56-9  | 4430-31-3  | 475-20-7   | 505-29-3   | 52789-73-8 | 540-07-8   |
| 36306-87-3 | 38713-41-6 | 41496-43-9  | 4430-36-8  | 4798-44-1  | 505-32-8   | 5287-45-6  | 540-18-1   |
| 36431-72-8 | 38917-61-2 | 41519-18-0  | 4430-39-1  | 4798-61-2  | 505-57-7   | 52-90-4    | 540-42-1   |
| 36438-54-7 | 38917-62-3 | 41519-23-7  | 4430-42-6  | 4819-67-4  | 505-79-3   | 5292-21-7  | 5405-41-4  |
| 3658-77-3  | 39026-94-3 | 41547-22-2  | 4433-36-7  | 4826-62-4  | 50607-64-2 | 53018-24-9 | 5405-58-3  |
| 3658-79-5  | 39067-39-5 | 41653-97-8  | 4437-20-1  | 4861-58-9  | 50623-57-9 | 53046-97-2 | 1279415    |
| 3658-80-8  | 39067-80-6 | 4166-20-5   | 4437-22-3  | 4861-85-2  | 50626-02-3 | 53053-51-3 | 540-63-6   |
| 3658-93-3  | 3913-71-1  | 41724-19-0  | 4437-51-8  | 4864-61-3  | 50-69-1    | 531-26-0   | 5406-58-6  |
| 3661-77-6  | 3913-80-2  | 4180-23-8   | 443-79-8   | 488-10-8   | 50-70-4    | 531-59-9   | 54082-68-7 |
| 36653-82-4 | 3913-81-3  | 41816-03-9  | 4440-65-7  | 4883-60-7  | 507-09-5   | 5320-75-2  | 54089-83-7 |
| 36701-01-6 | 3915-83-1  | 41820-22-8  | 4442-79-9  | 489-40-7   | 50746-10-6 | 53243-59-7 | 541-31-1   |
| 36789-59-0 | 39212-23-2 | 41847-88-5  | 4455-13-4  | 489-86-1   | 507-70-0   | 53243-60-0 | 541-35-5   |
| 36806-46-9 | 39251-86-0 | 41890-92-0  | 4466-24-4  | 490-03-9   | 5077-67-8  | 53263-58-4 | 5413-60-5  |
| 3681-71-8  | 39251-88-2 | 42075-45-6  | 4493-42-9  | 4906-24-5  | 50816-18-7 | 5328-37-0  | 541-47-9   |
| 3681-82-1  | 39252-02-3 | 42078-65-9  | 4500-58-7  | 491-04-3   | 50-81-7    | 5331-14-6  | 541-58-2   |
| 3682-42-6  | 39252-03-4 | 4208-49-5   | 4501-58-0  | 491-07-6   | 5090-41-5  | 5331-32-8  | 5418-86-0  |
| 37160-77-3 | 39255-32-8 | 4208-57-5   | 45019-28-1 | 491-09-8   | 51100-54-0 | 533-18-6   | 541-91-3   |
| 37172-02-4 | 3943-74-6  | 4230-97-1   | 4532-64-3  | 4927-39-3  | 51115-67-4 | 53338-05-9 | 1284897    |
| 37172-05-7 | 39481-28-2 | 42348-12-9  | 4536-23-6  | 4938-52-7  | 51154-96-2 | 53398-78-0 | 5421-17-0  |
| 37172-53-5 | 39711-79-0 | 42370-07-0  | 4573-50-6  | 1109189    | 512-13-0   | 53398-80-4 | 5421-27-2  |
| 3720-16-9  | 39736-25-9 | 42436-07-7  | 4586-22-5  | 4948-28-1  | 5132-75-2  | 53398-83-7 | 5422-34-4  |
| 3724-61-6  | 39741-41-8 | 42474-44-2  | 459-80-3   | 494-90-6   | 513-44-0   | 53398-85-9 | 542-46-1   |
| 3724-65-0  | 39748-49-7 | 4253-89-8   | 4602-84-0  | 495-40-9   | 51352-68-2 | 53398-86-0 | 542-55-2   |
| 3738-00-9  | 39770-05-3 | 42604-12-6  | 4606-15-9  | 495-62-5   | 5137-52-0  | 53398-87-1 | 5426-78-8  |
| 37514-30-0 | 39872-57-6 | 426218-78-2 | 992463     | 495-76-1   | 513-86-0   | 53399-81-8 | 542-85-8   |
| 37526-88-8 | 39900-38-4 | 4265-16-1   | 995835     | 49576-57-0 | 5146-66-7  | 53405-97-3 | 54300-08-2 |
| 3760-11-0  | 39924-52-2 | 4265-97-8   | 4630-82-4  | 496-77-5   | 515-00-4   | 534-15-6   | 54300-09-3 |
| 37609-25-9 | 40010-99-9 | 42822-86-6  | 4634-89-3  | 497-03-0   | 51532-26-4 | 534-22-5   | 543-39-5   |
| 37617-03-1 | 40018-26-6 | 42824-62-4  | 4643-25-8  | 497-23-4   | 51534-66-8 | 53448-07-0 | 54340-90-8 |
| 37674-63-8 | 40188-41-8 | 42919-64-2  | 4643-27-0  | 49776-81-0 | 51566-62-2 | 53475-15-3 | 5434-57-1  |
| 37677-14-8 | 40203-73-4 | 43039-98-1  | 464-43-7   | 498-00-0   | 515-69-5   | 53488-14-5 | 543-49-7   |
| 3777-69-3  | 4023-65-8  | 43040-01-3  | 464-45-9   | 498-02-2   | 51595-91-6 | 5349-62-2  | 5435-64-3  |
| 3777-71-7  | 40348-72-9 | 431-03-8    | 464-49-3   | 498-81-7   | 516-06-3   | 53498-32-1 | 5436-21-5  |
| 3782-00-1  | 40527-42-2 | 4312-99-6   | 465-24-7   | 499-12-7   | 51608-18-5 | 5362-56-1  | 54393-36-1 |
| 37837-44-8 | 40654-82-8 | 879933      | 4674-50-4  | 499-44-5   | 51652-47-2 | 536-50-5   | 54411-06-2 |
| 37887-04-0 | 40716-66-3 | 43219-68-7  | 4695-62-9  | 499-54-7   | 5166-53-0  | 536-59-4   | 5442-00-2  |
| 3796-70-1  | 4077-47-8  | 432-25-7    | 469-61-4   | 499-70-7   | 51-67-2    | 536-60-7   | 544-40-1   |
| 37973-51-6 | 40785-62-4 | 894025      | 470-67-7   | 499-75-2   | 51755-66-9 | 536-78-7   | 54440-17-4 |
| 38205-60-6 | 40789-98-8 | 4351-54-6   | 4707-47-5  | 500-02-7   | 51755-83-0 | 53767-93-4 | 544-63-8   |
| 38205-64-0 | 40790-04-3 | 4359-31-3   | 470-82-6   | 5009-32-5  | 51755-85-2 | 53833-30-0 | 54464-57-2 |
| 38223-29-9 | 40853-53-0 | 4359-47-1   | 472-66-2   | 501-52-0   | 5182-36-5  | 53833-32-2 | 54464-59-4 |
| 38285-49-3 | 40853-56-3 | 4359-57-3   | 4728-82-9  | 501-92-8   | 1205849    | 538-65-8   | 54484-73-0 |

Table S4. CAS registry numbers for 2,683 odorants used to estimate the size of odorant space. Structure files were obtained from (<http://www.thegoodscentscopy.com>).

|             |            |            |            |            |            |            |            |
|-------------|------------|------------|------------|------------|------------|------------|------------|
| 5451-52-5   | 55764-28-8 | 579-07-7   | 591-12-8   | 60788-25-2 | 623-19-8   | 629-63-0   | 65113-95-3 |
| 5451-80-9   | 5577-44-6  | 57934-97-1 | 591-24-2   | 607-90-9   | 623-21-2   | 629-70-9   | 65113-99-7 |
| 5451-88-7   | 5579-78-2  | 1420859    | 591-49-1   | 60-82-2    | 623-22-3   | 6297-41-2  | 1683469    |
| 5451-95-6   | 5595-79-9  | 1420891    | 59151-19-8 | 60826-15-5 | 623-30-3   | 6304-24-1  | 65155-45-5 |
| 1296065     | 56011-02-0 | 579-74-8   | 591-60-6   | 6091-50-5  | 623-36-9   | 6309-51-9  | 65330-49-6 |
| 1296855     | 560-88-3   | 579-75-9   | 591-68-4   | 611-13-2   | 623-37-0   | 6314-97-2  | 65405-67-6 |
| 1296920     | 56-12-2    | 579-93-1   | 591-80-0   | 61114-24-7 | 623-42-7   | 63187-91-7 | 65405-68-7 |
| 5454-19-3   | 5616-51-3  | 58-08-2    | 591-82-2   | 61197-09-9 | 623-70-1   | 1616205    | 65405-70-1 |
| 5454-21-7   | 56172-46-4 | 58214-97-4 | 59191-78-5 | 612-15-7   | 62395-45-3 | 63449-64-9 | 65405-72-3 |
| 5454-28-4   | 562-74-3   | 58296-81-4 | 592-20-1   | 61295-41-8 | 624-09-9   | 63449-68-3 | 65405-73-4 |
| 54546-26-8  | 56-40-6    | 583-04-0   | 59230-57-8 | 61295-44-1 | 624-24-8   | 63500-71-0 | 65405-76-7 |
| 5457-70-5   | 564-20-5   | 583-60-8   | 5925-68-8  | 61295-50-9 | 62439-41-2 | 635-46-1   | 65405-77-8 |
| 5458-59-3   | 564-94-3   | 5837-78-5  | 5925-75-7  | 61295-51-0 | 624-41-9   | 63759-55-7 | 65405-80-3 |
| 1299385     | 5655-61-8  | 583-92-6   | 59259-38-0 | 613-70-7   | 624-51-1   | 637-64-9   | 65405-84-7 |
| 1299690     | 5660-60-6  | 58430-94-7 | 592-82-5   | 61444-38-0 | 624-54-4   | 637-65-0   | 65416-14-0 |
| 54644-28-9  | 56700-78-8 | 585-25-1   | 592-84-7   | 61444-41-5 | 62488-56-6 | 63767-86-2 | 65423-25-8 |
| 546-49-6    | 56747-96-7 | 58567-11-6 | 592-88-1   | 614-99-3   | 624-89-5   | 637-78-5   | 65442-31-1 |
| 1301153     | 56767-18-1 | 585-84-2   | 593-08-8   | 615-10-1   | 624-92-0   | 6378-65-0  | 65443-14-3 |
| 546-79-2    | 56805-23-3 | 58625-96-0 | 59323-76-1 | 616-25-1   | 625-33-2   | 6380-23-0  | 65504-97-4 |
| 1301880     | 56-81-5    | 586-38-9   | 59324-17-3 | 61692-83-9 | 625-55-8   | 638-02-8   | 65505-16-0 |
| 5471-51-2   | 56836-93-2 | 586-62-9   | 59354-71-1 | 61692-84-0 | 625-60-5   | 638-11-9   | 65505-17-1 |
| 547-63-7    | 56-84-8    | 586-81-2   | 59376-58-8 | 61699-38-5 | 62563-80-8 | 638-17-5   | 65505-18-2 |
| 54814-64-1  | 56-85-9    | 586-82-3   | 5943-34-0  | 617-01-6   | 625-80-9   | 638-25-5   | 65505-24-0 |
| 54815-13-3  | 56-86-0    | 5870-68-8  | 59471-80-6 | 617-35-6   | 6258-63-5  | 638-49-3   | 65505-25-1 |
| 54830-99-8  | 56-87-1    | 5870-93-9  | 5947-36-4  | 617-50-5   | 625-86-5   | 638-53-9   | 65530-53-2 |
| 548774-80-7 | 56922-74-8 | 58-86-6    | 1477529    | 6175-49-1  | 6259-76-3  | 63-91-2    | 65588-69-4 |
| 54889-48-4  | 5694-72-4  | 588-67-0   | 59-51-8    | 61792-11-8 | 626-11-9   | 63986-03-8 | 6561-39-3  |
| 54947-74-9  | 56973-85-4 | 589-35-5   | 59558-23-5 | 61810-55-7 | 6263-65-6  | 64001-15-6 | 65620-50-0 |
| 54957-02-7  | 57-06-7    | 58936-30-4 | 5986-38-9  | 61826-53-7 | 626-38-0   | 64-04-0    | 656-53-1   |
| 54982-83-1  | 57074-37-0 | 589-38-8   | 598-75-4   | 619-01-2   | 626-77-7   | 1647153    | 65737-52-2 |
| 55066-48-3  | 57082-24-3 | 589-59-3   | 5988-91-0  | 61-90-5    | 626-82-4   | 6413-26-9  | 65813-53-8 |
| 55066-49-4  | 57094-40-3 | 589-66-2   | 5989-27-5  | 6191-71-5  | 1594715    | 64165-57-7 | 65817-24-5 |
| 55066-56-3  | 57-10-3    | 589-75-3   | 5989-54-8  | 61920-45-4 | 6270-56-0  | 64-17-5    | 65-85-0    |
| 551-08-6    | 57-11-4    | 589-82-2   | 600-14-6   | 61931-80-4 | 627-90-7   | 64-18-6    | 65887-08-3 |
| 551-93-9    | 57124-87-5 | 58985-18-5 | 600-18-0   | 61931-81-5 | 628-00-2   | 64187-83-3 | 65894-82-8 |
| 55253-28-6  | 5724-81-2  | 589-92-4   | 60047-17-8 | 620-02-0   | 628-03-5   | 64-19-7    | 65894-83-9 |
| 554-12-1    | 57345-19-4 | 589-98-0   | 60-12-8    | 620-23-5   | 6281-40-9  | 64275-73-6 | 659-70-1   |
| 55418-52-5  | 57378-68-4 | 590-01-2   | 60-18-4    | 620-79-1   | 6284-46-4  | 644-08-6   | 66062-78-0 |
| 5552-30-7   | 57500-00-2 | 59020-85-8 | 60241-53-4 | 62079-29-2 | 628-46-6   | 644-13-3   | 66068-84-6 |
| 5555-90-8   | 57-55-6    | 59020-90-5 | 60241-55-6 | 62147-49-3 | 628-63-7   | 644-35-9   | 66072-32-0 |
| 556-24-1    | 5756-24-1  | 59021-02-2 | 6028-61-1  | 621-82-9   | 628-97-7   | 644-49-5   | 6622-76-0  |
| 556-61-6    | 57568-60-2 | 59052-82-3 | 6032-29-7  | 6221-93-8  | 628-99-9   | 64461-99-0 | 6624-71-1  |
| 556-82-1    | 57576-09-7 | 5905-46-4  | 60-33-3    | 6222-35-1  | 6290-17-1  | 645-13-6   | 66-25-1    |
| 557-00-6    | 5760-50-9  | 5905-47-5  | 60335-71-9 | 622-39-9   | 6290-37-5  | 6454-22-4  | 6627-88-9  |
| 55704-78-4  | 576-26-1   | 59056-62-1 | 60-35-5    | 622-45-7   | 629-12-9   | 645-56-7   | 6628-18-8  |
| 55719-85-2  | 5764-85-2  | 59056-64-3 | 60415-61-4 | 622-62-8   | 629-19-6   | 6457-30-3  | 66327-54-6 |
| 557-48-2    | 577-16-2   | 59056-70-1 | 60523-21-9 | 622-78-6   | 629-33-4   | 64577-91-9 | 6635-22-9  |
| 55764-22-2  | 57743-63-2 | 590-86-3   | 606-45-1   | 623-05-2   | 629-45-8   | 646-07-1   | 1729185    |
| 55764-23-3  | 578-58-5   | 5910-87-2  | 6066-49-5  | 623-15-4   | 629-59-4   | 6485-40-1  | 66408-78-4 |
| 55764-25-5  | 57893-27-3 | 5910-89-4  | 60763-41-9 | 623-17-6   | 629-62-9   | 6493-80-7  | 66576-71-4 |

Table S4. CAS registry numbers for 2,683 odorants used to estimate the size of odorant space. Structure files were obtained from (<http://www.thegoodscentscopy.com>).



|            |            |            |            |            |            |            |            |
|------------|------------|------------|------------|------------|------------|------------|------------|
| 6658-48-6  | 67801-44-9 | 68141-17-3 | 68901-15-5 | 70851-61-5 | 7361-80-0  | 75-07-0    | 7774-65-4  |
| 66634-97-7 | 67801-47-2 | 68155-66-8 | 68901-22-4 | 71-00-1    | 7367-81-9  | 75-08-1    | 77-74-7    |
| 66642-86-2 | 67801-64-3 | 68155-67-9 | 68901-32-6 | 710-04-3   | 7367-82-0  | 75147-23-8 | 7774-74-5  |
| 66848-40-6 | 67801-65-4 | 68213-87-6 | 68922-10-1 | 71048-82-3 | 7367-88-6  | 75-18-3    | 7774-79-0  |
| 67028-40-4 | 6784-13-0  | 68258-95-7 | 68922-11-2 | 71077-31-1 | 73757-27-4 | 75-21-8    | 7774-82-5  |
| 6707-60-4  | 67845-30-1 | 68259-33-6 | 68928-82-5 | 71159-90-5 | 7392-19-0  | 75-31-0    | 7774-96-1  |
| 6725-64-0  | 67845-42-5 | 68345-22-2 | 68959-28-4 | 71-23-8    | 7403-42-1  | 2056136    | 7775-00-0  |
| 6728-26-3  | 67845-46-9 | 68378-13-2 | 68966-86-9 | 71298-42-5 | 74094-60-3 | 75-33-2    | 7775-38-4  |
| 6728-31-0  | 67859-96-5 | 68391-29-7 | 689-67-8   | 71-36-3    | 74094-61-4 | 7540-51-4  | 7775-39-5  |
| 67355-38-8 | 67860-38-2 | 68391-39-9 | 689-89-4   | 713-95-1   | 74094-62-5 | 7540-53-6  | 7778-83-8  |
| 6738-23-4  | 67874-67-3 | 68398-18-5 | 68991-97-9 | 71-41-0    | 74094-63-6 | 7541-49-3  | 7778-87-2  |
| 67452-27-1 | 67874-69-5 | 68411-38-1 | 69038-78-4 | 7143-69-3  | 7416-35-5  | 7549-33-9  | 7778-96-3  |
| 675-09-2   | 67874-72-0 | 68419-46-5 | 69103-20-4 | 7149-26-0  | 74338-72-0 | 7549-37-3  | 7779-16-0  |
| 6753-98-6  | 67874-78-6 | 68480-06-8 | 6911-51-9  | 7149-29-3  | 74356-31-3 | 7549-41-9  | 7779-17-1  |
| 67601-05-2 | 67874-81-1 | 68480-08-0 | 6915-15-7  | 7149-32-8  | 74367-97-8 | 75-50-3    | 7779-23-9  |
| 67-63-0    | 67879-60-1 | 68480-11-5 | 6920-22-5  | 71500-37-3 | 74410-10-9 | 2063957    | 7779-30-8  |
| 67633-94-7 | 67883-79-8 | 68480-14-8 | 69226-05-7 | 1918228    | 7452-79-1  | 75853-49-5 | 7779-41-1  |
| 67633-96-9 | 6789-80-6  | 68480-15-9 | 692-86-4   | 71566-51-3 | 7460-74-4  | 759-05-7   | 7779-50-2  |
| 67633-97-0 | 6789-88-4  | 68480-25-1 | 69300-15-8 | 71566-53-5 | 74758-91-1 | 76-09-5    | 7779-65-9  |
| 67633-99-2 | 67905-40-2 | 68480-26-2 | 6931-54-0  | 71648-34-5 | 74758-93-3 | 762-26-5   | 7779-70-6  |
| 67634-00-8 | 6790-58-5  | 68480-27-3 | 693-54-9   | 71660-03-2 | 74-79-3    | 762-29-8   | 7779-72-8  |
| 67634-01-9 | 67919-67-9 | 68480-28-4 | 69382-62-3 | 71735-79-0 | 7492-37-7  | 76238-22-7 | 7779-73-9  |
| 67634-07-5 | 67920-63-2 | 68527-74-2 | 693-95-8   | 71832-76-3 | 7492-39-9  | 764-39-6   | 7779-75-1  |
| 67634-11-1 | 67952-59-4 | 68527-76-4 | 69486-14-2 | 72007-81-9 | 7492-41-3  | 764-40-9   | 7779-77-3  |
| 67634-14-4 | 67952-60-7 | 68527-77-5 | 695-06-7   | 72089-08-8 | 7492-44-6  | 76-49-3    | 7779-78-4  |
| 67634-15-5 | 67952-65-2 | 68555-53-3 | 6963-56-0  | 72117-72-7 | 7492-45-7  | 765-05-9   | 7779-80-8  |
| 67634-17-7 | 67999-56-8 | 68555-57-7 | 69668-87-7 | 7212-44-4  | 7492-65-1  | 76-50-6    | 7779-81-9  |
| 67634-20-2 | 6803-40-3  | 68555-58-8 | 69-72-7    | 7217-59-6  | 7492-66-2  | 765-70-8   | 7779-94-4  |
| 67634-22-4 | 68039-24-7 | 68555-59-9 | 6975-60-6  | 72-18-4    | 7492-67-3  | 7664-38-2  | 2146322    |
| 67634-23-5 | 68039-26-9 | 68555-61-3 | 6976-72-3  | 72214-23-4 | 7492-69-5  | 76649-14-4 | 77-83-8    |
| 67634-25-7 | 68039-29-2 | 68555-62-4 | 698-10-2   | 72257-53-5 | 7492-70-8  | 76649-16-6 | 7784-67-0  |
| 67634-26-8 | 68039-39-4 | 68555-63-5 | 698-27-1   | 72403-67-9 | 74-93-1    | 76649-17-7 | 7784-98-7  |
| 67-64-1    | 68039-44-1 | 68555-65-7 | 6986-51-2  | 72429-08-4 | 7493-57-4  | 76649-22-4 | 77851-07-1 |
| 67662-96-8 | 68039-47-4 | 68555-94-2 | 698-76-0   | 72437-56-0 | 7493-58-5  | 76649-23-5 | 7785-33-3  |
| 67663-01-8 | 68039-49-6 | 68555-95-3 | 69882-09-3 | 72437-68-4 | 7493-59-6  | 76649-26-8 | 7785-53-7  |
| 67674-36-6 | 68039-69-0 | 68683-20-5 | 699-10-5   | 7251-61-8  | 7493-63-2  | 766-92-7   | 7785-63-9  |
| 67674-46-8 | 68039-73-6 | 68683-25-0 | 699-17-2   | 72797-17-2 | 7493-65-4  | 76788-46-0 | 7785-66-2  |
| 67-68-5    | 68083-58-9 | 68698-57-7 | 69925-33-3 | 72854-42-3 | 7493-66-5  | 770-27-4   | 7786-29-0  |
| 67689-50-3 | 68084-03-7 | 68698-59-9 | 69929-16-4 | 72881-27-7 | 7493-68-7  | 77118-93-5 | 7786-47-2  |
| 67707-75-9 | 68084-04-8 | 68705-63-5 | 69929-17-5 | 72894-12-3 | 7493-69-8  | 77311-02-5 | 7786-48-3  |
| 67715-79-1 | 68127-22-0 | 68738-94-3 | 70092-23-8 | 7289-52-3  | 7493-71-2  | 7732-18-5  | 7786-58-5  |
| 67715-80-4 | 68132-80-9 | 68738-96-5 | 7011-83-8  | 72928-51-9 | 7493-72-3  | 774-55-0   | 7786-61-0  |
| 67739-11-1 | 68133-72-2 | 68738-99-8 | 70214-77-6 | 72928-52-0 | 7493-74-5  | 77-53-2    | 7787-20-4  |
| 67746-30-9 | 68133-73-3 | 68739-00-4 | 705-73-7   | 73003-91-5 | 7493-76-7  | 77-54-3    | 77-92-9    |
| 67770-79-0 | 68133-75-5 | 6876-13-7  | 705-86-2   | 1973383    | 7493-78-9  | 7756-96-9  | 77-93-0    |
| 67785-76-6 | 68133-76-6 | 68845-00-1 | 706-14-9   | 73157-43-4 | 7493-79-0  | 7764-50-3  | 78-35-3    |
| 67785-77-7 | 68133-77-7 | 68845-02-3 | 7070-15-7  | 7335-26-4  | 7493-80-3  | 77-70-3    | 78-36-4    |
| 67801-20-1 | 68133-78-8 | 68845-36-3 | 707-29-9   | 7341-17-5  | 7493-82-5  | 7774-44-9  | 78-37-5    |
| 67801-33-6 | 68133-79-9 | 68877-29-2 | 70788-30-6 | 73545-18-3 | 75-04-7    | 7774-47-2  | 78417-28-4 |
| 67801-38-1 | 68140-48-7 | 688-82-4   | 70851-60-4 | 73545-19-4 | 75048-15-6 | 7774-60-9  | 78-59-1    |

Table S4. CAS registry numbers for 2,683 odorants used to estimate the size of odorant space. Structure files were obtained from (<http://www.thegoodscentscopy.com>).

|            |            |            |            |            |              |
|------------|------------|------------|------------|------------|--------------|
| 78649-62-4 | 82185-41-9 | 88-09-5    | 928-94-9   | 94406-15-2 | 99-48-9      |
| 78-69-3    | 823-22-3   | 88-15-3    | 928-95-0   | 94-46-2    | 99583-29-6   |
| 78-70-6    | 82356-51-2 | 881-68-5   | 928-96-1   | 94-47-3    | 996-97-4     |
| 78-81-9    | 82461-14-1 | 882-33-7   | 928-97-2   | 94-48-4    | 99-72-9      |
| 78-83-1    | 825-51-4   | 88-29-9    | 93-04-9    | 94-50-8    | 99-76-3      |
| 78-84-2    | 82654-98-6 | 88-41-5    | 93-08-3    | 94-62-2    | 99-83-2      |
| 78-93-3    | 82784-84-7 | 88-69-7    | 93-15-2    | 94-86-0    | 99-85-4      |
| 78-96-6    | 828-26-2   | 88-84-6    | 93-16-3    | 950-33-4   | 99-86-5      |
| 78-98-8    | 83-34-1    | 89-47-4    | 93-18-5    | 95-16-9    | 99-87-6      |
| 78989-37-4 | 83-66-9    | 89-48-5    | 93-19-6    | 95-21-6    | 99-93-4      |
| 79-09-4    | 83-67-0    | 89534-38-3 | 932-16-1   | 95-41-0    | 999-40-6     |
| 79-20-9    | 84012-64-6 | 89-65-6    | 93-28-7    | 95-48-7    | 99-96-7      |
| 79-31-2    | 84029-92-5 | 89-74-7    | 93-29-8    | 95-65-8    | 300-57-2     |
| 79-42-5    | 84029-93-6 | 89780-06-3 | 93-51-6    | 95-87-4    | 591-78-6     |
| 79-69-6    | 84434-18-4 | 89-78-1    | 93-53-8    | 95962-14-4 | 1455-21-6    |
| 79771-15-6 | 84642-60-4 | 89-79-2    | 93-54-9    | 96-04-8    | 94805-33-1   |
| 79-77-6    | 84642-61-5 | 89-81-6    | 93-55-0    | 96-15-1    | 938-79-4.    |
| 79-78-7    | 84-66-2    | 89-82-7    | 93-58-3    | 96-17-3    | 4286-15-1.   |
| 79-89-0    | 84681-92-5 | 89-83-8    | 93-60-7    | 96-26-4    | 1076-38-6.   |
| 79915-74-5 | 84697-09-6 | 89-86-1    | 937-30-4   | 96-48-0    | 130066-44-3. |
| 79-92-5    | 84788-08-9 | 89-88-3    | 93762-35-7 | 96-54-8    | 464-48-2.    |
| 8007-35-0  | 85136-06-7 | 90-02-8    | 93840-90-5 | 97358-54-8 | 491-37-2.    |
| 80118-06-5 | 85213-22-5 | 9003-73-0  | 93-89-0    | 97358-55-9 | 5524-05-0.   |
| 80-25-1    | 85351-07-1 | 90-05-1    | 93905-03-4 | 97384-48-0 | 553-86-6.    |
| 80-26-2    | 85392-03-6 | 90-12-0    | 93-91-4    | 97-41-6    | 71-43-2.     |
| 80-27-3    | 85508-08-3 | 90-17-5    | 939-21-9   | 97-42-7    | 68-11-1      |
| 80417-97-6 | 85554-72-9 | 90397-38-9 | 93-92-5    | 97-45-0    | 123-92-2     |
| 80449-58-7 | 85586-67-0 | 90-42-6    | 93939-86-7 | 97-53-0    | 123-99-9     |
| 80480-24-6 | 85761-70-2 | 90-43-7    | 939-48-0   | 97-54-1    | 126-81-8     |
| 80-54-6    | 85-91-6    | 90530-04-4 | 93952-58-0 | 97-61-0    | 6033-23-4    |
| 80-56-8    | 86241-90-9 | 90-87-9    | 93981-50-1 | 97-62-1    | 6169-06-8    |
| 80-57-9    | 86803-90-9 | 91069-40-8 | 94-02-0    | 97-64-3    | 20487-40-5   |
| 80-59-1    | 868-57-5   | 91-10-1    | 94021-42-8 | 97-67-6    |              |
| 80623-07-0 | 870-23-5   | 91-16-7    | 94087-23-7 | 97752-28-8 |              |
| 80-62-6    | 87061-04-9 | 91-22-5    | 94087-83-9 | 97-85-8    |              |
| 80657-64-3 | 87118-95-4 | 91482-37-0 | 94089-01-7 | 97-87-0    |              |
| 80-71-7    | 87-19-4    | 91-60-1    | 94089-02-8 | 97890-13-6 |              |
| 80858-47-5 | 87-20-7    | 91-61-2    | 94-13-3    | 97-89-2    |              |
| 80866-83-7 | 87-22-9    | 91-62-3    | 94134-03-9 | 97-96-1    |              |
| 81-14-1    | 87-25-2    | 91-64-5    | 94159-31-6 | 97-99-4    |              |
| 81-15-2    | 87-29-6    | 91-87-2    | 94159-32-7 | 98-00-0    |              |
| 814-67-5   | 87-41-2    | 92046-48-5 | 941-98-0   | 98-01-1    |              |
| 816-66-0   | 87-44-5    | 92-48-8    | 94201-19-1 | 98-02-2    |              |
| 81752-87-6 | 874-66-8   | 92-52-4    | 94201-73-7 | 98-52-2    |              |
| 81782-77-6 | 874-90-8   | 925-78-0   | 94-26-8    | 98-53-3    |              |
| 81783-01-9 | 87641-23-4 | 92585-24-5 | 94278-27-0 | 98-54-4    |              |
| 81786-73-4 | 87641-24-5 | 927-49-1   | 94293-57-9 | 98-55-5    |              |
| 81925-81-7 | 87-69-4    | 928-80-3   | 94-30-4    | 98-85-1    |              |
| 821-41-0   | 87731-18-8 | 928-91-6   | 94346-09-5 | 98-86-2    |              |
| 821-55-6   | 87-91-2    | 928-92-7   | 94386-48-8 | 98-89-5    |              |

Table S4. CAS registry numbers for 2,683 odorants used to estimate the size of odorant space. Structure files were obtained from (<http://www.thegoodscentscompany.com>).

| Property    | Position in Alignment | Weight |
|-------------|-----------------------|--------|
| Volume      | 24                    | 1      |
| Volume      | 31                    | 1      |
| Composition | 43                    | 1      |
| Volume      | 52                    | 1      |
| Volume      | 71                    | 1      |
| Composition | 86                    | 1      |
| Polarity    | 107                   | 1      |
| Composition | 140                   | 1      |
| Polarity    | 149                   | 1      |
| Volume      | 160                   | 1      |
| Polarity    | 171                   | 1      |
| Polarity    | 210                   | 1      |
| Volume      | 255                   | 2      |
| Composition | 257                   | 1      |
| Composition | 267                   | 2      |
| Polarity    | 276                   | 2      |

**Table S5.** 16 amino acid property descriptors that explain over 53% of the variance in our dataset. Note that some descriptors have a weight higher than one.
